# Supplementary material for: Transcriptome Analysis Reveals the Effect of Long Intergenic Noncoding RNAs on Pig Muscle Growth and Fat Deposition
Source: Biomed Res Int. 2019 Jun 25;2019:2951427. doi: 10.1155/2019/2951427 (PMC6614983; doi:10.1155/2019/2951427)
Supplement: Supplementary Materials — File S1: All lincRNAs comment files. Table S1: The specific expression of the DEGs between two tissues (af vs. ldm). Table S2: The specific expression of the DEGs between two tissues (af vs. liver). Table S3: The specific expression of the DEGs between two tissues (ldm vs. liver). Table S4: The basic information of the 272 DEGs. Table S5: Results of functional enrichment in gene ontology and pathway analysis. Table S6: Results of relevant QTLs screened by DELs. Table S7: PCR primers of 4 pairs of lincRNAs and PTGs. [file 2951427.f1.zip]

Archive with 9 entries (9 files):
- .DS_Store
- FileS1.gtf
- TableS1.csv
- TableS2.csv
- TableS3.csv
- TableS4.xlsx
- TableS5.xlsx
- TableS6.xlsx
- TableS7.xlsx
