# Supplementary material for: Transcriptome Analysis Reveals the Effect of Long Intergenic Noncoding RNAs on Pig Muscle Growth and Fat Deposition
Source: Biomed Res Int. 2019 Jun 25;2019:2951427. doi: 10.1155/2019/2951427 (PMC6614983; doi:10.1155/2019/2951427)
Supplement: Supplementary Materials — File S1: All lincRNAs comment files. Table S1: The specific expression of the DEGs between two tissues (af vs. ldm). Table S2: The specific expression of the DEGs between two tissues (af vs. liver). Table S3: The specific expression of the DEGs between two tissues (ldm vs. liver). Table S4: The basic information of the 272 DEGs. Table S5: Results of functional enrichment in gene ontology and pathway analysis. Table S6: Results of relevant QTLs screened by DELs. Table S7: PCR primers of 4 pairs of lincRNAs and PTGs. [file 2951427.f1.zip › FileS1.gtf]

1	StringTie	exon	226562	226830	1000	-	.	gene_id "MSTRG.4"; transcript_id "MSTRG.4.1"; exon_number "1";
1	StringTie	exon	227383	227575	1000	-	.	gene_id "MSTRG.4"; transcript_id "MSTRG.4.1"; exon_number "2";
1	StringTie	exon	1698896	1698946	1000	+	.	gene_id "MSTRG.34"; transcript_id "MSTRG.34.1"; exon_number "1";
1	StringTie	exon	1699917	1700674	1000	+	.	gene_id "MSTRG.34"; transcript_id "MSTRG.34.1"; exon_number "2";
1	StringTie	exon	1753673	1753961	1000	+	.	gene_id "MSTRG.37"; transcript_id "MSTRG.37.1"; exon_number "1";
1	StringTie	exon	1756033	1756833	1000	+	.	gene_id "MSTRG.37"; transcript_id "MSTRG.37.1"; exon_number "2";
1	StringTie	exon	1779805	1779863	1000	+	.	gene_id "MSTRG.39"; transcript_id "MSTRG.39.1"; exon_number "1";
1	StringTie	exon	1801692	1803927	1000	+	.	gene_id "MSTRG.39"; transcript_id "MSTRG.39.1"; exon_number "2";
1	StringTie	exon	1758222	1758543	1000	+	.	gene_id "MSTRG.41"; transcript_id "MSTRG.41.2"; exon_number "1";
1	StringTie	exon	1767666	1768416	1000	+	.	gene_id "MSTRG.41"; transcript_id "MSTRG.41.2"; exon_number "2";
1	StringTie	exon	4256754	4257171	1000	+	.	gene_id "MSTRG.99"; transcript_id "MSTRG.99.1"; exon_number "1";
1	StringTie	exon	4257409	4257444	1000	+	.	gene_id "MSTRG.99"; transcript_id "MSTRG.99.1"; exon_number "2";
1	StringTie	exon	4321048	4321192	1000	+	.	gene_id "MSTRG.101"; transcript_id "MSTRG.101.1"; exon_number "1";
1	StringTie	exon	4322916	4323671	1000	+	.	gene_id "MSTRG.101"; transcript_id "MSTRG.101.1"; exon_number "2";
1	StringTie	exon	7058679	7058832	1000	-	.	gene_id "MSTRG.131"; transcript_id "MSTRG.131.1"; exon_number "1";
1	StringTie	exon	7059612	7059728	1000	-	.	gene_id "MSTRG.131"; transcript_id "MSTRG.131.1"; exon_number "2";
1	StringTie	exon	7061100	7061189	1000	-	.	gene_id "MSTRG.131"; transcript_id "MSTRG.131.1"; exon_number "3";
1	StringTie	exon	7488987	7489234	1000	-	.	gene_id "MSTRG.140"; transcript_id "MSTRG.140.1"; exon_number "1";
1	StringTie	exon	7491529	7491838	1000	-	.	gene_id "MSTRG.140"; transcript_id "MSTRG.140.1"; exon_number "2";
1	StringTie	exon	8348130	8348405	1000	+	.	gene_id "MSTRG.163"; transcript_id "MSTRG.163.1"; exon_number "1";
1	StringTie	exon	8349252	8349322	1000	+	.	gene_id "MSTRG.163"; transcript_id "MSTRG.163.1"; exon_number "2";
1	StringTie	exon	8350127	8350696	1000	+	.	gene_id "MSTRG.163"; transcript_id "MSTRG.163.1"; exon_number "3";
1	StringTie	exon	15072239	15072296	1000	-	.	gene_id "MSTRG.263"; transcript_id "MSTRG.263.1"; exon_number "1";
1	StringTie	exon	15146103	15146672	1000	-	.	gene_id "MSTRG.263"; transcript_id "MSTRG.263.1"; exon_number "2";
1	StringTie	exon	14148364	14149215	1000	-	.	gene_id "MSTRG.306"; transcript_id "MSTRG.306.1"; exon_number "1";
1	StringTie	exon	14149708	14149767	1000	-	.	gene_id "MSTRG.306"; transcript_id "MSTRG.306.1"; exon_number "2";
1	StringTie	exon	14151033	14151438	1000	-	.	gene_id "MSTRG.306"; transcript_id "MSTRG.306.1"; exon_number "3";
1	StringTie	exon	16653403	16653743	1000	-	.	gene_id "MSTRG.319"; transcript_id "MSTRG.319.1"; exon_number "1";
1	StringTie	exon	16681212	16681491	1000	-	.	gene_id "MSTRG.319"; transcript_id "MSTRG.319.1"; exon_number "2";
1	StringTie	exon	16659399	16659611	1000	-	.	gene_id "MSTRG.319"; transcript_id "MSTRG.319.2"; exon_number "1";
1	StringTie	exon	16681212	16681491	1000	-	.	gene_id "MSTRG.319"; transcript_id "MSTRG.319.2"; exon_number "2";
1	StringTie	exon	30776372	30776606	1000	+	.	gene_id "MSTRG.572"; transcript_id "MSTRG.572.1"; exon_number "1";
1	StringTie	exon	30780720	30781149	1000	+	.	gene_id "MSTRG.572"; transcript_id "MSTRG.572.1"; exon_number "2";
1	StringTie	exon	43980633	43980923	1000	-	.	gene_id "MSTRG.761"; transcript_id "MSTRG.761.1"; exon_number "1";
1	StringTie	exon	43981338	43981357	1000	-	.	gene_id "MSTRG.761"; transcript_id "MSTRG.761.1"; exon_number "2";
1	StringTie	exon	51496270	51496291	1000	-	.	gene_id "MSTRG.834"; transcript_id "MSTRG.834.1"; exon_number "1";
1	StringTie	exon	51499171	51499483	1000	-	.	gene_id "MSTRG.834"; transcript_id "MSTRG.834.1"; exon_number "2";
1	StringTie	exon	52447424	52447486	1000	+	.	gene_id "MSTRG.852"; transcript_id "MSTRG.852.1"; exon_number "1";
1	StringTie	exon	52459867	52460077	1000	+	.	gene_id "MSTRG.852"; transcript_id "MSTRG.852.1"; exon_number "2";
1	StringTie	exon	82160820	82160982	1000	-	.	gene_id "MSTRG.1242"; transcript_id "MSTRG.1242.1"; exon_number "1";
1	StringTie	exon	82161091	82161393	1000	-	.	gene_id "MSTRG.1242"; transcript_id "MSTRG.1242.1"; exon_number "2";
1	StringTie	exon	106933151	106933434	1000	+	.	gene_id "MSTRG.1497"; transcript_id "MSTRG.1497.1"; exon_number "1";
1	StringTie	exon	106963094	106963961	1000	+	.	gene_id "MSTRG.1497"; transcript_id "MSTRG.1497.1"; exon_number "2";
1	StringTie	exon	107150104	107150369	1000	-	.	gene_id "MSTRG.1509"; transcript_id "MSTRG.1509.1"; exon_number "1";
1	StringTie	exon	107153928	107154187	1000	-	.	gene_id "MSTRG.1509"; transcript_id "MSTRG.1509.1"; exon_number "2";
1	StringTie	exon	107150105	107150369	1000	-	.	gene_id "MSTRG.1509"; transcript_id "MSTRG.1509.2"; exon_number "1";
1	StringTie	exon	107154456	107154546	1000	-	.	gene_id "MSTRG.1509"; transcript_id "MSTRG.1509.2"; exon_number "2";
1	StringTie	exon	108595505	108595862	1000	-	.	gene_id "MSTRG.1541"; transcript_id "MSTRG.1541.1"; exon_number "1";
1	StringTie	exon	108627168	108627275	1000	-	.	gene_id "MSTRG.1541"; transcript_id "MSTRG.1541.1"; exon_number "2";
1	StringTie	exon	109184403	109184564	1000	+	.	gene_id "MSTRG.1558"; transcript_id "MSTRG.1558.1"; exon_number "1";
1	StringTie	exon	109188261	109189089	1000	+	.	gene_id "MSTRG.1558"; transcript_id "MSTRG.1558.1"; exon_number "2";
1	StringTie	exon	109185924	109187537	1000	+	.	gene_id "MSTRG.1558"; transcript_id "MSTRG.1558.2"; exon_number "1";
1	StringTie	exon	109188261	109189089	1000	+	.	gene_id "MSTRG.1558"; transcript_id "MSTRG.1558.2"; exon_number "2";
1	StringTie	exon	115698959	115702479	1000	-	.	gene_id "MSTRG.1813"; transcript_id "MSTRG.1813.1"; exon_number "1";
1	StringTie	exon	115732322	115732439	1000	-	.	gene_id "MSTRG.1813"; transcript_id "MSTRG.1813.1"; exon_number "2";
1	StringTie	exon	115733876	115734281	1000	-	.	gene_id "MSTRG.1813"; transcript_id "MSTRG.1813.1"; exon_number "3";
1	StringTie	exon	127937426	127937489	1000	+	.	gene_id "MSTRG.2039"; transcript_id "MSTRG.2039.1"; exon_number "1";
1	StringTie	exon	127937984	127938196	1000	+	.	gene_id "MSTRG.2039"; transcript_id "MSTRG.2039.1"; exon_number "2";
1	StringTie	exon	138258064	138258110	1000	+	.	gene_id "MSTRG.2297"; transcript_id "MSTRG.2297.1"; exon_number "1";
1	StringTie	exon	138260685	138260788	1000	+	.	gene_id "MSTRG.2297"; transcript_id "MSTRG.2297.1"; exon_number "2";
1	StringTie	exon	138261474	138261645	1000	+	.	gene_id "MSTRG.2297"; transcript_id "MSTRG.2297.1"; exon_number "3";
1	StringTie	exon	138262150	138262930	1000	+	.	gene_id "MSTRG.2297"; transcript_id "MSTRG.2297.1"; exon_number "4";
1	StringTie	exon	148824692	148824817	1000	-	.	gene_id "MSTRG.2409"; transcript_id "MSTRG.2409.1"; exon_number "1";
1	StringTie	exon	148861887	148861990	1000	-	.	gene_id "MSTRG.2409"; transcript_id "MSTRG.2409.1"; exon_number "2";
1	StringTie	exon	148862844	148863008	1000	-	.	gene_id "MSTRG.2409"; transcript_id "MSTRG.2409.1"; exon_number "3";
1	StringTie	exon	179788962	179789013	1000	+	.	gene_id "MSTRG.2773"; transcript_id "MSTRG.2773.1"; exon_number "1";
1	StringTie	exon	179798462	179798579	1000	+	.	gene_id "MSTRG.2773"; transcript_id "MSTRG.2773.1"; exon_number "2";
1	StringTie	exon	179799527	179799724	1000	+	.	gene_id "MSTRG.2773"; transcript_id "MSTRG.2773.1"; exon_number "3";
1	StringTie	exon	179796932	179797086	1000	+	.	gene_id "MSTRG.2773"; transcript_id "MSTRG.2773.2"; exon_number "1";
1	StringTie	exon	179798462	179798579	1000	+	.	gene_id "MSTRG.2773"; transcript_id "MSTRG.2773.2"; exon_number "2";
1	StringTie	exon	179799527	179799853	1000	+	.	gene_id "MSTRG.2773"; transcript_id "MSTRG.2773.2"; exon_number "3";
1	StringTie	exon	179883096	179883211	1000	-	.	gene_id "MSTRG.2775"; transcript_id "MSTRG.2775.1"; exon_number "1";
1	StringTie	exon	179895054	179895276	1000	-	.	gene_id "MSTRG.2775"; transcript_id "MSTRG.2775.1"; exon_number "2";
1	StringTie	exon	183863463	183863629	1000	+	.	gene_id "MSTRG.2853"; transcript_id "MSTRG.2853.1"; exon_number "1";
1	StringTie	exon	183872064	183872176	1000	+	.	gene_id "MSTRG.2853"; transcript_id "MSTRG.2853.1"; exon_number "2";
1	StringTie	exon	186524283	186524372	1000	-	.	gene_id "MSTRG.2927"; transcript_id "MSTRG.2927.1"; exon_number "1";
1	StringTie	exon	186529198	186529671	1000	-	.	gene_id "MSTRG.2927"; transcript_id "MSTRG.2927.1"; exon_number "2";
1	StringTie	exon	201473172	201473738	1000	+	.	gene_id "MSTRG.3177"; transcript_id "MSTRG.3177.1"; exon_number "1";
1	StringTie	exon	201475715	201475897	1000	+	.	gene_id "MSTRG.3177"; transcript_id "MSTRG.3177.1"; exon_number "2";
1	StringTie	exon	201473172	201473697	1000	+	.	gene_id "MSTRG.3177"; transcript_id "MSTRG.3177.2"; exon_number "1";
1	StringTie	exon	201475715	201475845	1000	+	.	gene_id "MSTRG.3177"; transcript_id "MSTRG.3177.2"; exon_number "2";
1	StringTie	exon	213147552	213147844	1000	-	.	gene_id "MSTRG.3379"; transcript_id "MSTRG.3379.1"; exon_number "1";
1	StringTie	exon	213194384	213195062	1000	-	.	gene_id "MSTRG.3379"; transcript_id "MSTRG.3379.1"; exon_number "2";
1	StringTie	exon	229871932	229873193	1000	-	.	gene_id "MSTRG.3631"; transcript_id "MSTRG.3631.1"; exon_number "1";
1	StringTie	exon	229928721	229928855	1000	-	.	gene_id "MSTRG.3631"; transcript_id "MSTRG.3631.1"; exon_number "2";
1	StringTie	exon	229952108	229952245	1000	-	.	gene_id "MSTRG.3631"; transcript_id "MSTRG.3631.1"; exon_number "3";
1	StringTie	exon	229955621	229955811	1000	-	.	gene_id "MSTRG.3631"; transcript_id "MSTRG.3631.1"; exon_number "4";
1	StringTie	exon	247060447	247061877	1000	-	.	gene_id "MSTRG.3931"; transcript_id "MSTRG.3931.1"; exon_number "1";
1	StringTie	exon	247062461	247062491	1000	-	.	gene_id "MSTRG.3931"; transcript_id "MSTRG.3931.1"; exon_number "2";
1	StringTie	exon	247063941	247064003	1000	-	.	gene_id "MSTRG.3931"; transcript_id "MSTRG.3931.1"; exon_number "3";
1	StringTie	exon	247069851	247069977	1000	-	.	gene_id "MSTRG.3931"; transcript_id "MSTRG.3931.1"; exon_number "4";
1	StringTie	exon	264223330	264223643	1000	+	.	gene_id "MSTRG.4184"; transcript_id "MSTRG.4184.1"; exon_number "1";
1	StringTie	exon	264228418	264228767	1000	+	.	gene_id "MSTRG.4184"; transcript_id "MSTRG.4184.1"; exon_number "2";
1	StringTie	exon	264230952	264231139	1000	+	.	gene_id "MSTRG.4184"; transcript_id "MSTRG.4184.1"; exon_number "3";
1	StringTie	exon	264237266	264237373	1000	+	.	gene_id "MSTRG.4184"; transcript_id "MSTRG.4184.1"; exon_number "4";
1	StringTie	exon	264223330	264223643	1000	+	.	gene_id "MSTRG.4184"; transcript_id "MSTRG.4184.2"; exon_number "1";
1	StringTie	exon	264228418	264228767	1000	+	.	gene_id "MSTRG.4184"; transcript_id "MSTRG.4184.2"; exon_number "2";
1	StringTie	exon	264237266	264237373	1000	+	.	gene_id "MSTRG.4184"; transcript_id "MSTRG.4184.2"; exon_number "3";
1	StringTie	exon	267187495	267188184	1000	-	.	gene_id "MSTRG.4258"; transcript_id "MSTRG.4258.1"; exon_number "1";
1	StringTie	exon	267206568	267206909	1000	-	.	gene_id "MSTRG.4258"; transcript_id "MSTRG.4258.1"; exon_number "2";
1	StringTie	exon	267187495	267187794	1000	-	.	gene_id "MSTRG.4258"; transcript_id "MSTRG.4258.2"; exon_number "1";
1	StringTie	exon	267188031	267188526	1000	-	.	gene_id "MSTRG.4258"; transcript_id "MSTRG.4258.2"; exon_number "2";
1	StringTie	exon	269575591	269575624	1000	+	.	gene_id "MSTRG.4362"; transcript_id "MSTRG.4362.1"; exon_number "1";
1	StringTie	exon	269583521	269583665	1000	+	.	gene_id "MSTRG.4362"; transcript_id "MSTRG.4362.1"; exon_number "2";
1	StringTie	exon	269586036	269586393	1000	+	.	gene_id "MSTRG.4362"; transcript_id "MSTRG.4362.1"; exon_number "3";
1	StringTie	exon	269575818	269575907	1000	+	.	gene_id "MSTRG.4362"; transcript_id "MSTRG.4362.2"; exon_number "1";
1	StringTie	exon	269583521	269583665	1000	+	.	gene_id "MSTRG.4362"; transcript_id "MSTRG.4362.2"; exon_number "2";
1	StringTie	exon	269586036	269586393	1000	+	.	gene_id "MSTRG.4362"; transcript_id "MSTRG.4362.2"; exon_number "3";
1	StringTie	exon	269580198	269580403	1000	+	.	gene_id "MSTRG.4362"; transcript_id "MSTRG.4362.3"; exon_number "1";
1	StringTie	exon	269583521	269583665	1000	+	.	gene_id "MSTRG.4362"; transcript_id "MSTRG.4362.3"; exon_number "2";
1	StringTie	exon	269586036	269586392	1000	+	.	gene_id "MSTRG.4362"; transcript_id "MSTRG.4362.3"; exon_number "3";
1	StringTie	exon	270180306	270181074	1000	+	.	gene_id "MSTRG.4392"; transcript_id "MSTRG.4392.1"; exon_number "1";
1	StringTie	exon	270182034	270182641	1000	+	.	gene_id "MSTRG.4392"; transcript_id "MSTRG.4392.1"; exon_number "2";
1	StringTie	exon	273558493	273559118	1000	-	.	gene_id "MSTRG.4478"; transcript_id "MSTRG.4478.1"; exon_number "1";
1	StringTie	exon	273559720	273559893	1000	-	.	gene_id "MSTRG.4478"; transcript_id "MSTRG.4478.1"; exon_number "2";
10	StringTie	exon	1675211	1675268	1000	+	.	gene_id "MSTRG.4528"; transcript_id "MSTRG.4528.1"; exon_number "1";
10	StringTie	exon	1679829	1679872	1000	+	.	gene_id "MSTRG.4528"; transcript_id "MSTRG.4528.1"; exon_number "2";
10	StringTie	exon	1680752	1681192	1000	+	.	gene_id "MSTRG.4528"; transcript_id "MSTRG.4528.1"; exon_number "3";
10	StringTie	exon	8493579	8493636	1000	+	.	gene_id "MSTRG.4573"; transcript_id "MSTRG.4573.1"; exon_number "1";
10	StringTie	exon	8496450	8496641	1000	+	.	gene_id "MSTRG.4573"; transcript_id "MSTRG.4573.1"; exon_number "2";
10	StringTie	exon	8543970	8544065	1000	-	.	gene_id "MSTRG.4575"; transcript_id "MSTRG.4575.1"; exon_number "1";
10	StringTie	exon	8552076	8552240	1000	-	.	gene_id "MSTRG.4575"; transcript_id "MSTRG.4575.1"; exon_number "2";
10	StringTie	exon	10132534	10132636	1000	+	.	gene_id "MSTRG.4619"; transcript_id "MSTRG.4619.1"; exon_number "1";
10	StringTie	exon	10147679	10147771	1000	+	.	gene_id "MSTRG.4619"; transcript_id "MSTRG.4619.1"; exon_number "2";
10	StringTie	exon	10150813	10150907	1000	+	.	gene_id "MSTRG.4619"; transcript_id "MSTRG.4619.1"; exon_number "3";
10	StringTie	exon	10153386	10153627	1000	+	.	gene_id "MSTRG.4619"; transcript_id "MSTRG.4619.1"; exon_number "4";
10	StringTie	exon	12434778	12435435	1000	-	.	gene_id "MSTRG.4710"; transcript_id "MSTRG.4710.1"; exon_number "1";
10	StringTie	exon	12438204	12438733	1000	-	.	gene_id "MSTRG.4710"; transcript_id "MSTRG.4710.1"; exon_number "2";
10	StringTie	exon	12756740	12756783	1000	+	.	gene_id "MSTRG.4718"; transcript_id "MSTRG.4718.2"; exon_number "1";
10	StringTie	exon	12774671	12774865	1000	+	.	gene_id "MSTRG.4718"; transcript_id "MSTRG.4718.2"; exon_number "2";
10	StringTie	exon	12790201	12790318	1000	+	.	gene_id "MSTRG.4718"; transcript_id "MSTRG.4718.2"; exon_number "3";
10	StringTie	exon	12791094	12791379	1000	+	.	gene_id "MSTRG.4718"; transcript_id "MSTRG.4718.2"; exon_number "4";
10	StringTie	exon	13965279	13965366	1000	+	.	gene_id "MSTRG.4747"; transcript_id "MSTRG.4747.1"; exon_number "1";
10	StringTie	exon	13968931	13969041	1000	+	.	gene_id "MSTRG.4747"; transcript_id "MSTRG.4747.1"; exon_number "2";
10	StringTie	exon	13970101	13970367	1000	+	.	gene_id "MSTRG.4747"; transcript_id "MSTRG.4747.1"; exon_number "3";
10	StringTie	exon	14467736	14467888	1000	-	.	gene_id "MSTRG.4759"; transcript_id "MSTRG.4759.1"; exon_number "1";
10	StringTie	exon	14469280	14469666	1000	-	.	gene_id "MSTRG.4759"; transcript_id "MSTRG.4759.1"; exon_number "2";
10	StringTie	exon	22923825	22923852	1000	-	.	gene_id "MSTRG.4876"; transcript_id "MSTRG.4876.1"; exon_number "1";
10	StringTie	exon	22977805	22978491	1000	-	.	gene_id "MSTRG.4876"; transcript_id "MSTRG.4876.1"; exon_number "2";
10	StringTie	exon	28472619	28472861	1000	-	.	gene_id "MSTRG.4996"; transcript_id "MSTRG.4996.1"; exon_number "1";
10	StringTie	exon	28477416	28478315	1000	-	.	gene_id "MSTRG.4996"; transcript_id "MSTRG.4996.1"; exon_number "2";
10	StringTie	exon	28866213	28866629	1000	+	.	gene_id "MSTRG.5099"; transcript_id "MSTRG.5099.1"; exon_number "1";
10	StringTie	exon	28874038	28874365	1000	+	.	gene_id "MSTRG.5099"; transcript_id "MSTRG.5099.1"; exon_number "2";
10	StringTie	exon	33279651	33279682	1000	+	.	gene_id "MSTRG.5161"; transcript_id "MSTRG.5161.1"; exon_number "1";
10	StringTie	exon	33313269	33313535	1000	+	.	gene_id "MSTRG.5161"; transcript_id "MSTRG.5161.1"; exon_number "2";
10	StringTie	exon	33297998	33298069	1000	+	.	gene_id "MSTRG.5161"; transcript_id "MSTRG.5161.2"; exon_number "1";
10	StringTie	exon	33313269	33313521	1000	+	.	gene_id "MSTRG.5161"; transcript_id "MSTRG.5161.2"; exon_number "2";
10	StringTie	exon	39893376	39893837	1000	-	.	gene_id "MSTRG.5279"; transcript_id "MSTRG.5279.1"; exon_number "1";
10	StringTie	exon	39893917	39895206	1000	-	.	gene_id "MSTRG.5279"; transcript_id "MSTRG.5279.1"; exon_number "2";
10	StringTie	exon	40881258	40882087	1000	-	.	gene_id "MSTRG.5330"; transcript_id "MSTRG.5330.1"; exon_number "1";
10	StringTie	exon	40884706	40884838	1000	-	.	gene_id "MSTRG.5330"; transcript_id "MSTRG.5330.1"; exon_number "2";
10	StringTie	exon	41783203	41783334	1000	-	.	gene_id "MSTRG.5340"; transcript_id "MSTRG.5340.1"; exon_number "1";
10	StringTie	exon	41783812	41784034	1000	-	.	gene_id "MSTRG.5340"; transcript_id "MSTRG.5340.1"; exon_number "2";
10	StringTie	exon	41784693	41784999	1000	-	.	gene_id "MSTRG.5342"; transcript_id "MSTRG.5342.1"; exon_number "1";
10	StringTie	exon	41787418	41787509	1000	-	.	gene_id "MSTRG.5342"; transcript_id "MSTRG.5342.1"; exon_number "2";
10	StringTie	exon	44885897	44886642	1000	-	.	gene_id "MSTRG.5421"; transcript_id "MSTRG.5421.1"; exon_number "1";
10	StringTie	exon	44888385	44888635	1000	-	.	gene_id "MSTRG.5421"; transcript_id "MSTRG.5421.1"; exon_number "2";
10	StringTie	exon	48342688	48342877	1000	+	.	gene_id "MSTRG.5467"; transcript_id "MSTRG.5467.1"; exon_number "1";
10	StringTie	exon	48343233	48343258	1000	+	.	gene_id "MSTRG.5467"; transcript_id "MSTRG.5467.1"; exon_number "2";
10	StringTie	exon	50361649	50362259	1000	-	.	gene_id "MSTRG.5499"; transcript_id "MSTRG.5499.1"; exon_number "1";
10	StringTie	exon	50362740	50362975	1000	-	.	gene_id "MSTRG.5499"; transcript_id "MSTRG.5499.1"; exon_number "2";
10	StringTie	exon	51457009	51457283	1000	-	.	gene_id "MSTRG.5520"; transcript_id "MSTRG.5520.1"; exon_number "1";
10	StringTie	exon	51485849	51486068	1000	-	.	gene_id "MSTRG.5520"; transcript_id "MSTRG.5520.1"; exon_number "2";
10	StringTie	exon	51498162	51498272	1000	-	.	gene_id "MSTRG.5522"; transcript_id "MSTRG.5522.1"; exon_number "1";
10	StringTie	exon	51498917	51499091	1000	-	.	gene_id "MSTRG.5522"; transcript_id "MSTRG.5522.1"; exon_number "2";
10	StringTie	exon	51510940	51511116	1000	-	.	gene_id "MSTRG.5522"; transcript_id "MSTRG.5522.1"; exon_number "3";
10	StringTie	exon	56768710	56770078	1000	-	.	gene_id "MSTRG.5642"; transcript_id "MSTRG.5642.1"; exon_number "1";
10	StringTie	exon	56770784	56771360	1000	-	.	gene_id "MSTRG.5642"; transcript_id "MSTRG.5642.1"; exon_number "2";
10	StringTie	exon	56440907	56440959	1000	+	.	gene_id "MSTRG.5648"; transcript_id "MSTRG.5648.1"; exon_number "1";
10	StringTie	exon	56459933	56460295	1000	+	.	gene_id "MSTRG.5648"; transcript_id "MSTRG.5648.1"; exon_number "2";
10	StringTie	exon	62491790	62492913	1000	-	.	gene_id "MSTRG.5710"; transcript_id "MSTRG.5710.1"; exon_number "1";
10	StringTie	exon	62503888	62504018	1000	-	.	gene_id "MSTRG.5710"; transcript_id "MSTRG.5710.1"; exon_number "2";
10	StringTie	exon	62541030	62541249	1000	-	.	gene_id "MSTRG.5710"; transcript_id "MSTRG.5710.1"; exon_number "3";
10	StringTie	exon	62492638	62492913	1000	-	.	gene_id "MSTRG.5710"; transcript_id "MSTRG.5710.2"; exon_number "1";
10	StringTie	exon	62496612	62496704	1000	-	.	gene_id "MSTRG.5710"; transcript_id "MSTRG.5710.2"; exon_number "2";
10	StringTie	exon	62503888	62504018	1000	-	.	gene_id "MSTRG.5710"; transcript_id "MSTRG.5710.2"; exon_number "3";
10	StringTie	exon	62541030	62541220	1000	-	.	gene_id "MSTRG.5710"; transcript_id "MSTRG.5710.2"; exon_number "4";
10	StringTie	exon	63780189	63781609	1000	-	.	gene_id "MSTRG.5731"; transcript_id "MSTRG.5731.1"; exon_number "1";
10	StringTie	exon	63783077	63783388	1000	-	.	gene_id "MSTRG.5731"; transcript_id "MSTRG.5731.1"; exon_number "2";
10	StringTie	exon	69305117	69305146	1000	+	.	gene_id "MSTRG.5823"; transcript_id "MSTRG.5823.1"; exon_number "1";
10	StringTie	exon	69315900	69316019	1000	+	.	gene_id "MSTRG.5823"; transcript_id "MSTRG.5823.1"; exon_number "2";
10	StringTie	exon	69316706	69316821	1000	+	.	gene_id "MSTRG.5823"; transcript_id "MSTRG.5823.1"; exon_number "3";
11	StringTie	exon	7084242	7084349	1000	-	.	gene_id "MSTRG.6012"; transcript_id "MSTRG.6012.1"; exon_number "1";
11	StringTie	exon	7085131	7085317	1000	-	.	gene_id "MSTRG.6012"; transcript_id "MSTRG.6012.1"; exon_number "2";
11	StringTie	exon	7159168	7159829	1000	-	.	gene_id "MSTRG.6027"; transcript_id "MSTRG.6027.1"; exon_number "1";
11	StringTie	exon	7162177	7162244	1000	-	.	gene_id "MSTRG.6027"; transcript_id "MSTRG.6027.1"; exon_number "2";
11	StringTie	exon	7165268	7165379	1000	-	.	gene_id "MSTRG.6027"; transcript_id "MSTRG.6027.1"; exon_number "3";
11	StringTie	exon	7167216	7167356	1000	-	.	gene_id "MSTRG.6027"; transcript_id "MSTRG.6027.1"; exon_number "4";
11	StringTie	exon	9814132	9814714	1000	-	.	gene_id "MSTRG.6138"; transcript_id "MSTRG.6138.1"; exon_number "1";
11	StringTie	exon	9815799	9816665	1000	-	.	gene_id "MSTRG.6138"; transcript_id "MSTRG.6138.1"; exon_number "2";
11	StringTie	exon	9884487	9885089	1000	+	.	gene_id "MSTRG.6140"; transcript_id "MSTRG.6140.1"; exon_number "1";
11	StringTie	exon	9885372	9885403	1000	+	.	gene_id "MSTRG.6140"; transcript_id "MSTRG.6140.1"; exon_number "2";
11	StringTie	exon	16317209	16318494	1000	+	.	gene_id "MSTRG.6272"; transcript_id "MSTRG.6272.1"; exon_number "1";
11	StringTie	exon	16318521	16319656	1000	+	.	gene_id "MSTRG.6272"; transcript_id "MSTRG.6272.1"; exon_number "2";
11	StringTie	exon	18425460	18426102	1000	-	.	gene_id "MSTRG.6331"; transcript_id "MSTRG.6331.1"; exon_number "1";
11	StringTie	exon	18459324	18459444	1000	-	.	gene_id "MSTRG.6331"; transcript_id "MSTRG.6331.1"; exon_number "2";
11	StringTie	exon	18461318	18461641	1000	-	.	gene_id "MSTRG.6331"; transcript_id "MSTRG.6331.1"; exon_number "3";
11	StringTie	exon	18518180	18518250	1000	+	.	gene_id "MSTRG.6335"; transcript_id "MSTRG.6335.1"; exon_number "1";
11	StringTie	exon	18519438	18519654	1000	+	.	gene_id "MSTRG.6335"; transcript_id "MSTRG.6335.1"; exon_number "2";
11	StringTie	exon	18114766	18114863	1000	+	.	gene_id "MSTRG.6349"; transcript_id "MSTRG.6349.1"; exon_number "1";
11	StringTie	exon	18129422	18130623	1000	+	.	gene_id "MSTRG.6349"; transcript_id "MSTRG.6349.1"; exon_number "2";
11	StringTie	exon	18125620	18126110	1000	+	.	gene_id "MSTRG.6349"; transcript_id "MSTRG.6349.3"; exon_number "1";
11	StringTie	exon	18129422	18129588	1000	+	.	gene_id "MSTRG.6349"; transcript_id "MSTRG.6349.3"; exon_number "2";
11	StringTie	exon	33256583	33257350	1000	-	.	gene_id "MSTRG.6565"; transcript_id "MSTRG.6565.2"; exon_number "1";
11	StringTie	exon	33257732	33257965	1000	-	.	gene_id "MSTRG.6565"; transcript_id "MSTRG.6565.2"; exon_number "2";
11	StringTie	exon	46462824	46462940	1000	+	.	gene_id "MSTRG.6580"; transcript_id "MSTRG.6580.1"; exon_number "1";
11	StringTie	exon	46468759	46469275	1000	+	.	gene_id "MSTRG.6580"; transcript_id "MSTRG.6580.1"; exon_number "2";
11	StringTie	exon	52159660	52159999	1000	-	.	gene_id "MSTRG.6698"; transcript_id "MSTRG.6698.1"; exon_number "1";
11	StringTie	exon	52160296	52160504	1000	-	.	gene_id "MSTRG.6698"; transcript_id "MSTRG.6698.1"; exon_number "2";
11	StringTie	exon	55434583	55435185	1000	-	.	gene_id "MSTRG.6744"; transcript_id "MSTRG.6744.1"; exon_number "1";
11	StringTie	exon	55444211	55444302	1000	-	.	gene_id "MSTRG.6744"; transcript_id "MSTRG.6744.1"; exon_number "2";
11	StringTie	exon	55471466	55471598	1000	-	.	gene_id "MSTRG.6744"; transcript_id "MSTRG.6744.1"; exon_number "3";
11	StringTie	exon	55520530	55522639	1000	-	.	gene_id "MSTRG.6744"; transcript_id "MSTRG.6744.1"; exon_number "4";
11	StringTie	exon	55598848	55599667	1000	-	.	gene_id "MSTRG.6758"; transcript_id "MSTRG.6758.1"; exon_number "1";
11	StringTie	exon	55642015	55642084	1000	-	.	gene_id "MSTRG.6758"; transcript_id "MSTRG.6758.1"; exon_number "2";
11	StringTie	exon	55691449	55691565	1000	-	.	gene_id "MSTRG.6758"; transcript_id "MSTRG.6758.1"; exon_number "3";
11	StringTie	exon	55696086	55696437	1000	-	.	gene_id "MSTRG.6758"; transcript_id "MSTRG.6758.1"; exon_number "4";
11	StringTie	exon	55598848	55599667	1000	-	.	gene_id "MSTRG.6758"; transcript_id "MSTRG.6758.2"; exon_number "1";
11	StringTie	exon	55603962	55605058	1000	-	.	gene_id "MSTRG.6758"; transcript_id "MSTRG.6758.2"; exon_number "2";
11	StringTie	exon	55598861	55599667	1000	-	.	gene_id "MSTRG.6758"; transcript_id "MSTRG.6758.3"; exon_number "1";
11	StringTie	exon	55642015	55642084	1000	-	.	gene_id "MSTRG.6758"; transcript_id "MSTRG.6758.3"; exon_number "2";
11	StringTie	exon	55691449	55691565	1000	-	.	gene_id "MSTRG.6758"; transcript_id "MSTRG.6758.3"; exon_number "3";
11	StringTie	exon	55696189	55696428	1000	-	.	gene_id "MSTRG.6758"; transcript_id "MSTRG.6758.3"; exon_number "4";
11	StringTie	exon	58941767	58941808	1000	+	.	gene_id "MSTRG.6767"; transcript_id "MSTRG.6767.1"; exon_number "1";
11	StringTie	exon	58941906	58942026	1000	+	.	gene_id "MSTRG.6767"; transcript_id "MSTRG.6767.1"; exon_number "2";
11	StringTie	exon	58942573	58942660	1000	+	.	gene_id "MSTRG.6767"; transcript_id "MSTRG.6767.1"; exon_number "3";
11	StringTie	exon	58959902	58959952	1000	+	.	gene_id "MSTRG.6767"; transcript_id "MSTRG.6767.1"; exon_number "4";
11	StringTie	exon	58961252	58961298	1000	+	.	gene_id "MSTRG.6767"; transcript_id "MSTRG.6767.1"; exon_number "5";
11	StringTie	exon	59169137	59169272	1000	+	.	gene_id "MSTRG.6767"; transcript_id "MSTRG.6767.1"; exon_number "6";
11	StringTie	exon	59180156	59180267	1000	+	.	gene_id "MSTRG.6767"; transcript_id "MSTRG.6767.1"; exon_number "7";
11	StringTie	exon	73878618	73878784	1000	+	.	gene_id "MSTRG.6872"; transcript_id "MSTRG.6872.1"; exon_number "1";
11	StringTie	exon	73883760	73884355	1000	+	.	gene_id "MSTRG.6872"; transcript_id "MSTRG.6872.1"; exon_number "2";
11	StringTie	exon	76512467	76512789	1000	-	.	gene_id "MSTRG.6904"; transcript_id "MSTRG.6904.1"; exon_number "1";
11	StringTie	exon	76514441	76514540	1000	-	.	gene_id "MSTRG.6904"; transcript_id "MSTRG.6904.1"; exon_number "2";
11	StringTie	exon	76514346	76514572	1000	+	.	gene_id "MSTRG.6905"; transcript_id "MSTRG.6905.1"; exon_number "1";
11	StringTie	exon	76516721	76517055	1000	+	.	gene_id "MSTRG.6905"; transcript_id "MSTRG.6905.1"; exon_number "2";
11	StringTie	exon	78751841	78752567	1000	-	.	gene_id "MSTRG.6948"; transcript_id "MSTRG.6948.1"; exon_number "1";
11	StringTie	exon	78754238	78754440	1000	-	.	gene_id "MSTRG.6948"; transcript_id "MSTRG.6948.1"; exon_number "2";
12	StringTie	exon	1157370	1158760	1000	+	.	gene_id "MSTRG.7054"; transcript_id "MSTRG.7054.1"; exon_number "1";
12	StringTie	exon	1167623	1168467	1000	+	.	gene_id "MSTRG.7054"; transcript_id "MSTRG.7054.1"; exon_number "2";
12	StringTie	exon	1168810	1169030	1000	+	.	gene_id "MSTRG.7054"; transcript_id "MSTRG.7054.1"; exon_number "3";
12	StringTie	exon	1171959	1172091	1000	+	.	gene_id "MSTRG.7054"; transcript_id "MSTRG.7054.1"; exon_number "4";
12	StringTie	exon	1189655	1192130	1000	+	.	gene_id "MSTRG.7054"; transcript_id "MSTRG.7054.1"; exon_number "5";
12	StringTie	exon	1158477	1158801	1000	+	.	gene_id "MSTRG.7054"; transcript_id "MSTRG.7054.3"; exon_number "1";
12	StringTie	exon	1165681	1165862	1000	+	.	gene_id "MSTRG.7054"; transcript_id "MSTRG.7054.3"; exon_number "2";
12	StringTie	exon	1167623	1168467	1000	+	.	gene_id "MSTRG.7054"; transcript_id "MSTRG.7054.3"; exon_number "3";
12	StringTie	exon	1168810	1169030	1000	+	.	gene_id "MSTRG.7054"; transcript_id "MSTRG.7054.3"; exon_number "4";
12	StringTie	exon	1170788	1171382	1000	+	.	gene_id "MSTRG.7054"; transcript_id "MSTRG.7054.3"; exon_number "5";
12	StringTie	exon	1191313	1191529	1000	+	.	gene_id "MSTRG.7054"; transcript_id "MSTRG.7054.5"; exon_number "1";
12	StringTie	exon	1191674	1192130	1000	+	.	gene_id "MSTRG.7054"; transcript_id "MSTRG.7054.5"; exon_number "2";
12	StringTie	exon	2532398	2532504	1000	-	.	gene_id "MSTRG.7074"; transcript_id "MSTRG.7074.1"; exon_number "1";
12	StringTie	exon	2533293	2533454	1000	-	.	gene_id "MSTRG.7074"; transcript_id "MSTRG.7074.1"; exon_number "2";
12	StringTie	exon	2533844	2533868	1000	-	.	gene_id "MSTRG.7074"; transcript_id "MSTRG.7074.1"; exon_number "3";
12	StringTie	exon	2542411	2542581	1000	-	.	gene_id "MSTRG.7076"; transcript_id "MSTRG.7076.1"; exon_number "1";
12	StringTie	exon	2543593	2543937	1000	-	.	gene_id "MSTRG.7076"; transcript_id "MSTRG.7076.1"; exon_number "2";
12	StringTie	exon	6559718	6559959	1000	+	.	gene_id "MSTRG.7191"; transcript_id "MSTRG.7191.1"; exon_number "1";
12	StringTie	exon	6562298	6562315	1000	+	.	gene_id "MSTRG.7191"; transcript_id "MSTRG.7191.1"; exon_number "2";
12	StringTie	exon	8726028	8726953	1000	+	.	gene_id "MSTRG.7254"; transcript_id "MSTRG.7254.2"; exon_number "1";
12	StringTie	exon	8728191	8728908	1000	+	.	gene_id "MSTRG.7254"; transcript_id "MSTRG.7254.2"; exon_number "2";
12	StringTie	exon	10063171	10063315	1000	+	.	gene_id "MSTRG.7256"; transcript_id "MSTRG.7256.1"; exon_number "1";
12	StringTie	exon	10067508	10067610	1000	+	.	gene_id "MSTRG.7256"; transcript_id "MSTRG.7256.1"; exon_number "2";
12	StringTie	exon	7686088	7686653	1000	+	.	gene_id "MSTRG.7268"; transcript_id "MSTRG.7268.1"; exon_number "1";
12	StringTie	exon	7688075	7688791	1000	+	.	gene_id "MSTRG.7268"; transcript_id "MSTRG.7268.1"; exon_number "2";
12	StringTie	exon	12181031	12181211	1000	+	.	gene_id "MSTRG.7296"; transcript_id "MSTRG.7296.1"; exon_number "1";
12	StringTie	exon	12190752	12191418	1000	+	.	gene_id "MSTRG.7296"; transcript_id "MSTRG.7296.1"; exon_number "2";
12	StringTie	exon	13458549	13458697	1000	-	.	gene_id "MSTRG.7306"; transcript_id "MSTRG.7306.1"; exon_number "1";
12	StringTie	exon	13459009	13459063	1000	-	.	gene_id "MSTRG.7306"; transcript_id "MSTRG.7306.1"; exon_number "2";
12	StringTie	exon	14725167	14725422	1000	+	.	gene_id "MSTRG.7361"; transcript_id "MSTRG.7361.1"; exon_number "1";
12	StringTie	exon	14735009	14735292	1000	+	.	gene_id "MSTRG.7361"; transcript_id "MSTRG.7361.1"; exon_number "2";
12	StringTie	exon	14725167	14725422	1000	+	.	gene_id "MSTRG.7361"; transcript_id "MSTRG.7361.2"; exon_number "1";
12	StringTie	exon	14728201	14728348	1000	+	.	gene_id "MSTRG.7361"; transcript_id "MSTRG.7361.2"; exon_number "2";
12	StringTie	exon	14735009	14735292	1000	+	.	gene_id "MSTRG.7361"; transcript_id "MSTRG.7361.2"; exon_number "3";
12	StringTie	exon	19585718	19585838	1000	+	.	gene_id "MSTRG.7534"; transcript_id "MSTRG.7534.1"; exon_number "1";
12	StringTie	exon	19592985	19593111	1000	+	.	gene_id "MSTRG.7534"; transcript_id "MSTRG.7534.1"; exon_number "2";
12	StringTie	exon	20012323	20012504	1000	+	.	gene_id "MSTRG.7557"; transcript_id "MSTRG.7557.1"; exon_number "1";
12	StringTie	exon	20012923	20013544	1000	+	.	gene_id "MSTRG.7557"; transcript_id "MSTRG.7557.1"; exon_number "2";
12	StringTie	exon	20104289	20104553	1000	-	.	gene_id "MSTRG.7563"; transcript_id "MSTRG.7563.5"; exon_number "1";
12	StringTie	exon	20107896	20108075	1000	-	.	gene_id "MSTRG.7563"; transcript_id "MSTRG.7563.5"; exon_number "2";
12	StringTie	exon	24293029	24293168	1000	+	.	gene_id "MSTRG.7711"; transcript_id "MSTRG.7711.1"; exon_number "1";
12	StringTie	exon	24294498	24294782	1000	+	.	gene_id "MSTRG.7711"; transcript_id "MSTRG.7711.1"; exon_number "2";
12	StringTie	exon	24293061	24293168	1000	+	.	gene_id "MSTRG.7711"; transcript_id "MSTRG.7711.2"; exon_number "1";
12	StringTie	exon	24294552	24294782	1000	+	.	gene_id "MSTRG.7711"; transcript_id "MSTRG.7711.2"; exon_number "2";
12	StringTie	exon	24191465	24191675	1000	-	.	gene_id "MSTRG.7726"; transcript_id "MSTRG.7726.1"; exon_number "1";
12	StringTie	exon	24191776	24191825	1000	-	.	gene_id "MSTRG.7726"; transcript_id "MSTRG.7726.1"; exon_number "2";
12	StringTie	exon	24192665	24192726	1000	-	.	gene_id "MSTRG.7726"; transcript_id "MSTRG.7726.1"; exon_number "3";
12	StringTie	exon	26606896	26607221	1000	-	.	gene_id "MSTRG.7797"; transcript_id "MSTRG.7797.1"; exon_number "1";
12	StringTie	exon	26619942	26620170	1000	-	.	gene_id "MSTRG.7797"; transcript_id "MSTRG.7797.1"; exon_number "2";
12	StringTie	exon	26622810	26622942	1000	-	.	gene_id "MSTRG.7797"; transcript_id "MSTRG.7797.1"; exon_number "3";
12	StringTie	exon	26606897	26607807	1000	-	.	gene_id "MSTRG.7797"; transcript_id "MSTRG.7797.2"; exon_number "1";
12	StringTie	exon	26619942	26620170	1000	-	.	gene_id "MSTRG.7797"; transcript_id "MSTRG.7797.2"; exon_number "2";
12	StringTie	exon	26622810	26622942	1000	-	.	gene_id "MSTRG.7797"; transcript_id "MSTRG.7797.2"; exon_number "3";
12	StringTie	exon	27169152	27169322	1000	+	.	gene_id "MSTRG.7819"; transcript_id "MSTRG.7819.2"; exon_number "1";
12	StringTie	exon	27169999	27170536	1000	+	.	gene_id "MSTRG.7819"; transcript_id "MSTRG.7819.2"; exon_number "2";
12	StringTie	exon	33212481	33212854	1000	+	.	gene_id "MSTRG.7868"; transcript_id "MSTRG.7868.1"; exon_number "1";
12	StringTie	exon	33214082	33214688	1000	+	.	gene_id "MSTRG.7868"; transcript_id "MSTRG.7868.1"; exon_number "2";
12	StringTie	exon	33212503	33212828	1000	+	.	gene_id "MSTRG.7868"; transcript_id "MSTRG.7868.2"; exon_number "1";
12	StringTie	exon	33214082	33214277	1000	+	.	gene_id "MSTRG.7868"; transcript_id "MSTRG.7868.2"; exon_number "2";
12	StringTie	exon	33214584	33214710	1000	+	.	gene_id "MSTRG.7868"; transcript_id "MSTRG.7868.2"; exon_number "3";
12	StringTie	exon	33212503	33212854	1000	+	.	gene_id "MSTRG.7868"; transcript_id "MSTRG.7868.3"; exon_number "1";
12	StringTie	exon	33214082	33214277	1000	+	.	gene_id "MSTRG.7868"; transcript_id "MSTRG.7868.3"; exon_number "2";
12	StringTie	exon	33214584	33214710	1000	+	.	gene_id "MSTRG.7868"; transcript_id "MSTRG.7868.3"; exon_number "3";
12	StringTie	exon	33526513	33526936	1000	-	.	gene_id "MSTRG.7878"; transcript_id "MSTRG.7878.1"; exon_number "1";
12	StringTie	exon	33531931	33531981	1000	-	.	gene_id "MSTRG.7878"; transcript_id "MSTRG.7878.1"; exon_number "2";
12	StringTie	exon	34284645	34285434	1000	+	.	gene_id "MSTRG.7904"; transcript_id "MSTRG.7904.1"; exon_number "1";
12	StringTie	exon	34285494	34285926	1000	+	.	gene_id "MSTRG.7904"; transcript_id "MSTRG.7904.1"; exon_number "2";
12	StringTie	exon	39436270	39436535	1000	-	.	gene_id "MSTRG.8027"; transcript_id "MSTRG.8027.1"; exon_number "1";
12	StringTie	exon	39450346	39450475	1000	-	.	gene_id "MSTRG.8027"; transcript_id "MSTRG.8027.1"; exon_number "2";
12	StringTie	exon	46607706	46609603	1000	-	.	gene_id "MSTRG.8250"; transcript_id "MSTRG.8250.1"; exon_number "1";
12	StringTie	exon	46616515	46617000	1000	-	.	gene_id "MSTRG.8250"; transcript_id "MSTRG.8250.1"; exon_number "2";
12	StringTie	exon	52434608	52435016	1000	-	.	gene_id "MSTRG.8495"; transcript_id "MSTRG.8495.2"; exon_number "1";
12	StringTie	exon	52435318	52435468	1000	-	.	gene_id "MSTRG.8495"; transcript_id "MSTRG.8495.2"; exon_number "2";
12	StringTie	exon	52435892	52435959	1000	-	.	gene_id "MSTRG.8495"; transcript_id "MSTRG.8495.2"; exon_number "3";
12	StringTie	exon	57975725	57976278	1000	-	.	gene_id "MSTRG.8638"; transcript_id "MSTRG.8638.1"; exon_number "1";
12	StringTie	exon	57977537	57977631	1000	-	.	gene_id "MSTRG.8638"; transcript_id "MSTRG.8638.1"; exon_number "2";
12	StringTie	exon	57985583	57986376	1000	-	.	gene_id "MSTRG.8649"; transcript_id "MSTRG.8649.4"; exon_number "1";
12	StringTie	exon	57987133	57987977	1000	-	.	gene_id "MSTRG.8649"; transcript_id "MSTRG.8649.4"; exon_number "2";
12	StringTie	exon	58011516	58011749	1000	-	.	gene_id "MSTRG.8649"; transcript_id "MSTRG.8649.4"; exon_number "3";
12	StringTie	exon	57986601	57987977	1000	-	.	gene_id "MSTRG.8649"; transcript_id "MSTRG.8649.5"; exon_number "1";
12	StringTie	exon	57994440	57994581	1000	-	.	gene_id "MSTRG.8649"; transcript_id "MSTRG.8649.5"; exon_number "2";
12	StringTie	exon	57999125	58000184	1000	-	.	gene_id "MSTRG.8649"; transcript_id "MSTRG.8649.5"; exon_number "3";
12	StringTie	exon	61316070	61316531	1000	+	.	gene_id "MSTRG.8734"; transcript_id "MSTRG.8734.2"; exon_number "1";
12	StringTie	exon	61317831	61318646	1000	+	.	gene_id "MSTRG.8734"; transcript_id "MSTRG.8734.2"; exon_number "2";
12	StringTie	exon	61318927	61319105	1000	+	.	gene_id "MSTRG.8734"; transcript_id "MSTRG.8734.2"; exon_number "3";
12	StringTie	exon	61316089	61316288	1000	+	.	gene_id "MSTRG.8734"; transcript_id "MSTRG.8734.3"; exon_number "1";
12	StringTie	exon	61317831	61318087	1000	+	.	gene_id "MSTRG.8734"; transcript_id "MSTRG.8734.3"; exon_number "2";
12	StringTie	exon	61318454	61319072	1000	+	.	gene_id "MSTRG.8734"; transcript_id "MSTRG.8734.3"; exon_number "3";
13	StringTie	exon	3180665	3180964	1000	-	.	gene_id "MSTRG.8762"; transcript_id "MSTRG.8762.1"; exon_number "1";
13	StringTie	exon	3201870	3201924	1000	-	.	gene_id "MSTRG.8762"; transcript_id "MSTRG.8762.1"; exon_number "2";
13	StringTie	exon	3202201	3202505	1000	-	.	gene_id "MSTRG.8762"; transcript_id "MSTRG.8762.1"; exon_number "3";
13	StringTie	exon	3257336	3257508	1000	-	.	gene_id "MSTRG.8832"; transcript_id "MSTRG.8832.1"; exon_number "1";
13	StringTie	exon	3258365	3258597	1000	-	.	gene_id "MSTRG.8832"; transcript_id "MSTRG.8832.1"; exon_number "2";
13	StringTie	exon	9844417	9844612	1000	+	.	gene_id "MSTRG.8903"; transcript_id "MSTRG.8903.1"; exon_number "1";
13	StringTie	exon	9851869	9851907	1000	+	.	gene_id "MSTRG.8903"; transcript_id "MSTRG.8903.1"; exon_number "2";
13	StringTie	exon	9905238	9905304	1000	+	.	gene_id "MSTRG.8903"; transcript_id "MSTRG.8903.1"; exon_number "3";
13	StringTie	exon	9906300	9906882	1000	+	.	gene_id "MSTRG.8903"; transcript_id "MSTRG.8903.1"; exon_number "4";
13	StringTie	exon	9844426	9844612	1000	+	.	gene_id "MSTRG.8903"; transcript_id "MSTRG.8903.2"; exon_number "1";
13	StringTie	exon	9851869	9851907	1000	+	.	gene_id "MSTRG.8903"; transcript_id "MSTRG.8903.2"; exon_number "2";
13	StringTie	exon	9884290	9884649	1000	+	.	gene_id "MSTRG.8903"; transcript_id "MSTRG.8903.2"; exon_number "3";
13	StringTie	exon	14086093	14086159	1000	+	.	gene_id "MSTRG.8964"; transcript_id "MSTRG.8964.1"; exon_number "1";
13	StringTie	exon	14091925	14092093	1000	+	.	gene_id "MSTRG.8964"; transcript_id "MSTRG.8964.1"; exon_number "2";
13	StringTie	exon	21614002	21614246	1000	-	.	gene_id "MSTRG.9133"; transcript_id "MSTRG.9133.1"; exon_number "1";
13	StringTie	exon	21670091	21670362	1000	-	.	gene_id "MSTRG.9133"; transcript_id "MSTRG.9133.1"; exon_number "2";
13	StringTie	exon	29707900	29708083	1000	-	.	gene_id "MSTRG.9345"; transcript_id "MSTRG.9345.1"; exon_number "1";
13	StringTie	exon	29715024	29715131	1000	-	.	gene_id "MSTRG.9345"; transcript_id "MSTRG.9345.1"; exon_number "2";
13	StringTie	exon	29720021	29720203	1000	-	.	gene_id "MSTRG.9345"; transcript_id "MSTRG.9345.1"; exon_number "3";
13	StringTie	exon	29707965	29708083	1000	-	.	gene_id "MSTRG.9345"; transcript_id "MSTRG.9345.2"; exon_number "1";
13	StringTie	exon	29714957	29715131	1000	-	.	gene_id "MSTRG.9345"; transcript_id "MSTRG.9345.2"; exon_number "2";
13	StringTie	exon	29720021	29720180	1000	-	.	gene_id "MSTRG.9345"; transcript_id "MSTRG.9345.2"; exon_number "3";
13	StringTie	exon	47588049	47588314	1000	+	.	gene_id "MSTRG.9844"; transcript_id "MSTRG.9844.1"; exon_number "1";
13	StringTie	exon	47637664	47637775	1000	+	.	gene_id "MSTRG.9844"; transcript_id "MSTRG.9844.1"; exon_number "2";
13	StringTie	exon	47741933	47743283	1000	+	.	gene_id "MSTRG.9844"; transcript_id "MSTRG.9844.1"; exon_number "3";
13	StringTie	exon	47588049	47588314	1000	+	.	gene_id "MSTRG.9844"; transcript_id "MSTRG.9844.2"; exon_number "1";
13	StringTie	exon	47637664	47637775	1000	+	.	gene_id "MSTRG.9844"; transcript_id "MSTRG.9844.2"; exon_number "2";
13	StringTie	exon	47679189	47679391	1000	+	.	gene_id "MSTRG.9844"; transcript_id "MSTRG.9844.2"; exon_number "3";
13	StringTie	exon	47741933	47743283	1000	+	.	gene_id "MSTRG.9844"; transcript_id "MSTRG.9844.2"; exon_number "4";
13	StringTie	exon	47588083	47588314	1000	+	.	gene_id "MSTRG.9844"; transcript_id "MSTRG.9844.3"; exon_number "1";
13	StringTie	exon	47637664	47637775	1000	+	.	gene_id "MSTRG.9844"; transcript_id "MSTRG.9844.3"; exon_number "2";
13	StringTie	exon	47720298	47720353	1000	+	.	gene_id "MSTRG.9844"; transcript_id "MSTRG.9844.3"; exon_number "3";
13	StringTie	exon	47741933	47742562	1000	+	.	gene_id "MSTRG.9844"; transcript_id "MSTRG.9844.3"; exon_number "4";
13	StringTie	exon	70911989	70912239	1000	+	.	gene_id "MSTRG.10125"; transcript_id "MSTRG.10125.1"; exon_number "1";
13	StringTie	exon	70912484	70912504	1000	+	.	gene_id "MSTRG.10125"; transcript_id "MSTRG.10125.1"; exon_number "2";
13	StringTie	exon	75843252	75843540	1000	+	.	gene_id "MSTRG.10246"; transcript_id "MSTRG.10246.1"; exon_number "1";
13	StringTie	exon	75843672	75843760	1000	+	.	gene_id "MSTRG.10246"; transcript_id "MSTRG.10246.1"; exon_number "2";
13	StringTie	exon	75844773	75845045	1000	+	.	gene_id "MSTRG.10246"; transcript_id "MSTRG.10246.1"; exon_number "3";
13	StringTie	exon	86302749	86303080	1000	-	.	gene_id "MSTRG.10382"; transcript_id "MSTRG.10382.1"; exon_number "1";
13	StringTie	exon	86328136	86328187	1000	-	.	gene_id "MSTRG.10382"; transcript_id "MSTRG.10382.1"; exon_number "2";
13	StringTie	exon	86260706	86261009	1000	-	.	gene_id "MSTRG.10385"; transcript_id "MSTRG.10385.1"; exon_number "1";
13	StringTie	exon	86275793	86275819	1000	-	.	gene_id "MSTRG.10385"; transcript_id "MSTRG.10385.1"; exon_number "2";
13	StringTie	exon	87396286	87396340	1000	-	.	gene_id "MSTRG.10417"; transcript_id "MSTRG.10417.1"; exon_number "1";
13	StringTie	exon	87398149	87398443	1000	-	.	gene_id "MSTRG.10417"; transcript_id "MSTRG.10417.1"; exon_number "2";
13	StringTie	exon	87407489	87407520	1000	-	.	gene_id "MSTRG.10417"; transcript_id "MSTRG.10417.1"; exon_number "3";
13	StringTie	exon	88487749	88487926	1000	-	.	gene_id "MSTRG.10426"; transcript_id "MSTRG.10426.1"; exon_number "1";
13	StringTie	exon	88642514	88642606	1000	-	.	gene_id "MSTRG.10426"; transcript_id "MSTRG.10426.1"; exon_number "2";
13	StringTie	exon	88746884	88746963	1000	-	.	gene_id "MSTRG.10426"; transcript_id "MSTRG.10426.1"; exon_number "3";
13	StringTie	exon	88850326	88850394	1000	-	.	gene_id "MSTRG.10426"; transcript_id "MSTRG.10426.1"; exon_number "4";
13	StringTie	exon	88877229	88877289	1000	-	.	gene_id "MSTRG.10426"; transcript_id "MSTRG.10426.1"; exon_number "5";
13	StringTie	exon	90244605	90244841	1000	-	.	gene_id "MSTRG.10444"; transcript_id "MSTRG.10444.1"; exon_number "1";
13	StringTie	exon	90248167	90248267	1000	-	.	gene_id "MSTRG.10444"; transcript_id "MSTRG.10444.1"; exon_number "2";
13	StringTie	exon	90249310	90249386	1000	-	.	gene_id "MSTRG.10444"; transcript_id "MSTRG.10444.1"; exon_number "3";
13	StringTie	exon	90251207	90251324	1000	-	.	gene_id "MSTRG.10444"; transcript_id "MSTRG.10444.1"; exon_number "4";
13	StringTie	exon	90273284	90273398	1000	-	.	gene_id "MSTRG.10444"; transcript_id "MSTRG.10444.1"; exon_number "5";
13	StringTie	exon	90244749	90244841	1000	-	.	gene_id "MSTRG.10444"; transcript_id "MSTRG.10444.2"; exon_number "1";
13	StringTie	exon	90248167	90248267	1000	-	.	gene_id "MSTRG.10444"; transcript_id "MSTRG.10444.2"; exon_number "2";
13	StringTie	exon	90249310	90249386	1000	-	.	gene_id "MSTRG.10444"; transcript_id "MSTRG.10444.2"; exon_number "3";
13	StringTie	exon	90251207	90251324	1000	-	.	gene_id "MSTRG.10444"; transcript_id "MSTRG.10444.2"; exon_number "4";
13	StringTie	exon	90257058	90257215	1000	-	.	gene_id "MSTRG.10444"; transcript_id "MSTRG.10444.2"; exon_number "5";
13	StringTie	exon	93051930	93052078	1000	+	.	gene_id "MSTRG.10519"; transcript_id "MSTRG.10519.1"; exon_number "1";
13	StringTie	exon	93052418	93052668	1000	+	.	gene_id "MSTRG.10519"; transcript_id "MSTRG.10519.1"; exon_number "2";
13	StringTie	exon	93053068	93053666	1000	+	.	gene_id "MSTRG.10519"; transcript_id "MSTRG.10519.1"; exon_number "3";
13	StringTie	exon	93052001	93052078	1000	+	.	gene_id "MSTRG.10519"; transcript_id "MSTRG.10519.2"; exon_number "1";
13	StringTie	exon	93052418	93052476	1000	+	.	gene_id "MSTRG.10519"; transcript_id "MSTRG.10519.2"; exon_number "2";
13	StringTie	exon	93053068	93053666	1000	+	.	gene_id "MSTRG.10519"; transcript_id "MSTRG.10519.2"; exon_number "3";
13	StringTie	exon	96974412	96974918	1000	+	.	gene_id "MSTRG.10596"; transcript_id "MSTRG.10596.2"; exon_number "1";
13	StringTie	exon	96977657	96977854	1000	+	.	gene_id "MSTRG.10596"; transcript_id "MSTRG.10596.2"; exon_number "2";
13	StringTie	exon	96978697	96978776	1000	+	.	gene_id "MSTRG.10596"; transcript_id "MSTRG.10596.2"; exon_number "3";
13	StringTie	exon	96979208	96979374	1000	+	.	gene_id "MSTRG.10596"; transcript_id "MSTRG.10596.2"; exon_number "4";
13	StringTie	exon	96980934	96985679	1000	+	.	gene_id "MSTRG.10596"; transcript_id "MSTRG.10596.2"; exon_number "5";
13	StringTie	exon	96985824	96986261	1000	+	.	gene_id "MSTRG.10596"; transcript_id "MSTRG.10596.2"; exon_number "6";
13	StringTie	exon	100438965	100440078	1000	-	.	gene_id "MSTRG.10613"; transcript_id "MSTRG.10613.1"; exon_number "1";
13	StringTie	exon	100441686	100442045	1000	-	.	gene_id "MSTRG.10613"; transcript_id "MSTRG.10613.1"; exon_number "2";
13	StringTie	exon	109632409	109632466	1000	+	.	gene_id "MSTRG.10672"; transcript_id "MSTRG.10672.1"; exon_number "1";
13	StringTie	exon	109638400	109638598	1000	+	.	gene_id "MSTRG.10672"; transcript_id "MSTRG.10672.1"; exon_number "2";
13	StringTie	exon	110052794	110053089	1000	+	.	gene_id "MSTRG.10677"; transcript_id "MSTRG.10677.1"; exon_number "1";
13	StringTie	exon	110054195	110054278	1000	+	.	gene_id "MSTRG.10677"; transcript_id "MSTRG.10677.1"; exon_number "2";
13	StringTie	exon	117057056	117057133	1000	-	.	gene_id "MSTRG.10765"; transcript_id "MSTRG.10765.1"; exon_number "1";
13	StringTie	exon	117094882	117095070	1000	-	.	gene_id "MSTRG.10765"; transcript_id "MSTRG.10765.1"; exon_number "2";
13	StringTie	exon	125682833	125683038	1000	-	.	gene_id "MSTRG.11025"; transcript_id "MSTRG.11025.1"; exon_number "1";
13	StringTie	exon	125692572	125692677	1000	-	.	gene_id "MSTRG.11025"; transcript_id "MSTRG.11025.1"; exon_number "2";
13	StringTie	exon	126904865	126904935	1000	-	.	gene_id "MSTRG.11029"; transcript_id "MSTRG.11029.1"; exon_number "1";
13	StringTie	exon	126914759	126914885	1000	-	.	gene_id "MSTRG.11029"; transcript_id "MSTRG.11029.1"; exon_number "2";
13	StringTie	exon	126943277	126943353	1000	-	.	gene_id "MSTRG.11029"; transcript_id "MSTRG.11029.1"; exon_number "3";
13	StringTie	exon	151528552	151528737	1000	+	.	gene_id "MSTRG.11563"; transcript_id "MSTRG.11563.1"; exon_number "1";
13	StringTie	exon	151536657	151537050	1000	+	.	gene_id "MSTRG.11563"; transcript_id "MSTRG.11563.1"; exon_number "2";
13	StringTie	exon	151545374	151545428	1000	+	.	gene_id "MSTRG.11564"; transcript_id "MSTRG.11564.1"; exon_number "1";
13	StringTie	exon	151545755	151545968	1000	+	.	gene_id "MSTRG.11564"; transcript_id "MSTRG.11564.1"; exon_number "2";
13	StringTie	exon	151420180	151420264	1000	-	.	gene_id "MSTRG.11575"; transcript_id "MSTRG.11575.1"; exon_number "1";
13	StringTie	exon	151420574	151420757	1000	-	.	gene_id "MSTRG.11575"; transcript_id "MSTRG.11575.1"; exon_number "2";
13	StringTie	exon	171804863	171804956	1000	+	.	gene_id "MSTRG.11794"; transcript_id "MSTRG.11794.1"; exon_number "1";
13	StringTie	exon	171863925	171863970	1000	+	.	gene_id "MSTRG.11794"; transcript_id "MSTRG.11794.1"; exon_number "2";
13	StringTie	exon	171960353	171960433	1000	+	.	gene_id "MSTRG.11794"; transcript_id "MSTRG.11794.1"; exon_number "3";
13	StringTie	exon	171981984	171982139	1000	+	.	gene_id "MSTRG.11794"; transcript_id "MSTRG.11794.1"; exon_number "4";
13	StringTie	exon	171992346	171992597	1000	+	.	gene_id "MSTRG.11794"; transcript_id "MSTRG.11794.1"; exon_number "5";
13	StringTie	exon	171993725	171993784	1000	+	.	gene_id "MSTRG.11794"; transcript_id "MSTRG.11794.1"; exon_number "6";
13	StringTie	exon	171995157	171995214	1000	+	.	gene_id "MSTRG.11794"; transcript_id "MSTRG.11794.1"; exon_number "7";
13	StringTie	exon	172006549	172006639	1000	+	.	gene_id "MSTRG.11794"; transcript_id "MSTRG.11794.1"; exon_number "8";
13	StringTie	exon	172011244	172012811	1000	+	.	gene_id "MSTRG.11794"; transcript_id "MSTRG.11794.1"; exon_number "9";
13	StringTie	exon	180289950	180289991	1000	+	.	gene_id "MSTRG.11838"; transcript_id "MSTRG.11838.1"; exon_number "1";
13	StringTie	exon	180317684	180317759	1000	+	.	gene_id "MSTRG.11838"; transcript_id "MSTRG.11838.1"; exon_number "2";
13	StringTie	exon	180323035	180323087	1000	+	.	gene_id "MSTRG.11838"; transcript_id "MSTRG.11838.1"; exon_number "3";
13	StringTie	exon	180411486	180411533	1000	+	.	gene_id "MSTRG.11838"; transcript_id "MSTRG.11838.1"; exon_number "4";
13	StringTie	exon	180413149	180413434	1000	+	.	gene_id "MSTRG.11838"; transcript_id "MSTRG.11838.1"; exon_number "5";
13	StringTie	exon	180289950	180289991	1000	+	.	gene_id "MSTRG.11838"; transcript_id "MSTRG.11838.2"; exon_number "1";
13	StringTie	exon	180317684	180317759	1000	+	.	gene_id "MSTRG.11838"; transcript_id "MSTRG.11838.2"; exon_number "2";
13	StringTie	exon	180323035	180323087	1000	+	.	gene_id "MSTRG.11838"; transcript_id "MSTRG.11838.2"; exon_number "3";
13	StringTie	exon	180421298	180421474	1000	+	.	gene_id "MSTRG.11838"; transcript_id "MSTRG.11838.2"; exon_number "4";
13	StringTie	exon	180206895	180208616	1000	-	.	gene_id "MSTRG.11840"; transcript_id "MSTRG.11840.1"; exon_number "1";
13	StringTie	exon	180209737	180209882	1000	-	.	gene_id "MSTRG.11840"; transcript_id "MSTRG.11840.1"; exon_number "2";
13	StringTie	exon	181189151	181190113	1000	+	.	gene_id "MSTRG.11907"; transcript_id "MSTRG.11907.1"; exon_number "1";
13	StringTie	exon	181246799	181246863	1000	+	.	gene_id "MSTRG.11907"; transcript_id "MSTRG.11907.1"; exon_number "2";
13	StringTie	exon	189094684	189094963	1000	-	.	gene_id "MSTRG.11956"; transcript_id "MSTRG.11956.1"; exon_number "1";
13	StringTie	exon	189095412	189095552	1000	-	.	gene_id "MSTRG.11956"; transcript_id "MSTRG.11956.1"; exon_number "2";
13	StringTie	exon	188996634	188996893	1000	-	.	gene_id "MSTRG.11957"; transcript_id "MSTRG.11957.1"; exon_number "1";
13	StringTie	exon	189053362	189053454	1000	-	.	gene_id "MSTRG.11957"; transcript_id "MSTRG.11957.1"; exon_number "2";
13	StringTie	exon	189059496	189059714	1000	-	.	gene_id "MSTRG.11957"; transcript_id "MSTRG.11957.1"; exon_number "3";
13	StringTie	exon	189034519	189034949	1000	-	.	gene_id "MSTRG.11957"; transcript_id "MSTRG.11957.2"; exon_number "1";
13	StringTie	exon	189053362	189053454	1000	-	.	gene_id "MSTRG.11957"; transcript_id "MSTRG.11957.2"; exon_number "2";
13	StringTie	exon	189059496	189059714	1000	-	.	gene_id "MSTRG.11957"; transcript_id "MSTRG.11957.2"; exon_number "3";
13	StringTie	exon	189052189	189052391	1000	-	.	gene_id "MSTRG.11957"; transcript_id "MSTRG.11957.3"; exon_number "1";
13	StringTie	exon	189053362	189053454	1000	-	.	gene_id "MSTRG.11957"; transcript_id "MSTRG.11957.3"; exon_number "2";
13	StringTie	exon	189059496	189059717	1000	-	.	gene_id "MSTRG.11957"; transcript_id "MSTRG.11957.3"; exon_number "3";
13	StringTie	exon	191458493	191458682	1000	+	.	gene_id "MSTRG.11979"; transcript_id "MSTRG.11979.1"; exon_number "1";
13	StringTie	exon	191461072	191461226	1000	+	.	gene_id "MSTRG.11979"; transcript_id "MSTRG.11979.1"; exon_number "2";
13	StringTie	exon	191464970	191465286	1000	+	.	gene_id "MSTRG.11979"; transcript_id "MSTRG.11979.1"; exon_number "3";
13	StringTie	exon	192149142	192149680	1000	+	.	gene_id "MSTRG.11992"; transcript_id "MSTRG.11992.1"; exon_number "1";
13	StringTie	exon	192151792	192152201	1000	+	.	gene_id "MSTRG.11992"; transcript_id "MSTRG.11992.1"; exon_number "2";
13	StringTie	exon	195290162	195291321	1000	-	.	gene_id "MSTRG.12018"; transcript_id "MSTRG.12018.1"; exon_number "1";
13	StringTie	exon	195300700	195300809	1000	-	.	gene_id "MSTRG.12018"; transcript_id "MSTRG.12018.1"; exon_number "2";
13	StringTie	exon	195326264	195326403	1000	-	.	gene_id "MSTRG.12018"; transcript_id "MSTRG.12018.1"; exon_number "3";
13	StringTie	exon	199317692	199317764	1000	+	.	gene_id "MSTRG.12063"; transcript_id "MSTRG.12063.1"; exon_number "1";
13	StringTie	exon	199318679	199319528	1000	+	.	gene_id "MSTRG.12063"; transcript_id "MSTRG.12063.1"; exon_number "2";
13	StringTie	exon	204596859	204597227	1000	-	.	gene_id "MSTRG.12154"; transcript_id "MSTRG.12154.1"; exon_number "1";
13	StringTie	exon	204597657	204597814	1000	-	.	gene_id "MSTRG.12154"; transcript_id "MSTRG.12154.1"; exon_number "2";
13	StringTie	exon	205702473	205702696	1000	-	.	gene_id "MSTRG.12187"; transcript_id "MSTRG.12187.1"; exon_number "1";
13	StringTie	exon	205705917	205705953	1000	-	.	gene_id "MSTRG.12187"; transcript_id "MSTRG.12187.1"; exon_number "2";
14	StringTie	exon	867519	867673	1000	+	.	gene_id "MSTRG.12266"; transcript_id "MSTRG.12266.1"; exon_number "1";
14	StringTie	exon	873905	875364	1000	+	.	gene_id "MSTRG.12266"; transcript_id "MSTRG.12266.1"; exon_number "2";
14	StringTie	exon	7632533	7632720	1000	-	.	gene_id "MSTRG.12369"; transcript_id "MSTRG.12369.1"; exon_number "1";
14	StringTie	exon	7643050	7643114	1000	-	.	gene_id "MSTRG.12369"; transcript_id "MSTRG.12369.1"; exon_number "2";
14	StringTie	exon	7644849	7644896	1000	-	.	gene_id "MSTRG.12369"; transcript_id "MSTRG.12369.1"; exon_number "3";
14	StringTie	exon	7632542	7632720	1000	-	.	gene_id "MSTRG.12369"; transcript_id "MSTRG.12369.2"; exon_number "1";
14	StringTie	exon	7643050	7643114	1000	-	.	gene_id "MSTRG.12369"; transcript_id "MSTRG.12369.2"; exon_number "2";
14	StringTie	exon	7651212	7651239	1000	-	.	gene_id "MSTRG.12369"; transcript_id "MSTRG.12369.2"; exon_number "3";
14	StringTie	exon	13325499	13325758	1000	-	.	gene_id "MSTRG.12464"; transcript_id "MSTRG.12464.1"; exon_number "1";
14	StringTie	exon	13327218	13327494	1000	-	.	gene_id "MSTRG.12464"; transcript_id "MSTRG.12464.1"; exon_number "2";
14	StringTie	exon	19945932	19946659	1000	-	.	gene_id "MSTRG.12632"; transcript_id "MSTRG.12632.1"; exon_number "1";
14	StringTie	exon	19955624	19956221	1000	-	.	gene_id "MSTRG.12632"; transcript_id "MSTRG.12632.1"; exon_number "2";
14	StringTie	exon	19957137	19957393	1000	-	.	gene_id "MSTRG.12632"; transcript_id "MSTRG.12632.1"; exon_number "3";
14	StringTie	exon	28266867	28266919	1000	+	.	gene_id "MSTRG.12737"; transcript_id "MSTRG.12737.1"; exon_number "1";
14	StringTie	exon	28267305	28268499	1000	+	.	gene_id "MSTRG.12737"; transcript_id "MSTRG.12737.1"; exon_number "2";
14	StringTie	exon	28266977	28267818	1000	+	.	gene_id "MSTRG.12737"; transcript_id "MSTRG.12737.2"; exon_number "1";
14	StringTie	exon	28268353	28268489	1000	+	.	gene_id "MSTRG.12737"; transcript_id "MSTRG.12737.2"; exon_number "2";
14	StringTie	exon	28823523	28824445	1000	+	.	gene_id "MSTRG.12743"; transcript_id "MSTRG.12743.1"; exon_number "1";
14	StringTie	exon	28824475	28824827	1000	+	.	gene_id "MSTRG.12743"; transcript_id "MSTRG.12743.1"; exon_number "2";
14	StringTie	exon	56257398	56257676	1000	+	.	gene_id "MSTRG.13524"; transcript_id "MSTRG.13524.1"; exon_number "1";
14	StringTie	exon	56266194	56268022	1000	+	.	gene_id "MSTRG.13524"; transcript_id "MSTRG.13524.1"; exon_number "2";
14	StringTie	exon	56604929	56605142	1000	+	.	gene_id "MSTRG.13534"; transcript_id "MSTRG.13534.1"; exon_number "1";
14	StringTie	exon	56607677	56607867	1000	+	.	gene_id "MSTRG.13534"; transcript_id "MSTRG.13534.1"; exon_number "2";
14	StringTie	exon	61085642	61086824	1000	-	.	gene_id "MSTRG.13672"; transcript_id "MSTRG.13672.1"; exon_number "1";
14	StringTie	exon	61087250	61087392	1000	-	.	gene_id "MSTRG.13672"; transcript_id "MSTRG.13672.1"; exon_number "2";
14	StringTie	exon	67079595	67079645	1000	+	.	gene_id "MSTRG.13769"; transcript_id "MSTRG.13769.1"; exon_number "1";
14	StringTie	exon	67092628	67092777	1000	+	.	gene_id "MSTRG.13769"; transcript_id "MSTRG.13769.1"; exon_number "2";
14	StringTie	exon	67113687	67113766	1000	+	.	gene_id "MSTRG.13769"; transcript_id "MSTRG.13769.1"; exon_number "3";
14	StringTie	exon	77935605	77935714	1000	-	.	gene_id "MSTRG.13983"; transcript_id "MSTRG.13983.1"; exon_number "1";
14	StringTie	exon	77936041	77936263	1000	-	.	gene_id "MSTRG.13983"; transcript_id "MSTRG.13983.1"; exon_number "2";
14	StringTie	exon	88396371	88397393	1000	-	.	gene_id "MSTRG.14116"; transcript_id "MSTRG.14116.1"; exon_number "1";
14	StringTie	exon	88399334	88399358	1000	-	.	gene_id "MSTRG.14116"; transcript_id "MSTRG.14116.1"; exon_number "2";
14	StringTie	exon	89889642	89889837	1000	-	.	gene_id "MSTRG.14141"; transcript_id "MSTRG.14141.1"; exon_number "1";
14	StringTie	exon	89891911	89892028	1000	-	.	gene_id "MSTRG.14141"; transcript_id "MSTRG.14141.1"; exon_number "2";
14	StringTie	exon	89890254	89890378	1000	+	.	gene_id "MSTRG.14142"; transcript_id "MSTRG.14142.1"; exon_number "1";
14	StringTie	exon	89909816	89909927	1000	+	.	gene_id "MSTRG.14142"; transcript_id "MSTRG.14142.1"; exon_number "2";
14	StringTie	exon	89891939	89892681	1000	+	.	gene_id "MSTRG.14142"; transcript_id "MSTRG.14142.2"; exon_number "1";
14	StringTie	exon	89909816	89909927	1000	+	.	gene_id "MSTRG.14142"; transcript_id "MSTRG.14142.2"; exon_number "2";
14	StringTie	exon	99310827	99311042	1000	+	.	gene_id "MSTRG.14322"; transcript_id "MSTRG.14322.1"; exon_number "1";
14	StringTie	exon	99311065	99311099	1000	+	.	gene_id "MSTRG.14322"; transcript_id "MSTRG.14322.1"; exon_number "2";
14	StringTie	exon	120437562	120438012	1000	-	.	gene_id "MSTRG.14730"; transcript_id "MSTRG.14730.1"; exon_number "1";
14	StringTie	exon	120438116	120438260	1000	-	.	gene_id "MSTRG.14730"; transcript_id "MSTRG.14730.1"; exon_number "2";
14	StringTie	exon	120439869	120440273	1000	-	.	gene_id "MSTRG.14730"; transcript_id "MSTRG.14730.1"; exon_number "3";
14	StringTie	exon	120747961	120748110	1000	+	.	gene_id "MSTRG.14736"; transcript_id "MSTRG.14736.1"; exon_number "1";
14	StringTie	exon	120750002	120750263	1000	+	.	gene_id "MSTRG.14736"; transcript_id "MSTRG.14736.1"; exon_number "2";
14	StringTie	exon	124521325	124521609	1000	+	.	gene_id "MSTRG.14789"; transcript_id "MSTRG.14789.1"; exon_number "1";
14	StringTie	exon	124522515	124522677	1000	+	.	gene_id "MSTRG.14789"; transcript_id "MSTRG.14789.1"; exon_number "2";
14	StringTie	exon	133665633	133665844	1000	+	.	gene_id "MSTRG.14901"; transcript_id "MSTRG.14901.1"; exon_number "1";
14	StringTie	exon	133672733	133672815	1000	+	.	gene_id "MSTRG.14901"; transcript_id "MSTRG.14901.1"; exon_number "2";
14	StringTie	exon	133677991	133678031	1000	+	.	gene_id "MSTRG.14901"; transcript_id "MSTRG.14901.1"; exon_number "3";
14	StringTie	exon	133665662	133665844	1000	+	.	gene_id "MSTRG.14901"; transcript_id "MSTRG.14901.2"; exon_number "1";
14	StringTie	exon	133672733	133672815	1000	+	.	gene_id "MSTRG.14901"; transcript_id "MSTRG.14901.2"; exon_number "2";
14	StringTie	exon	133677961	133678806	1000	+	.	gene_id "MSTRG.14901"; transcript_id "MSTRG.14901.2"; exon_number "3";
14	StringTie	exon	135090876	135091389	1000	+	.	gene_id "MSTRG.14920"; transcript_id "MSTRG.14920.1"; exon_number "1";
14	StringTie	exon	135093313	135093917	1000	+	.	gene_id "MSTRG.14920"; transcript_id "MSTRG.14920.1"; exon_number "2";
14	StringTie	exon	135094311	135094380	1000	+	.	gene_id "MSTRG.14920"; transcript_id "MSTRG.14920.1"; exon_number "3";
14	StringTie	exon	135094630	135094993	1000	+	.	gene_id "MSTRG.14920"; transcript_id "MSTRG.14920.1"; exon_number "4";
14	StringTie	exon	135095073	135095450	1000	+	.	gene_id "MSTRG.14921"; transcript_id "MSTRG.14921.1"; exon_number "1";
14	StringTie	exon	135096003	135096851	1000	+	.	gene_id "MSTRG.14921"; transcript_id "MSTRG.14921.1"; exon_number "2";
14	StringTie	exon	140372110	140372157	1000	+	.	gene_id "MSTRG.14967"; transcript_id "MSTRG.14967.1"; exon_number "1";
14	StringTie	exon	140373076	140373787	1000	+	.	gene_id "MSTRG.14967"; transcript_id "MSTRG.14967.1"; exon_number "2";
15	StringTie	exon	20042252	20042331	1000	-	.	gene_id "MSTRG.15343"; transcript_id "MSTRG.15343.1"; exon_number "1";
15	StringTie	exon	20043603	20043795	1000	-	.	gene_id "MSTRG.15343"; transcript_id "MSTRG.15343.1"; exon_number "2";
15	StringTie	exon	20102905	20103171	1000	-	.	gene_id "MSTRG.15351"; transcript_id "MSTRG.15351.1"; exon_number "1";
15	StringTie	exon	20104262	20104327	1000	-	.	gene_id "MSTRG.15351"; transcript_id "MSTRG.15351.1"; exon_number "2";
15	StringTie	exon	25084763	25085006	1000	-	.	gene_id "MSTRG.15391"; transcript_id "MSTRG.15391.1"; exon_number "1";
15	StringTie	exon	25086136	25086225	1000	-	.	gene_id "MSTRG.15391"; transcript_id "MSTRG.15391.1"; exon_number "2";
15	StringTie	exon	25318455	25318559	1000	-	.	gene_id "MSTRG.15398"; transcript_id "MSTRG.15398.1"; exon_number "1";
15	StringTie	exon	25319571	25319696	1000	-	.	gene_id "MSTRG.15398"; transcript_id "MSTRG.15398.1"; exon_number "2";
15	StringTie	exon	25323581	25323751	1000	-	.	gene_id "MSTRG.15398"; transcript_id "MSTRG.15398.1"; exon_number "3";
15	StringTie	exon	33268920	33269141	1000	-	.	gene_id "MSTRG.15480"; transcript_id "MSTRG.15480.1"; exon_number "1";
15	StringTie	exon	33269566	33269791	1000	-	.	gene_id "MSTRG.15480"; transcript_id "MSTRG.15480.1"; exon_number "2";
15	StringTie	exon	33477208	33480355	1000	-	.	gene_id "MSTRG.15493"; transcript_id "MSTRG.15493.1"; exon_number "1";
15	StringTie	exon	33480980	33481466	1000	-	.	gene_id "MSTRG.15493"; transcript_id "MSTRG.15493.1"; exon_number "2";
15	StringTie	exon	44899136	44901404	1000	-	.	gene_id "MSTRG.15588"; transcript_id "MSTRG.15588.1"; exon_number "1";
15	StringTie	exon	44908934	44909093	1000	-	.	gene_id "MSTRG.15588"; transcript_id "MSTRG.15588.1"; exon_number "2";
15	StringTie	exon	44917481	44917518	1000	-	.	gene_id "MSTRG.15588"; transcript_id "MSTRG.15588.1"; exon_number "3";
15	StringTie	exon	46950380	46950564	1000	-	.	gene_id "MSTRG.15652"; transcript_id "MSTRG.15652.1"; exon_number "1";
15	StringTie	exon	46954227	46954302	1000	-	.	gene_id "MSTRG.15652"; transcript_id "MSTRG.15652.1"; exon_number "2";
15	StringTie	exon	70676046	70676465	1000	-	.	gene_id "MSTRG.16016"; transcript_id "MSTRG.16016.1"; exon_number "1";
15	StringTie	exon	70687576	70687616	1000	-	.	gene_id "MSTRG.16016"; transcript_id "MSTRG.16016.1"; exon_number "2";
15	StringTie	exon	71247812	71247891	1000	+	.	gene_id "MSTRG.16029"; transcript_id "MSTRG.16029.1"; exon_number "1";
15	StringTie	exon	71259536	71259795	1000	+	.	gene_id "MSTRG.16029"; transcript_id "MSTRG.16029.1"; exon_number "2";
15	StringTie	exon	71259558	71259782	1000	-	.	gene_id "MSTRG.16030"; transcript_id "MSTRG.16030.1"; exon_number "1";
15	StringTie	exon	71262488	71262539	1000	-	.	gene_id "MSTRG.16030"; transcript_id "MSTRG.16030.1"; exon_number "2";
15	StringTie	exon	81567760	81568020	1000	+	.	gene_id "MSTRG.16189"; transcript_id "MSTRG.16189.1"; exon_number "1";
15	StringTie	exon	81577448	81577525	1000	+	.	gene_id "MSTRG.16189"; transcript_id "MSTRG.16189.1"; exon_number "2";
15	StringTie	exon	81935886	81936330	1000	-	.	gene_id "MSTRG.16201"; transcript_id "MSTRG.16201.1"; exon_number "1";
15	StringTie	exon	81938009	81938132	1000	-	.	gene_id "MSTRG.16201"; transcript_id "MSTRG.16201.1"; exon_number "2";
15	StringTie	exon	81976411	81977168	1000	-	.	gene_id "MSTRG.16206"; transcript_id "MSTRG.16206.1"; exon_number "1";
15	StringTie	exon	81987597	81987668	1000	-	.	gene_id "MSTRG.16206"; transcript_id "MSTRG.16206.1"; exon_number "2";
15	StringTie	exon	88582087	88582284	1000	-	.	gene_id "MSTRG.16341"; transcript_id "MSTRG.16341.1"; exon_number "1";
15	StringTie	exon	88587423	88587637	1000	-	.	gene_id "MSTRG.16341"; transcript_id "MSTRG.16341.1"; exon_number "2";
15	StringTie	exon	93322731	93322972	1000	-	.	gene_id "MSTRG.16369"; transcript_id "MSTRG.16369.1"; exon_number "1";
15	StringTie	exon	93326852	93326972	1000	-	.	gene_id "MSTRG.16369"; transcript_id "MSTRG.16369.1"; exon_number "2";
15	StringTie	exon	93334932	93335003	1000	-	.	gene_id "MSTRG.16369"; transcript_id "MSTRG.16369.1"; exon_number "3";
15	StringTie	exon	93341321	93341420	1000	-	.	gene_id "MSTRG.16369"; transcript_id "MSTRG.16369.1"; exon_number "4";
15	StringTie	exon	93322731	93322972	1000	-	.	gene_id "MSTRG.16369"; transcript_id "MSTRG.16369.2"; exon_number "1";
15	StringTie	exon	93326852	93326972	1000	-	.	gene_id "MSTRG.16369"; transcript_id "MSTRG.16369.2"; exon_number "2";
15	StringTie	exon	93334009	93334155	1000	-	.	gene_id "MSTRG.16369"; transcript_id "MSTRG.16369.2"; exon_number "3";
15	StringTie	exon	93334932	93335003	1000	-	.	gene_id "MSTRG.16369"; transcript_id "MSTRG.16369.2"; exon_number "4";
15	StringTie	exon	93341321	93341420	1000	-	.	gene_id "MSTRG.16369"; transcript_id "MSTRG.16369.2"; exon_number "5";
15	StringTie	exon	93322731	93322972	1000	-	.	gene_id "MSTRG.16369"; transcript_id "MSTRG.16369.3"; exon_number "1";
15	StringTie	exon	93326852	93326972	1000	-	.	gene_id "MSTRG.16369"; transcript_id "MSTRG.16369.3"; exon_number "2";
15	StringTie	exon	93327421	93327487	1000	-	.	gene_id "MSTRG.16369"; transcript_id "MSTRG.16369.3"; exon_number "3";
15	StringTie	exon	93334932	93335003	1000	-	.	gene_id "MSTRG.16369"; transcript_id "MSTRG.16369.3"; exon_number "4";
15	StringTie	exon	93340479	93340604	1000	-	.	gene_id "MSTRG.16369"; transcript_id "MSTRG.16369.3"; exon_number "5";
15	StringTie	exon	93341321	93341420	1000	-	.	gene_id "MSTRG.16369"; transcript_id "MSTRG.16369.3"; exon_number "6";
15	StringTie	exon	96328077	96328979	1000	+	.	gene_id "MSTRG.16449"; transcript_id "MSTRG.16449.1"; exon_number "1";
15	StringTie	exon	96332498	96332651	1000	+	.	gene_id "MSTRG.16449"; transcript_id "MSTRG.16449.1"; exon_number "2";
15	StringTie	exon	96277459	96278763	1000	-	.	gene_id "MSTRG.16452"; transcript_id "MSTRG.16452.1"; exon_number "1";
15	StringTie	exon	96312086	96312182	1000	-	.	gene_id "MSTRG.16452"; transcript_id "MSTRG.16452.1"; exon_number "2";
15	StringTie	exon	96313389	96313543	1000	-	.	gene_id "MSTRG.16452"; transcript_id "MSTRG.16452.1"; exon_number "3";
15	StringTie	exon	101616900	101616951	1000	+	.	gene_id "MSTRG.16510"; transcript_id "MSTRG.16510.1"; exon_number "1";
15	StringTie	exon	101618374	101618467	1000	+	.	gene_id "MSTRG.16510"; transcript_id "MSTRG.16510.1"; exon_number "2";
15	StringTie	exon	101623287	101623509	1000	+	.	gene_id "MSTRG.16510"; transcript_id "MSTRG.16510.1"; exon_number "3";
15	StringTie	exon	103540924	103540993	1000	-	.	gene_id "MSTRG.16542"; transcript_id "MSTRG.16542.1"; exon_number "1";
15	StringTie	exon	103542565	103542722	1000	-	.	gene_id "MSTRG.16542"; transcript_id "MSTRG.16542.1"; exon_number "2";
15	StringTie	exon	110849049	110849264	1000	-	.	gene_id "MSTRG.16755"; transcript_id "MSTRG.16755.1"; exon_number "1";
15	StringTie	exon	110858751	110859012	1000	-	.	gene_id "MSTRG.16755"; transcript_id "MSTRG.16755.1"; exon_number "2";
15	StringTie	exon	131459634	131460085	1000	-	.	gene_id "MSTRG.17119"; transcript_id "MSTRG.17119.1"; exon_number "1";
15	StringTie	exon	131462371	131462584	1000	-	.	gene_id "MSTRG.17119"; transcript_id "MSTRG.17119.1"; exon_number "2";
15	StringTie	exon	132279733	132280376	1000	-	.	gene_id "MSTRG.17153"; transcript_id "MSTRG.17153.1"; exon_number "1";
15	StringTie	exon	132281431	132281813	1000	-	.	gene_id "MSTRG.17153"; transcript_id "MSTRG.17153.1"; exon_number "2";
15	StringTie	exon	140166028	140166181	1000	-	.	gene_id "MSTRG.17304"; transcript_id "MSTRG.17304.2"; exon_number "1";
15	StringTie	exon	140170601	140170679	1000	-	.	gene_id "MSTRG.17304"; transcript_id "MSTRG.17304.2"; exon_number "2";
15	StringTie	exon	140170780	140170931	1000	-	.	gene_id "MSTRG.17304"; transcript_id "MSTRG.17304.2"; exon_number "3";
15	StringTie	exon	140171065	140171116	1000	-	.	gene_id "MSTRG.17304"; transcript_id "MSTRG.17304.2"; exon_number "4";
16	StringTie	exon	6765675	6765801	1000	+	.	gene_id "MSTRG.17362"; transcript_id "MSTRG.17362.1"; exon_number "1";
16	StringTie	exon	6768129	6768375	1000	+	.	gene_id "MSTRG.17362"; transcript_id "MSTRG.17362.1"; exon_number "2";
16	StringTie	exon	20791665	20792344	1000	-	.	gene_id "MSTRG.17427"; transcript_id "MSTRG.17427.1"; exon_number "1";
16	StringTie	exon	20803243	20804095	1000	-	.	gene_id "MSTRG.17427"; transcript_id "MSTRG.17427.1"; exon_number "2";
16	StringTie	exon	27612990	27613163	1000	+	.	gene_id "MSTRG.17517"; transcript_id "MSTRG.17517.1"; exon_number "1";
16	StringTie	exon	27615254	27615395	1000	+	.	gene_id "MSTRG.17517"; transcript_id "MSTRG.17517.1"; exon_number "2";
16	StringTie	exon	27615729	27616597	1000	+	.	gene_id "MSTRG.17517"; transcript_id "MSTRG.17517.1"; exon_number "3";
16	StringTie	exon	28290593	28290701	1000	+	.	gene_id "MSTRG.17550"; transcript_id "MSTRG.17550.1"; exon_number "1";
16	StringTie	exon	28306385	28306579	1000	+	.	gene_id "MSTRG.17550"; transcript_id "MSTRG.17550.1"; exon_number "2";
16	StringTie	exon	32149946	32150128	1000	-	.	gene_id "MSTRG.17707"; transcript_id "MSTRG.17707.1"; exon_number "1";
16	StringTie	exon	32153846	32153887	1000	-	.	gene_id "MSTRG.17707"; transcript_id "MSTRG.17707.1"; exon_number "2";
16	StringTie	exon	41925285	41925402	1000	+	.	gene_id "MSTRG.17923"; transcript_id "MSTRG.17923.1"; exon_number "1";
16	StringTie	exon	41941560	41941710	1000	+	.	gene_id "MSTRG.17923"; transcript_id "MSTRG.17923.1"; exon_number "2";
16	StringTie	exon	44686949	44688041	1000	-	.	gene_id "MSTRG.17963"; transcript_id "MSTRG.17963.1"; exon_number "1";
16	StringTie	exon	44690114	44690498	1000	-	.	gene_id "MSTRG.17963"; transcript_id "MSTRG.17963.1"; exon_number "2";
16	StringTie	exon	46412982	46413157	1000	-	.	gene_id "MSTRG.17970"; transcript_id "MSTRG.17970.1"; exon_number "1";
16	StringTie	exon	46414150	46414187	1000	-	.	gene_id "MSTRG.17970"; transcript_id "MSTRG.17970.1"; exon_number "2";
16	StringTie	exon	47252587	47252732	1000	-	.	gene_id "MSTRG.18019"; transcript_id "MSTRG.18019.1"; exon_number "1";
16	StringTie	exon	47254877	47255262	1000	-	.	gene_id "MSTRG.18019"; transcript_id "MSTRG.18019.1"; exon_number "2";
16	StringTie	exon	47261792	47261969	1000	-	.	gene_id "MSTRG.18019"; transcript_id "MSTRG.18019.1"; exon_number "3";
16	StringTie	exon	50516892	50518801	1000	-	.	gene_id "MSTRG.18108"; transcript_id "MSTRG.18108.1"; exon_number "1";
16	StringTie	exon	50527896	50528102	1000	-	.	gene_id "MSTRG.18108"; transcript_id "MSTRG.18108.1"; exon_number "2";
16	StringTie	exon	69066703	69066896	1000	+	.	gene_id "MSTRG.18318"; transcript_id "MSTRG.18318.1"; exon_number "1";
16	StringTie	exon	69067015	69067078	1000	+	.	gene_id "MSTRG.18318"; transcript_id "MSTRG.18318.1"; exon_number "2";
16	StringTie	exon	71276627	71276851	1000	+	.	gene_id "MSTRG.18323"; transcript_id "MSTRG.18323.1"; exon_number "1";
16	StringTie	exon	71281199	71281665	1000	+	.	gene_id "MSTRG.18323"; transcript_id "MSTRG.18323.1"; exon_number "2";
16	StringTie	exon	74216247	74216394	1000	-	.	gene_id "MSTRG.18378"; transcript_id "MSTRG.18378.1"; exon_number "1";
16	StringTie	exon	74221740	74221793	1000	-	.	gene_id "MSTRG.18378"; transcript_id "MSTRG.18378.1"; exon_number "2";
16	StringTie	exon	74821088	74821329	1000	+	.	gene_id "MSTRG.18380"; transcript_id "MSTRG.18380.1"; exon_number "1";
16	StringTie	exon	74823551	74823809	1000	+	.	gene_id "MSTRG.18380"; transcript_id "MSTRG.18380.1"; exon_number "2";
16	StringTie	exon	77146561	77146827	1000	+	.	gene_id "MSTRG.18413"; transcript_id "MSTRG.18413.1"; exon_number "1";
16	StringTie	exon	77147446	77147912	1000	+	.	gene_id "MSTRG.18413"; transcript_id "MSTRG.18413.1"; exon_number "2";
16	StringTie	exon	78318631	78319224	1000	+	.	gene_id "MSTRG.18420"; transcript_id "MSTRG.18420.1"; exon_number "1";
16	StringTie	exon	78319512	78320281	1000	+	.	gene_id "MSTRG.18420"; transcript_id "MSTRG.18420.1"; exon_number "2";
16	StringTie	exon	78844894	78846098	1000	-	.	gene_id "MSTRG.18422"; transcript_id "MSTRG.18422.1"; exon_number "1";
16	StringTie	exon	78846245	78849378	1000	-	.	gene_id "MSTRG.18422"; transcript_id "MSTRG.18422.1"; exon_number "2";
16	StringTie	exon	78884019	78884157	1000	+	.	gene_id "MSTRG.18424"; transcript_id "MSTRG.18424.1"; exon_number "1";
16	StringTie	exon	78884725	78884799	1000	+	.	gene_id "MSTRG.18424"; transcript_id "MSTRG.18424.1"; exon_number "2";
17	StringTie	exon	3290538	3290650	1000	-	.	gene_id "MSTRG.18460"; transcript_id "MSTRG.18460.1"; exon_number "1";
17	StringTie	exon	3295559	3295696	1000	-	.	gene_id "MSTRG.18460"; transcript_id "MSTRG.18460.1"; exon_number "2";
17	StringTie	exon	15047725	15047841	1000	-	.	gene_id "MSTRG.18732"; transcript_id "MSTRG.18732.2"; exon_number "1";
17	StringTie	exon	15051963	15052085	1000	-	.	gene_id "MSTRG.18732"; transcript_id "MSTRG.18732.2"; exon_number "2";
17	StringTie	exon	15068055	15068120	1000	-	.	gene_id "MSTRG.18732"; transcript_id "MSTRG.18732.2"; exon_number "3";
17	StringTie	exon	15070185	15070393	1000	-	.	gene_id "MSTRG.18732"; transcript_id "MSTRG.18732.2"; exon_number "4";
17	StringTie	exon	29986969	29987553	1000	-	.	gene_id "MSTRG.19076"; transcript_id "MSTRG.19076.1"; exon_number "1";
17	StringTie	exon	29988178	29989741	1000	-	.	gene_id "MSTRG.19076"; transcript_id "MSTRG.19076.1"; exon_number "2";
17	StringTie	exon	34164833	34164976	1000	+	.	gene_id "MSTRG.19233"; transcript_id "MSTRG.19233.1"; exon_number "1";
17	StringTie	exon	34166023	34166315	1000	+	.	gene_id "MSTRG.19233"; transcript_id "MSTRG.19233.1"; exon_number "2";
17	StringTie	exon	40100608	40100749	1000	+	.	gene_id "MSTRG.19378"; transcript_id "MSTRG.19378.1"; exon_number "1";
17	StringTie	exon	40101671	40101880	1000	+	.	gene_id "MSTRG.19378"; transcript_id "MSTRG.19378.1"; exon_number "2";
17	StringTie	exon	46686806	46686828	1000	+	.	gene_id "MSTRG.19531"; transcript_id "MSTRG.19531.2"; exon_number "1";
17	StringTie	exon	46686942	46687759	1000	+	.	gene_id "MSTRG.19531"; transcript_id "MSTRG.19531.2"; exon_number "2";
17	StringTie	exon	46874118	46874348	1000	+	.	gene_id "MSTRG.19536"; transcript_id "MSTRG.19536.1"; exon_number "1";
17	StringTie	exon	46874516	46874603	1000	+	.	gene_id "MSTRG.19536"; transcript_id "MSTRG.19536.1"; exon_number "2";
17	StringTie	exon	46883078	46883153	1000	+	.	gene_id "MSTRG.19536"; transcript_id "MSTRG.19536.1"; exon_number "3";
17	StringTie	exon	51923586	51923974	1000	-	.	gene_id "MSTRG.19662"; transcript_id "MSTRG.19662.1"; exon_number "1";
17	StringTie	exon	51929125	51929261	1000	-	.	gene_id "MSTRG.19662"; transcript_id "MSTRG.19662.1"; exon_number "2";
17	StringTie	exon	51929980	51930141	1000	-	.	gene_id "MSTRG.19662"; transcript_id "MSTRG.19662.1"; exon_number "3";
17	StringTie	exon	51923586	51923974	1000	-	.	gene_id "MSTRG.19662"; transcript_id "MSTRG.19662.2"; exon_number "1";
17	StringTie	exon	51927422	51930141	1000	-	.	gene_id "MSTRG.19662"; transcript_id "MSTRG.19662.2"; exon_number "2";
17	StringTie	exon	51923586	51927588	1000	-	.	gene_id "MSTRG.19662"; transcript_id "MSTRG.19662.3"; exon_number "1";
17	StringTie	exon	51929125	51929261	1000	-	.	gene_id "MSTRG.19662"; transcript_id "MSTRG.19662.3"; exon_number "2";
17	StringTie	exon	51929980	51930141	1000	-	.	gene_id "MSTRG.19662"; transcript_id "MSTRG.19662.3"; exon_number "3";
17	StringTie	exon	51927087	51927529	1000	-	.	gene_id "MSTRG.19662"; transcript_id "MSTRG.19662.4"; exon_number "1";
17	StringTie	exon	51929125	51929405	1000	-	.	gene_id "MSTRG.19662"; transcript_id "MSTRG.19662.4"; exon_number "2";
17	StringTie	exon	60079172	60079625	1000	+	.	gene_id "MSTRG.19781"; transcript_id "MSTRG.19781.1"; exon_number "1";
17	StringTie	exon	60081315	60081907	1000	+	.	gene_id "MSTRG.19781"; transcript_id "MSTRG.19781.1"; exon_number "2";
17	StringTie	exon	61794433	61794683	1000	+	.	gene_id "MSTRG.19807"; transcript_id "MSTRG.19807.1"; exon_number "1";
17	StringTie	exon	61799143	61799558	1000	+	.	gene_id "MSTRG.19807"; transcript_id "MSTRG.19807.1"; exon_number "2";
18	StringTie	exon	9178006	9178150	1000	+	.	gene_id "MSTRG.20005"; transcript_id "MSTRG.20005.1"; exon_number "1";
18	StringTie	exon	9178742	9178798	1000	+	.	gene_id "MSTRG.20005"; transcript_id "MSTRG.20005.1"; exon_number "2";
18	StringTie	exon	17858888	17859173	1000	+	.	gene_id "MSTRG.20234"; transcript_id "MSTRG.20234.1"; exon_number "1";
18	StringTie	exon	17889683	17889795	1000	+	.	gene_id "MSTRG.20234"; transcript_id "MSTRG.20234.1"; exon_number "2";
18	StringTie	exon	17911857	17912006	1000	+	.	gene_id "MSTRG.20234"; transcript_id "MSTRG.20234.1"; exon_number "3";
18	StringTie	exon	17947099	17947461	1000	+	.	gene_id "MSTRG.20234"; transcript_id "MSTRG.20234.1"; exon_number "4";
18	StringTie	exon	17883747	17883768	1000	+	.	gene_id "MSTRG.20234"; transcript_id "MSTRG.20234.2"; exon_number "1";
18	StringTie	exon	17911857	17912006	1000	+	.	gene_id "MSTRG.20234"; transcript_id "MSTRG.20234.2"; exon_number "2";
18	StringTie	exon	17947099	17947558	1000	+	.	gene_id "MSTRG.20234"; transcript_id "MSTRG.20234.2"; exon_number "3";
18	StringTie	exon	18030336	18030833	1000	+	.	gene_id "MSTRG.20255"; transcript_id "MSTRG.20255.1"; exon_number "1";
18	StringTie	exon	18031451	18032441	1000	+	.	gene_id "MSTRG.20255"; transcript_id "MSTRG.20255.1"; exon_number "2";
18	StringTie	exon	18016457	18016773	1000	+	.	gene_id "MSTRG.20257"; transcript_id "MSTRG.20257.1"; exon_number "1";
18	StringTie	exon	18025577	18025716	1000	+	.	gene_id "MSTRG.20257"; transcript_id "MSTRG.20257.1"; exon_number "2";
18	StringTie	exon	23709797	23710629	1000	-	.	gene_id "MSTRG.20397"; transcript_id "MSTRG.20397.1"; exon_number "1";
18	StringTie	exon	23711435	23711513	1000	-	.	gene_id "MSTRG.20397"; transcript_id "MSTRG.20397.1"; exon_number "2";
18	StringTie	exon	23721619	23721644	1000	-	.	gene_id "MSTRG.20397"; transcript_id "MSTRG.20397.1"; exon_number "3";
18	StringTie	exon	27475047	27475219	1000	-	.	gene_id "MSTRG.20485"; transcript_id "MSTRG.20485.1"; exon_number "1";
18	StringTie	exon	27479248	27479277	1000	-	.	gene_id "MSTRG.20485"; transcript_id "MSTRG.20485.1"; exon_number "2";
18	StringTie	exon	31785760	31785777	1000	-	.	gene_id "MSTRG.20609"; transcript_id "MSTRG.20609.1"; exon_number "1";
18	StringTie	exon	31785860	31786954	1000	-	.	gene_id "MSTRG.20609"; transcript_id "MSTRG.20609.1"; exon_number "2";
18	StringTie	exon	42227789	42227865	1000	+	.	gene_id "MSTRG.20899"; transcript_id "MSTRG.20899.1"; exon_number "1";
18	StringTie	exon	42234838	42235381	1000	+	.	gene_id "MSTRG.20899"; transcript_id "MSTRG.20899.1"; exon_number "2";
18	StringTie	exon	42096353	42096789	1000	-	.	gene_id "MSTRG.20905"; transcript_id "MSTRG.20905.1"; exon_number "1";
18	StringTie	exon	42097863	42097891	1000	-	.	gene_id "MSTRG.20905"; transcript_id "MSTRG.20905.1"; exon_number "2";
18	StringTie	exon	47030541	47030667	1000	-	.	gene_id "MSTRG.21023"; transcript_id "MSTRG.21023.1"; exon_number "1";
18	StringTie	exon	47031347	47031499	1000	-	.	gene_id "MSTRG.21023"; transcript_id "MSTRG.21023.1"; exon_number "2";
18	StringTie	exon	55606089	55606192	1000	+	.	gene_id "MSTRG.21245"; transcript_id "MSTRG.21245.1"; exon_number "1";
18	StringTie	exon	55606701	55606823	1000	+	.	gene_id "MSTRG.21245"; transcript_id "MSTRG.21245.1"; exon_number "2";
2	StringTie	exon	2480706	2481002	1000	+	.	gene_id "MSTRG.21367"; transcript_id "MSTRG.21367.1"; exon_number "1";
2	StringTie	exon	2482495	2482648	1000	+	.	gene_id "MSTRG.21367"; transcript_id "MSTRG.21367.1"; exon_number "2";
2	StringTie	exon	2483732	2484553	1000	+	.	gene_id "MSTRG.21367"; transcript_id "MSTRG.21367.1"; exon_number "3";
2	StringTie	exon	4169521	4171228	1000	-	.	gene_id "MSTRG.21383"; transcript_id "MSTRG.21383.1"; exon_number "1";
2	StringTie	exon	4171344	4171683	1000	-	.	gene_id "MSTRG.21383"; transcript_id "MSTRG.21383.1"; exon_number "2";
2	StringTie	exon	4169521	4170124	1000	-	.	gene_id "MSTRG.21383"; transcript_id "MSTRG.21383.2"; exon_number "1";
2	StringTie	exon	4171344	4171683	1000	-	.	gene_id "MSTRG.21383"; transcript_id "MSTRG.21383.2"; exon_number "2";
2	StringTie	exon	4929451	4929474	1000	-	.	gene_id "MSTRG.21405"; transcript_id "MSTRG.21405.1"; exon_number "1";
2	StringTie	exon	4930265	4931801	1000	-	.	gene_id "MSTRG.21405"; transcript_id "MSTRG.21405.1"; exon_number "2";
2	StringTie	exon	5492331	5493494	1000	-	.	gene_id "MSTRG.21479"; transcript_id "MSTRG.21479.1"; exon_number "1";
2	StringTie	exon	5495020	5495977	1000	-	.	gene_id "MSTRG.21479"; transcript_id "MSTRG.21479.1"; exon_number "2";
2	StringTie	exon	6325673	6325852	1000	+	.	gene_id "MSTRG.21496"; transcript_id "MSTRG.21496.1"; exon_number "1";
2	StringTie	exon	6332165	6332305	1000	+	.	gene_id "MSTRG.21496"; transcript_id "MSTRG.21496.1"; exon_number "2";
2	StringTie	exon	7047324	7047371	1000	-	.	gene_id "MSTRG.21552"; transcript_id "MSTRG.21552.1"; exon_number "1";
2	StringTie	exon	7047686	7048578	1000	-	.	gene_id "MSTRG.21552"; transcript_id "MSTRG.21552.1"; exon_number "2";
2	StringTie	exon	9067965	9068042	1000	-	.	gene_id "MSTRG.21659"; transcript_id "MSTRG.21659.1"; exon_number "1";
2	StringTie	exon	9069174	9069316	1000	-	.	gene_id "MSTRG.21659"; transcript_id "MSTRG.21659.1"; exon_number "2";
2	StringTie	exon	9683201	9683365	1000	-	.	gene_id "MSTRG.21681"; transcript_id "MSTRG.21681.1"; exon_number "1";
2	StringTie	exon	9692195	9692306	1000	-	.	gene_id "MSTRG.21681"; transcript_id "MSTRG.21681.1"; exon_number "2";
2	StringTie	exon	9667639	9668500	1000	-	.	gene_id "MSTRG.21685"; transcript_id "MSTRG.21685.1"; exon_number "1";
2	StringTie	exon	9671382	9671642	1000	-	.	gene_id "MSTRG.21685"; transcript_id "MSTRG.21685.1"; exon_number "2";
2	StringTie	exon	11923783	11924006	1000	+	.	gene_id "MSTRG.21740"; transcript_id "MSTRG.21740.1"; exon_number "1";
2	StringTie	exon	11924115	11924984	1000	+	.	gene_id "MSTRG.21740"; transcript_id "MSTRG.21740.1"; exon_number "2";
2	StringTie	exon	12279737	12280206	1000	+	.	gene_id "MSTRG.21748"; transcript_id "MSTRG.21748.1"; exon_number "1";
2	StringTie	exon	12281990	12282276	1000	+	.	gene_id "MSTRG.21748"; transcript_id "MSTRG.21748.1"; exon_number "2";
2	StringTie	exon	12279738	12280206	1000	+	.	gene_id "MSTRG.21748"; transcript_id "MSTRG.21748.2"; exon_number "1";
2	StringTie	exon	12285713	12286742	1000	+	.	gene_id "MSTRG.21748"; transcript_id "MSTRG.21748.2"; exon_number "2";
2	StringTie	exon	26382068	26383299	1000	-	.	gene_id "MSTRG.21991"; transcript_id "MSTRG.21991.1"; exon_number "1";
2	StringTie	exon	26389396	26389886	1000	-	.	gene_id "MSTRG.21991"; transcript_id "MSTRG.21991.1"; exon_number "2";
2	StringTie	exon	26392370	26392581	1000	-	.	gene_id "MSTRG.21991"; transcript_id "MSTRG.21991.1"; exon_number "3";
2	StringTie	exon	26417428	26417507	1000	-	.	gene_id "MSTRG.21991"; transcript_id "MSTRG.21991.1"; exon_number "4";
2	StringTie	exon	45622085	45622178	1000	+	.	gene_id "MSTRG.22228"; transcript_id "MSTRG.22228.1"; exon_number "1";
2	StringTie	exon	45629301	45629612	1000	+	.	gene_id "MSTRG.22228"; transcript_id "MSTRG.22228.1"; exon_number "2";
2	StringTie	exon	44614202	44614408	1000	+	.	gene_id "MSTRG.22251"; transcript_id "MSTRG.22251.1"; exon_number "1";
2	StringTie	exon	44617060	44617733	1000	+	.	gene_id "MSTRG.22251"; transcript_id "MSTRG.22251.1"; exon_number "2";
2	StringTie	exon	46671268	46671323	1000	+	.	gene_id "MSTRG.22252"; transcript_id "MSTRG.22252.1"; exon_number "1";
2	StringTie	exon	46673601	46673716	1000	+	.	gene_id "MSTRG.22252"; transcript_id "MSTRG.22252.1"; exon_number "2";
2	StringTie	exon	46714542	46714706	1000	+	.	gene_id "MSTRG.22252"; transcript_id "MSTRG.22252.1"; exon_number "3";
2	StringTie	exon	46746421	46746591	1000	+	.	gene_id "MSTRG.22252"; transcript_id "MSTRG.22252.1"; exon_number "4";
2	StringTie	exon	46767468	46767571	1000	+	.	gene_id "MSTRG.22252"; transcript_id "MSTRG.22252.1"; exon_number "5";
2	StringTie	exon	46769546	46770345	1000	+	.	gene_id "MSTRG.22252"; transcript_id "MSTRG.22252.1"; exon_number "6";
2	StringTie	exon	46714555	46714706	1000	+	.	gene_id "MSTRG.22252"; transcript_id "MSTRG.22252.2"; exon_number "1";
2	StringTie	exon	46767468	46767571	1000	+	.	gene_id "MSTRG.22252"; transcript_id "MSTRG.22252.2"; exon_number "2";
2	StringTie	exon	46769546	46770332	1000	+	.	gene_id "MSTRG.22252"; transcript_id "MSTRG.22252.2"; exon_number "3";
2	StringTie	exon	46767711	46767748	1000	+	.	gene_id "MSTRG.22252"; transcript_id "MSTRG.22252.3"; exon_number "1";
2	StringTie	exon	46769546	46770332	1000	+	.	gene_id "MSTRG.22252"; transcript_id "MSTRG.22252.3"; exon_number "2";
2	StringTie	exon	59744457	59744680	1000	+	.	gene_id "MSTRG.22448"; transcript_id "MSTRG.22448.1"; exon_number "1";
2	StringTie	exon	59751526	59751594	1000	+	.	gene_id "MSTRG.22448"; transcript_id "MSTRG.22448.1"; exon_number "2";
2	StringTie	exon	59754907	59755018	1000	+	.	gene_id "MSTRG.22448"; transcript_id "MSTRG.22448.1"; exon_number "3";
2	StringTie	exon	59769965	59770613	1000	+	.	gene_id "MSTRG.22448"; transcript_id "MSTRG.22448.1"; exon_number "4";
2	StringTie	exon	65168439	65168850	1000	-	.	gene_id "MSTRG.22565"; transcript_id "MSTRG.22565.1"; exon_number "1";
2	StringTie	exon	65172923	65173126	1000	-	.	gene_id "MSTRG.22565"; transcript_id "MSTRG.22565.1"; exon_number "2";
2	StringTie	exon	68884851	68887018	1000	-	.	gene_id "MSTRG.22692"; transcript_id "MSTRG.22692.2"; exon_number "1";
2	StringTie	exon	68887141	68887215	1000	-	.	gene_id "MSTRG.22692"; transcript_id "MSTRG.22692.2"; exon_number "2";
2	StringTie	exon	68887599	68887661	1000	-	.	gene_id "MSTRG.22692"; transcript_id "MSTRG.22692.2"; exon_number "3";
2	StringTie	exon	75976021	75976081	1000	+	.	gene_id "MSTRG.22980"; transcript_id "MSTRG.22980.2"; exon_number "1";
2	StringTie	exon	76039656	76039799	1000	+	.	gene_id "MSTRG.22980"; transcript_id "MSTRG.22980.2"; exon_number "2";
2	StringTie	exon	82006613	82006717	1000	-	.	gene_id "MSTRG.23199"; transcript_id "MSTRG.23199.1"; exon_number "1";
2	StringTie	exon	82006850	82006963	1000	-	.	gene_id "MSTRG.23199"; transcript_id "MSTRG.23199.1"; exon_number "2";
2	StringTie	exon	81613901	81614126	1000	+	.	gene_id "MSTRG.23211"; transcript_id "MSTRG.23211.1"; exon_number "1";
2	StringTie	exon	81616124	81616253	1000	+	.	gene_id "MSTRG.23211"; transcript_id "MSTRG.23211.1"; exon_number "2";
2	StringTie	exon	81618047	81618176	1000	+	.	gene_id "MSTRG.23211"; transcript_id "MSTRG.23211.1"; exon_number "3";
2	StringTie	exon	81641520	81642641	1000	+	.	gene_id "MSTRG.23211"; transcript_id "MSTRG.23211.1"; exon_number "4";
2	StringTie	exon	89906077	89906119	1000	+	.	gene_id "MSTRG.23347"; transcript_id "MSTRG.23347.1"; exon_number "1";
2	StringTie	exon	89911170	89911270	1000	+	.	gene_id "MSTRG.23347"; transcript_id "MSTRG.23347.1"; exon_number "2";
2	StringTie	exon	89914374	89914643	1000	+	.	gene_id "MSTRG.23347"; transcript_id "MSTRG.23347.1"; exon_number "3";
2	StringTie	exon	91039813	91039886	1000	-	.	gene_id "MSTRG.23404"; transcript_id "MSTRG.23404.1"; exon_number "1";
2	StringTie	exon	91074588	91074840	1000	-	.	gene_id "MSTRG.23404"; transcript_id "MSTRG.23404.1"; exon_number "2";
2	StringTie	exon	91072976	91073983	1000	-	.	gene_id "MSTRG.23404"; transcript_id "MSTRG.23404.2"; exon_number "1";
2	StringTie	exon	91074588	91074833	1000	-	.	gene_id "MSTRG.23404"; transcript_id "MSTRG.23404.2"; exon_number "2";
2	StringTie	exon	91075063	91075200	1000	+	.	gene_id "MSTRG.23405"; transcript_id "MSTRG.23405.1"; exon_number "1";
2	StringTie	exon	91076332	91076405	1000	+	.	gene_id "MSTRG.23405"; transcript_id "MSTRG.23405.1"; exon_number "2";
2	StringTie	exon	91076501	91076699	1000	+	.	gene_id "MSTRG.23405"; transcript_id "MSTRG.23405.1"; exon_number "3";
2	StringTie	exon	98367752	98367798	1000	-	.	gene_id "MSTRG.23456"; transcript_id "MSTRG.23456.1"; exon_number "1";
2	StringTie	exon	98368770	98368860	1000	-	.	gene_id "MSTRG.23456"; transcript_id "MSTRG.23456.1"; exon_number "2";
2	StringTie	exon	98371394	98371580	1000	-	.	gene_id "MSTRG.23456"; transcript_id "MSTRG.23456.1"; exon_number "3";
2	StringTie	exon	102591761	102591844	1000	+	.	gene_id "MSTRG.23543"; transcript_id "MSTRG.23543.1"; exon_number "1";
2	StringTie	exon	102607218	102607285	1000	+	.	gene_id "MSTRG.23543"; transcript_id "MSTRG.23543.1"; exon_number "2";
2	StringTie	exon	102677698	102677765	1000	+	.	gene_id "MSTRG.23543"; transcript_id "MSTRG.23543.1"; exon_number "3";
2	StringTie	exon	114974575	114974709	1000	-	.	gene_id "MSTRG.23644"; transcript_id "MSTRG.23644.1"; exon_number "1";
2	StringTie	exon	114979990	114980094	1000	-	.	gene_id "MSTRG.23644"; transcript_id "MSTRG.23644.1"; exon_number "2";
2	StringTie	exon	124465466	124465791	1000	+	.	gene_id "MSTRG.23822"; transcript_id "MSTRG.23822.1"; exon_number "1";
2	StringTie	exon	124651341	124651464	1000	+	.	gene_id "MSTRG.23822"; transcript_id "MSTRG.23822.1"; exon_number "2";
2	StringTie	exon	124757197	124757331	1000	+	.	gene_id "MSTRG.23822"; transcript_id "MSTRG.23822.1"; exon_number "3";
2	StringTie	exon	124465466	124465791	1000	+	.	gene_id "MSTRG.23822"; transcript_id "MSTRG.23822.3"; exon_number "1";
2	StringTie	exon	124651341	124651464	1000	+	.	gene_id "MSTRG.23822"; transcript_id "MSTRG.23822.3"; exon_number "2";
2	StringTie	exon	124732125	124732229	1000	+	.	gene_id "MSTRG.23822"; transcript_id "MSTRG.23822.3"; exon_number "3";
2	StringTie	exon	124757197	124757331	1000	+	.	gene_id "MSTRG.23822"; transcript_id "MSTRG.23822.3"; exon_number "4";
2	StringTie	exon	130521194	130521404	1000	+	.	gene_id "MSTRG.23913"; transcript_id "MSTRG.23913.1"; exon_number "1";
2	StringTie	exon	130528929	130529952	1000	+	.	gene_id "MSTRG.23913"; transcript_id "MSTRG.23913.1"; exon_number "2";
2	StringTie	exon	130939143	130940371	1000	-	.	gene_id "MSTRG.23931"; transcript_id "MSTRG.23931.1"; exon_number "1";
2	StringTie	exon	130950817	130951014	1000	-	.	gene_id "MSTRG.23931"; transcript_id "MSTRG.23931.1"; exon_number "2";
2	StringTie	exon	131838344	131838410	1000	+	.	gene_id "MSTRG.23949"; transcript_id "MSTRG.23949.1"; exon_number "1";
2	StringTie	exon	131847629	131848540	1000	+	.	gene_id "MSTRG.23949"; transcript_id "MSTRG.23949.1"; exon_number "2";
2	StringTie	exon	134299698	134299974	1000	-	.	gene_id "MSTRG.24005"; transcript_id "MSTRG.24005.1"; exon_number "1";
2	StringTie	exon	134303766	134304107	1000	-	.	gene_id "MSTRG.24005"; transcript_id "MSTRG.24005.1"; exon_number "2";
2	StringTie	exon	141481024	141481264	1000	-	.	gene_id "MSTRG.24200"; transcript_id "MSTRG.24200.1"; exon_number "1";
2	StringTie	exon	141481401	141481709	1000	-	.	gene_id "MSTRG.24200"; transcript_id "MSTRG.24200.1"; exon_number "2";
3	StringTie	exon	1719350	1719445	1000	-	.	gene_id "MSTRG.24491"; transcript_id "MSTRG.24491.1"; exon_number "1";
3	StringTie	exon	1720577	1720743	1000	-	.	gene_id "MSTRG.24491"; transcript_id "MSTRG.24491.1"; exon_number "2";
3	StringTie	exon	3547691	3547766	1000	+	.	gene_id "MSTRG.24538"; transcript_id "MSTRG.24538.1"; exon_number "1";
3	StringTie	exon	3551528	3552627	1000	+	.	gene_id "MSTRG.24538"; transcript_id "MSTRG.24538.1"; exon_number "2";
3	StringTie	exon	7894302	7894478	1000	-	.	gene_id "MSTRG.24686"; transcript_id "MSTRG.24686.1"; exon_number "1";
3	StringTie	exon	7898709	7898758	1000	-	.	gene_id "MSTRG.24686"; transcript_id "MSTRG.24686.1"; exon_number "2";
3	StringTie	exon	12042153	12042224	1000	+	.	gene_id "MSTRG.24884"; transcript_id "MSTRG.24884.1"; exon_number "1";
3	StringTie	exon	12060253	12060443	1000	+	.	gene_id "MSTRG.24884"; transcript_id "MSTRG.24884.1"; exon_number "2";
3	StringTie	exon	16765377	16765600	1000	-	.	gene_id "MSTRG.24922"; transcript_id "MSTRG.24922.1"; exon_number "1";
3	StringTie	exon	16781500	16781618	1000	-	.	gene_id "MSTRG.24922"; transcript_id "MSTRG.24922.1"; exon_number "2";
3	StringTie	exon	16765377	16765603	1000	-	.	gene_id "MSTRG.24922"; transcript_id "MSTRG.24922.2"; exon_number "1";
3	StringTie	exon	16781500	16781618	1000	-	.	gene_id "MSTRG.24922"; transcript_id "MSTRG.24922.2"; exon_number "2";
3	StringTie	exon	17773613	17773706	1000	-	.	gene_id "MSTRG.25109"; transcript_id "MSTRG.25109.1"; exon_number "1";
3	StringTie	exon	17776672	17776839	1000	-	.	gene_id "MSTRG.25109"; transcript_id "MSTRG.25109.1"; exon_number "2";
3	StringTie	exon	37454128	37454206	1000	+	.	gene_id "MSTRG.25463"; transcript_id "MSTRG.25463.1"; exon_number "1";
3	StringTie	exon	37455510	37455907	1000	+	.	gene_id "MSTRG.25463"; transcript_id "MSTRG.25463.1"; exon_number "2";
3	StringTie	exon	39177682	39177913	1000	-	.	gene_id "MSTRG.25575"; transcript_id "MSTRG.25575.1"; exon_number "1";
3	StringTie	exon	39180009	39180251	1000	-	.	gene_id "MSTRG.25575"; transcript_id "MSTRG.25575.1"; exon_number "2";
3	StringTie	exon	39180610	39180721	1000	-	.	gene_id "MSTRG.25575"; transcript_id "MSTRG.25575.1"; exon_number "3";
3	StringTie	exon	40167347	40167989	1000	-	.	gene_id "MSTRG.25602"; transcript_id "MSTRG.25602.2"; exon_number "1";
3	StringTie	exon	40168947	40171105	1000	-	.	gene_id "MSTRG.25602"; transcript_id "MSTRG.25602.2"; exon_number "2";
3	StringTie	exon	41038466	41039426	1000	-	.	gene_id "MSTRG.25656"; transcript_id "MSTRG.25656.1"; exon_number "1";
3	StringTie	exon	41040090	41040428	1000	-	.	gene_id "MSTRG.25656"; transcript_id "MSTRG.25656.1"; exon_number "2";
3	StringTie	exon	42978216	42979203	1000	-	.	gene_id "MSTRG.25764"; transcript_id "MSTRG.25764.1"; exon_number "1";
3	StringTie	exon	42981340	42982020	1000	-	.	gene_id "MSTRG.25764"; transcript_id "MSTRG.25764.1"; exon_number "2";
3	StringTie	exon	44022817	44023005	1000	+	.	gene_id "MSTRG.25807"; transcript_id "MSTRG.25807.1"; exon_number "1";
3	StringTie	exon	44023826	44024483	1000	+	.	gene_id "MSTRG.25807"; transcript_id "MSTRG.25807.1"; exon_number "2";
3	StringTie	exon	44185555	44185682	1000	+	.	gene_id "MSTRG.25814"; transcript_id "MSTRG.25814.5"; exon_number "1";
3	StringTie	exon	44194828	44195099	1000	+	.	gene_id "MSTRG.25814"; transcript_id "MSTRG.25814.5"; exon_number "2";
3	StringTie	exon	46603915	46604267	1000	-	.	gene_id "MSTRG.25859"; transcript_id "MSTRG.25859.1"; exon_number "1";
3	StringTie	exon	46624401	46624654	1000	-	.	gene_id "MSTRG.25859"; transcript_id "MSTRG.25859.1"; exon_number "2";
3	StringTie	exon	51187538	51187711	1000	-	.	gene_id "MSTRG.25911"; transcript_id "MSTRG.25911.1"; exon_number "1";
3	StringTie	exon	51188924	51189030	1000	-	.	gene_id "MSTRG.25911"; transcript_id "MSTRG.25911.1"; exon_number "2";
3	StringTie	exon	51258092	51258584	1000	-	.	gene_id "MSTRG.25916"; transcript_id "MSTRG.25916.1"; exon_number "1";
3	StringTie	exon	51261445	51261714	1000	-	.	gene_id "MSTRG.25916"; transcript_id "MSTRG.25916.1"; exon_number "2";
3	StringTie	exon	57388667	57388797	1000	+	.	gene_id "MSTRG.26070"; transcript_id "MSTRG.26070.1"; exon_number "1";
3	StringTie	exon	57392601	57392693	1000	+	.	gene_id "MSTRG.26070"; transcript_id "MSTRG.26070.1"; exon_number "2";
3	StringTie	exon	73911667	73912681	1000	-	.	gene_id "MSTRG.26390"; transcript_id "MSTRG.26390.4"; exon_number "1";
3	StringTie	exon	73915693	73915911	1000	-	.	gene_id "MSTRG.26390"; transcript_id "MSTRG.26390.4"; exon_number "2";
3	StringTie	exon	73911667	73912455	1000	-	.	gene_id "MSTRG.26390"; transcript_id "MSTRG.26390.5"; exon_number "1";
3	StringTie	exon	73915693	73915911	1000	-	.	gene_id "MSTRG.26390"; transcript_id "MSTRG.26390.5"; exon_number "2";
3	StringTie	exon	87149641	87149823	1000	-	.	gene_id "MSTRG.26652"; transcript_id "MSTRG.26652.1"; exon_number "1";
3	StringTie	exon	87231185	87231395	1000	-	.	gene_id "MSTRG.26652"; transcript_id "MSTRG.26652.1"; exon_number "2";
3	StringTie	exon	96850177	96850323	1000	-	.	gene_id "MSTRG.26798"; transcript_id "MSTRG.26798.1"; exon_number "1";
3	StringTie	exon	96870764	96870937	1000	-	.	gene_id "MSTRG.26798"; transcript_id "MSTRG.26798.1"; exon_number "2";
3	StringTie	exon	96871250	96871301	1000	-	.	gene_id "MSTRG.26798"; transcript_id "MSTRG.26798.1"; exon_number "3";
3	StringTie	exon	96872206	96872399	1000	-	.	gene_id "MSTRG.26798"; transcript_id "MSTRG.26798.1"; exon_number "4";
3	StringTie	exon	96850245	96850323	1000	-	.	gene_id "MSTRG.26798"; transcript_id "MSTRG.26798.2"; exon_number "1";
3	StringTie	exon	96870764	96871301	1000	-	.	gene_id "MSTRG.26798"; transcript_id "MSTRG.26798.2"; exon_number "2";
3	StringTie	exon	96872206	96872415	1000	-	.	gene_id "MSTRG.26798"; transcript_id "MSTRG.26798.2"; exon_number "3";
3	StringTie	exon	96870493	96870937	1000	-	.	gene_id "MSTRG.26798"; transcript_id "MSTRG.26798.3"; exon_number "1";
3	StringTie	exon	96871550	96871948	1000	-	.	gene_id "MSTRG.26798"; transcript_id "MSTRG.26798.3"; exon_number "2";
3	StringTie	exon	97578109	97578550	1000	-	.	gene_id "MSTRG.26824"; transcript_id "MSTRG.26824.1"; exon_number "1";
3	StringTie	exon	97580511	97580629	1000	-	.	gene_id "MSTRG.26824"; transcript_id "MSTRG.26824.1"; exon_number "2";
3	StringTie	exon	117726240	117727070	1000	-	.	gene_id "MSTRG.27192"; transcript_id "MSTRG.27192.1"; exon_number "1";
3	StringTie	exon	117727912	117728263	1000	-	.	gene_id "MSTRG.27192"; transcript_id "MSTRG.27192.1"; exon_number "2";
3	StringTie	exon	118015947	118016142	1000	-	.	gene_id "MSTRG.27209"; transcript_id "MSTRG.27209.1"; exon_number "1";
3	StringTie	exon	118016880	118017221	1000	-	.	gene_id "MSTRG.27209"; transcript_id "MSTRG.27209.1"; exon_number "2";
3	StringTie	exon	121686441	121687211	1000	-	.	gene_id "MSTRG.27235"; transcript_id "MSTRG.27235.1"; exon_number "1";
3	StringTie	exon	121688432	121688504	1000	-	.	gene_id "MSTRG.27235"; transcript_id "MSTRG.27235.1"; exon_number "2";
3	StringTie	exon	124724375	124724554	1000	-	.	gene_id "MSTRG.27248"; transcript_id "MSTRG.27248.1"; exon_number "1";
3	StringTie	exon	124724694	124724772	1000	-	.	gene_id "MSTRG.27248"; transcript_id "MSTRG.27248.1"; exon_number "2";
3	StringTie	exon	126346956	126347321	1000	-	.	gene_id "MSTRG.27269"; transcript_id "MSTRG.27269.1"; exon_number "1";
3	StringTie	exon	126347819	126347980	1000	-	.	gene_id "MSTRG.27269"; transcript_id "MSTRG.27269.1"; exon_number "2";
3	StringTie	exon	127513903	127513989	1000	+	.	gene_id "MSTRG.27295"; transcript_id "MSTRG.27295.1"; exon_number "1";
3	StringTie	exon	127516595	127516793	1000	+	.	gene_id "MSTRG.27295"; transcript_id "MSTRG.27295.1"; exon_number "2";
3	StringTie	exon	127869835	127870152	1000	-	.	gene_id "MSTRG.27301"; transcript_id "MSTRG.27301.1"; exon_number "1";
3	StringTie	exon	127870991	127871133	1000	-	.	gene_id "MSTRG.27301"; transcript_id "MSTRG.27301.1"; exon_number "2";
3	StringTie	exon	127874148	127874247	1000	-	.	gene_id "MSTRG.27301"; transcript_id "MSTRG.27301.1"; exon_number "3";
4	StringTie	exon	153340	153976	1000	-	.	gene_id "MSTRG.27353"; transcript_id "MSTRG.27353.1"; exon_number "1";
4	StringTie	exon	157993	158600	1000	-	.	gene_id "MSTRG.27353"; transcript_id "MSTRG.27353.1"; exon_number "2";
4	StringTie	exon	158761	159095	1000	-	.	gene_id "MSTRG.27353"; transcript_id "MSTRG.27353.1"; exon_number "3";
4	StringTie	exon	153374	153976	1000	-	.	gene_id "MSTRG.27353"; transcript_id "MSTRG.27353.2"; exon_number "1";
4	StringTie	exon	157993	158603	1000	-	.	gene_id "MSTRG.27353"; transcript_id "MSTRG.27353.2"; exon_number "2";
4	StringTie	exon	158761	159078	1000	-	.	gene_id "MSTRG.27353"; transcript_id "MSTRG.27353.2"; exon_number "3";
4	StringTie	exon	945745	945844	1000	+	.	gene_id "MSTRG.27395"; transcript_id "MSTRG.27395.5"; exon_number "1";
4	StringTie	exon	946421	946542	1000	+	.	gene_id "MSTRG.27395"; transcript_id "MSTRG.27395.5"; exon_number "2";
4	StringTie	exon	947676	949143	1000	+	.	gene_id "MSTRG.27395"; transcript_id "MSTRG.27395.5"; exon_number "3";
4	StringTie	exon	945745	945844	1000	+	.	gene_id "MSTRG.27395"; transcript_id "MSTRG.27395.6"; exon_number "1";
4	StringTie	exon	946421	948103	1000	+	.	gene_id "MSTRG.27395"; transcript_id "MSTRG.27395.6"; exon_number "2";
4	StringTie	exon	949641	949851	1000	+	.	gene_id "MSTRG.27395"; transcript_id "MSTRG.27395.6"; exon_number "3";
4	StringTie	exon	6822835	6823150	1000	-	.	gene_id "MSTRG.27438"; transcript_id "MSTRG.27438.1"; exon_number "1";
4	StringTie	exon	6825292	6825363	1000	-	.	gene_id "MSTRG.27438"; transcript_id "MSTRG.27438.1"; exon_number "2";
4	StringTie	exon	6836290	6836485	1000	-	.	gene_id "MSTRG.27438"; transcript_id "MSTRG.27438.1"; exon_number "3";
4	StringTie	exon	7372880	7373237	1000	+	.	gene_id "MSTRG.27494"; transcript_id "MSTRG.27494.1"; exon_number "1";
4	StringTie	exon	7375521	7375568	1000	+	.	gene_id "MSTRG.27494"; transcript_id "MSTRG.27494.1"; exon_number "2";
4	StringTie	exon	7004350	7004488	1000	+	.	gene_id "MSTRG.27497"; transcript_id "MSTRG.27497.1"; exon_number "1";
4	StringTie	exon	7009351	7009961	1000	+	.	gene_id "MSTRG.27497"; transcript_id "MSTRG.27497.1"; exon_number "2";
4	StringTie	exon	7753482	7753707	1000	-	.	gene_id "MSTRG.27502"; transcript_id "MSTRG.27502.1"; exon_number "1";
4	StringTie	exon	7758984	7759249	1000	-	.	gene_id "MSTRG.27502"; transcript_id "MSTRG.27502.1"; exon_number "2";
4	StringTie	exon	15396262	15396389	1000	+	.	gene_id "MSTRG.27594"; transcript_id "MSTRG.27594.1"; exon_number "1";
4	StringTie	exon	15396593	15396703	1000	+	.	gene_id "MSTRG.27594"; transcript_id "MSTRG.27594.1"; exon_number "2";
4	StringTie	exon	15396916	15397127	1000	+	.	gene_id "MSTRG.27594"; transcript_id "MSTRG.27594.1"; exon_number "3";
4	StringTie	exon	17320820	17320947	1000	-	.	gene_id "MSTRG.27670"; transcript_id "MSTRG.27670.1"; exon_number "1";
4	StringTie	exon	17321918	17322197	1000	-	.	gene_id "MSTRG.27670"; transcript_id "MSTRG.27670.1"; exon_number "2";
4	StringTie	exon	17084356	17084447	1000	-	.	gene_id "MSTRG.27671"; transcript_id "MSTRG.27671.2"; exon_number "1";
4	StringTie	exon	17104614	17104698	1000	-	.	gene_id "MSTRG.27671"; transcript_id "MSTRG.27671.2"; exon_number "2";
4	StringTie	exon	17105740	17105870	1000	-	.	gene_id "MSTRG.27671"; transcript_id "MSTRG.27671.2"; exon_number "3";
4	StringTie	exon	17216751	17216912	1000	-	.	gene_id "MSTRG.27671"; transcript_id "MSTRG.27671.2"; exon_number "4";
4	StringTie	exon	17161632	17161927	1000	-	.	gene_id "MSTRG.27673"; transcript_id "MSTRG.27673.1"; exon_number "1";
4	StringTie	exon	17166602	17166687	1000	-	.	gene_id "MSTRG.27673"; transcript_id "MSTRG.27673.1"; exon_number "2";
4	StringTie	exon	17169953	17171259	1000	-	.	gene_id "MSTRG.27673"; transcript_id "MSTRG.27673.1"; exon_number "3";
4	StringTie	exon	22636035	22636384	1000	-	.	gene_id "MSTRG.27743"; transcript_id "MSTRG.27743.1"; exon_number "1";
4	StringTie	exon	22636966	22637434	1000	-	.	gene_id "MSTRG.27743"; transcript_id "MSTRG.27743.1"; exon_number "2";
4	StringTie	exon	22638982	22639111	1000	-	.	gene_id "MSTRG.27743"; transcript_id "MSTRG.27743.1"; exon_number "3";
4	StringTie	exon	22796422	22796474	1000	-	.	gene_id "MSTRG.27744"; transcript_id "MSTRG.27744.1"; exon_number "1";
4	StringTie	exon	22815622	22815887	1000	-	.	gene_id "MSTRG.27744"; transcript_id "MSTRG.27744.1"; exon_number "2";
4	StringTie	exon	34328253	34329154	1000	-	.	gene_id "MSTRG.27879"; transcript_id "MSTRG.27879.1"; exon_number "1";
4	StringTie	exon	34332246	34332494	1000	-	.	gene_id "MSTRG.27879"; transcript_id "MSTRG.27879.1"; exon_number "2";
4	StringTie	exon	34328429	34328905	1000	-	.	gene_id "MSTRG.27879"; transcript_id "MSTRG.27879.2"; exon_number "1";
4	StringTie	exon	34329011	34329154	1000	-	.	gene_id "MSTRG.27879"; transcript_id "MSTRG.27879.2"; exon_number "2";
4	StringTie	exon	34332246	34332485	1000	-	.	gene_id "MSTRG.27879"; transcript_id "MSTRG.27879.2"; exon_number "3";
4	StringTie	exon	39113926	39114124	1000	+	.	gene_id "MSTRG.27989"; transcript_id "MSTRG.27989.1"; exon_number "1";
4	StringTie	exon	39115975	39116367	1000	+	.	gene_id "MSTRG.27989"; transcript_id "MSTRG.27989.1"; exon_number "2";
4	StringTie	exon	40672368	40672545	1000	+	.	gene_id "MSTRG.28005"; transcript_id "MSTRG.28005.1"; exon_number "1";
4	StringTie	exon	40703621	40704051	1000	+	.	gene_id "MSTRG.28005"; transcript_id "MSTRG.28005.1"; exon_number "2";
4	StringTie	exon	41920023	41920151	1000	-	.	gene_id "MSTRG.28025"; transcript_id "MSTRG.28025.1"; exon_number "1";
4	StringTie	exon	41920479	41920560	1000	-	.	gene_id "MSTRG.28025"; transcript_id "MSTRG.28025.1"; exon_number "2";
4	StringTie	exon	43464689	43464996	1000	-	.	gene_id "MSTRG.28046"; transcript_id "MSTRG.28046.1"; exon_number "1";
4	StringTie	exon	43466466	43466733	1000	-	.	gene_id "MSTRG.28046"; transcript_id "MSTRG.28046.1"; exon_number "2";
4	StringTie	exon	43470019	43470317	1000	-	.	gene_id "MSTRG.28046"; transcript_id "MSTRG.28046.1"; exon_number "3";
4	StringTie	exon	53945743	53945761	1000	-	.	gene_id "MSTRG.28140"; transcript_id "MSTRG.28140.1"; exon_number "1";
4	StringTie	exon	53953505	53954300	1000	-	.	gene_id "MSTRG.28140"; transcript_id "MSTRG.28140.1"; exon_number "2";
4	StringTie	exon	70929162	70929456	1000	+	.	gene_id "MSTRG.28476"; transcript_id "MSTRG.28476.1"; exon_number "1";
4	StringTie	exon	70933461	70933580	1000	+	.	gene_id "MSTRG.28476"; transcript_id "MSTRG.28476.1"; exon_number "2";
4	StringTie	exon	75294213	75294486	1000	-	.	gene_id "MSTRG.28496"; transcript_id "MSTRG.28496.1"; exon_number "1";
4	StringTie	exon	75295842	75296294	1000	-	.	gene_id "MSTRG.28496"; transcript_id "MSTRG.28496.1"; exon_number "2";
4	StringTie	exon	82162872	82163019	1000	+	.	gene_id "MSTRG.28616"; transcript_id "MSTRG.28616.1"; exon_number "1";
4	StringTie	exon	82164092	82164278	1000	+	.	gene_id "MSTRG.28616"; transcript_id "MSTRG.28616.1"; exon_number "2";
4	StringTie	exon	82794818	82794952	1000	+	.	gene_id "MSTRG.28643"; transcript_id "MSTRG.28643.1"; exon_number "1";
4	StringTie	exon	82799779	82800176	1000	+	.	gene_id "MSTRG.28643"; transcript_id "MSTRG.28643.1"; exon_number "2";
4	StringTie	exon	85786007	85786053	1000	-	.	gene_id "MSTRG.28677"; transcript_id "MSTRG.28677.1"; exon_number "1";
4	StringTie	exon	85786139	85786341	1000	-	.	gene_id "MSTRG.28677"; transcript_id "MSTRG.28677.1"; exon_number "2";
4	StringTie	exon	87194354	87194512	1000	+	.	gene_id "MSTRG.28705"; transcript_id "MSTRG.28705.1"; exon_number "1";
4	StringTie	exon	87246424	87246728	1000	+	.	gene_id "MSTRG.28705"; transcript_id "MSTRG.28705.1"; exon_number "2";
4	StringTie	exon	87599258	87599385	1000	-	.	gene_id "MSTRG.28709"; transcript_id "MSTRG.28709.1"; exon_number "1";
4	StringTie	exon	87599694	87599836	1000	-	.	gene_id "MSTRG.28709"; transcript_id "MSTRG.28709.1"; exon_number "2";
4	StringTie	exon	88504748	88505000	1000	-	.	gene_id "MSTRG.28739"; transcript_id "MSTRG.28739.1"; exon_number "1";
4	StringTie	exon	88508461	88508744	1000	-	.	gene_id "MSTRG.28739"; transcript_id "MSTRG.28739.1"; exon_number "2";
4	StringTie	exon	95117769	95117905	1000	+	.	gene_id "MSTRG.28931"; transcript_id "MSTRG.28931.1"; exon_number "1";
4	StringTie	exon	95123776	95124345	1000	+	.	gene_id "MSTRG.28931"; transcript_id "MSTRG.28931.1"; exon_number "2";
4	StringTie	exon	95385257	95385309	1000	+	.	gene_id "MSTRG.28946"; transcript_id "MSTRG.28946.1"; exon_number "1";
4	StringTie	exon	95394519	95394615	1000	+	.	gene_id "MSTRG.28946"; transcript_id "MSTRG.28946.1"; exon_number "2";
4	StringTie	exon	95396282	95396353	1000	+	.	gene_id "MSTRG.28946"; transcript_id "MSTRG.28946.1"; exon_number "3";
4	StringTie	exon	97319545	97319692	1000	+	.	gene_id "MSTRG.29007"; transcript_id "MSTRG.29007.1"; exon_number "1";
4	StringTie	exon	97321554	97321814	1000	+	.	gene_id "MSTRG.29007"; transcript_id "MSTRG.29007.1"; exon_number "2";
4	StringTie	exon	99157320	99157544	1000	+	.	gene_id "MSTRG.29094"; transcript_id "MSTRG.29094.1"; exon_number "1";
4	StringTie	exon	99160745	99160911	1000	+	.	gene_id "MSTRG.29094"; transcript_id "MSTRG.29094.1"; exon_number "2";
4	StringTie	exon	99157320	99157544	1000	+	.	gene_id "MSTRG.29094"; transcript_id "MSTRG.29094.2"; exon_number "1";
4	StringTie	exon	99160832	99160862	1000	+	.	gene_id "MSTRG.29094"; transcript_id "MSTRG.29094.2"; exon_number "2";
4	StringTie	exon	100440783	100442165	1000	-	.	gene_id "MSTRG.29147"; transcript_id "MSTRG.29147.1"; exon_number "1";
4	StringTie	exon	100443084	100443194	1000	-	.	gene_id "MSTRG.29147"; transcript_id "MSTRG.29147.1"; exon_number "2";
4	StringTie	exon	100443631	100443764	1000	-	.	gene_id "MSTRG.29147"; transcript_id "MSTRG.29147.1"; exon_number "3";
4	StringTie	exon	100440821	100442165	1000	-	.	gene_id "MSTRG.29147"; transcript_id "MSTRG.29147.2"; exon_number "1";
4	StringTie	exon	100443084	100443194	1000	-	.	gene_id "MSTRG.29147"; transcript_id "MSTRG.29147.2"; exon_number "2";
4	StringTie	exon	100443663	100443760	1000	-	.	gene_id "MSTRG.29147"; transcript_id "MSTRG.29147.2"; exon_number "3";
4	StringTie	exon	110971582	110971740	1000	+	.	gene_id "MSTRG.29489"; transcript_id "MSTRG.29489.1"; exon_number "1";
4	StringTie	exon	110973988	110974520	1000	+	.	gene_id "MSTRG.29489"; transcript_id "MSTRG.29489.1"; exon_number "2";
4	StringTie	exon	114947934	114948177	1000	-	.	gene_id "MSTRG.29499"; transcript_id "MSTRG.29499.1"; exon_number "1";
4	StringTie	exon	114960609	114960856	1000	-	.	gene_id "MSTRG.29499"; transcript_id "MSTRG.29499.1"; exon_number "2";
4	StringTie	exon	117078914	117079359	1000	-	.	gene_id "MSTRG.29514"; transcript_id "MSTRG.29514.2"; exon_number "1";
4	StringTie	exon	117087128	117087417	1000	-	.	gene_id "MSTRG.29514"; transcript_id "MSTRG.29514.2"; exon_number "2";
4	StringTie	exon	119804743	119806107	1000	-	.	gene_id "MSTRG.29576"; transcript_id "MSTRG.29576.1"; exon_number "1";
4	StringTie	exon	119840829	119840934	1000	-	.	gene_id "MSTRG.29576"; transcript_id "MSTRG.29576.1"; exon_number "2";
4	StringTie	exon	119918465	119918506	1000	-	.	gene_id "MSTRG.29576"; transcript_id "MSTRG.29576.1"; exon_number "3";
4	StringTie	exon	119805609	119806107	1000	-	.	gene_id "MSTRG.29576"; transcript_id "MSTRG.29576.2"; exon_number "1";
4	StringTie	exon	119840829	119840934	1000	-	.	gene_id "MSTRG.29576"; transcript_id "MSTRG.29576.2"; exon_number "2";
4	StringTie	exon	119931010	119931142	1000	-	.	gene_id "MSTRG.29576"; transcript_id "MSTRG.29576.2"; exon_number "3";
4	StringTie	exon	119831569	119831722	1000	-	.	gene_id "MSTRG.29576"; transcript_id "MSTRG.29576.3"; exon_number "1";
4	StringTie	exon	119840670	119840731	1000	-	.	gene_id "MSTRG.29576"; transcript_id "MSTRG.29576.3"; exon_number "2";
4	StringTie	exon	119840829	119840934	1000	-	.	gene_id "MSTRG.29576"; transcript_id "MSTRG.29576.3"; exon_number "3";
4	StringTie	exon	119931010	119931142	1000	-	.	gene_id "MSTRG.29576"; transcript_id "MSTRG.29576.3"; exon_number "4";
4	StringTie	exon	121158419	121158585	1000	+	.	gene_id "MSTRG.29579"; transcript_id "MSTRG.29579.1"; exon_number "1";
4	StringTie	exon	121160546	121160621	1000	+	.	gene_id "MSTRG.29579"; transcript_id "MSTRG.29579.1"; exon_number "2";
4	StringTie	exon	121173076	121173228	1000	+	.	gene_id "MSTRG.29579"; transcript_id "MSTRG.29579.1"; exon_number "3";
4	StringTie	exon	121174023	121174164	1000	+	.	gene_id "MSTRG.29579"; transcript_id "MSTRG.29579.1"; exon_number "4";
4	StringTie	exon	121175248	121175347	1000	+	.	gene_id "MSTRG.29579"; transcript_id "MSTRG.29579.1"; exon_number "5";
4	StringTie	exon	122802225	122803723	1000	+	.	gene_id "MSTRG.29619"; transcript_id "MSTRG.29619.1"; exon_number "1";
4	StringTie	exon	122807037	122807176	1000	+	.	gene_id "MSTRG.29619"; transcript_id "MSTRG.29619.1"; exon_number "2";
4	StringTie	exon	122965219	122965516	1000	-	.	gene_id "MSTRG.29624"; transcript_id "MSTRG.29624.1"; exon_number "1";
4	StringTie	exon	122981292	122981518	1000	-	.	gene_id "MSTRG.29624"; transcript_id "MSTRG.29624.1"; exon_number "2";
4	StringTie	exon	122967152	122967376	1000	+	.	gene_id "MSTRG.29625"; transcript_id "MSTRG.29625.1"; exon_number "1";
4	StringTie	exon	122969696	122970359	1000	+	.	gene_id "MSTRG.29625"; transcript_id "MSTRG.29625.1"; exon_number "2";
4	StringTie	exon	123838517	123838783	1000	-	.	gene_id "MSTRG.29684"; transcript_id "MSTRG.29684.1"; exon_number "1";
4	StringTie	exon	123843255	123843325	1000	-	.	gene_id "MSTRG.29684"; transcript_id "MSTRG.29684.1"; exon_number "2";
4	StringTie	exon	125459507	125459544	1000	+	.	gene_id "MSTRG.29709"; transcript_id "MSTRG.29709.1"; exon_number "1";
4	StringTie	exon	125470441	125470829	1000	+	.	gene_id "MSTRG.29709"; transcript_id "MSTRG.29709.1"; exon_number "2";
4	StringTie	exon	125477242	125477793	1000	+	.	gene_id "MSTRG.29709"; transcript_id "MSTRG.29709.1"; exon_number "3";
4	StringTie	exon	130695152	130698128	1000	-	.	gene_id "MSTRG.29856"; transcript_id "MSTRG.29856.1"; exon_number "1";
4	StringTie	exon	130700508	130700710	1000	-	.	gene_id "MSTRG.29856"; transcript_id "MSTRG.29856.1"; exon_number "2";
4	StringTie	exon	130701511	130701597	1000	-	.	gene_id "MSTRG.29856"; transcript_id "MSTRG.29856.1"; exon_number "3";
5	StringTie	exon	2812047	2812422	1000	+	.	gene_id "MSTRG.29891"; transcript_id "MSTRG.29891.1"; exon_number "1";
5	StringTie	exon	2813738	2814029	1000	+	.	gene_id "MSTRG.29891"; transcript_id "MSTRG.29891.1"; exon_number "2";
5	StringTie	exon	3438370	3442787	1000	-	.	gene_id "MSTRG.29917"; transcript_id "MSTRG.29917.1"; exon_number "1";
5	StringTie	exon	3453951	3454018	1000	-	.	gene_id "MSTRG.29917"; transcript_id "MSTRG.29917.1"; exon_number "2";
5	StringTie	exon	3469353	3469443	1000	+	.	gene_id "MSTRG.29926"; transcript_id "MSTRG.29926.1"; exon_number "1";
5	StringTie	exon	3469541	3469742	1000	+	.	gene_id "MSTRG.29926"; transcript_id "MSTRG.29926.1"; exon_number "2";
5	StringTie	exon	3324889	3326988	1000	-	.	gene_id "MSTRG.29929"; transcript_id "MSTRG.29929.3"; exon_number "1";
5	StringTie	exon	3365099	3365196	1000	-	.	gene_id "MSTRG.29929"; transcript_id "MSTRG.29929.3"; exon_number "2";
5	StringTie	exon	3346659	3354945	1000	-	.	gene_id "MSTRG.29929"; transcript_id "MSTRG.29929.4"; exon_number "1";
5	StringTie	exon	3365099	3365161	1000	-	.	gene_id "MSTRG.29929"; transcript_id "MSTRG.29929.4"; exon_number "2";
5	StringTie	exon	3366254	3366352	1000	-	.	gene_id "MSTRG.29929"; transcript_id "MSTRG.29929.4"; exon_number "3";
5	StringTie	exon	7111716	7111841	1000	+	.	gene_id "MSTRG.30014"; transcript_id "MSTRG.30014.1"; exon_number "1";
5	StringTie	exon	7117058	7117164	1000	+	.	gene_id "MSTRG.30014"; transcript_id "MSTRG.30014.1"; exon_number "2";
5	StringTie	exon	7118255	7122582	1000	+	.	gene_id "MSTRG.30014"; transcript_id "MSTRG.30014.1"; exon_number "3";
5	StringTie	exon	8971984	8972147	1000	-	.	gene_id "MSTRG.30052"; transcript_id "MSTRG.30052.1"; exon_number "1";
5	StringTie	exon	8975770	8975829	1000	-	.	gene_id "MSTRG.30052"; transcript_id "MSTRG.30052.1"; exon_number "2";
5	StringTie	exon	11911126	11911746	1000	-	.	gene_id "MSTRG.30174"; transcript_id "MSTRG.30174.1"; exon_number "1";
5	StringTie	exon	11912672	11913250	1000	-	.	gene_id "MSTRG.30174"; transcript_id "MSTRG.30174.1"; exon_number "2";
5	StringTie	exon	14057306	14057321	1000	-	.	gene_id "MSTRG.30213"; transcript_id "MSTRG.30213.1"; exon_number "1";
5	StringTie	exon	14059391	14059530	1000	-	.	gene_id "MSTRG.30213"; transcript_id "MSTRG.30213.1"; exon_number "2";
5	StringTie	exon	14061205	14061289	1000	-	.	gene_id "MSTRG.30213"; transcript_id "MSTRG.30213.1"; exon_number "3";
5	StringTie	exon	19211294	19212053	1000	-	.	gene_id "MSTRG.30414"; transcript_id "MSTRG.30414.1"; exon_number "1";
5	StringTie	exon	19212489	19212974	1000	-	.	gene_id "MSTRG.30414"; transcript_id "MSTRG.30414.1"; exon_number "2";
5	StringTie	exon	19211913	19212053	1000	-	.	gene_id "MSTRG.30414"; transcript_id "MSTRG.30414.2"; exon_number "1";
5	StringTie	exon	19212357	19212840	1000	-	.	gene_id "MSTRG.30414"; transcript_id "MSTRG.30414.2"; exon_number "2";
5	StringTie	exon	19218182	19218867	1000	-	.	gene_id "MSTRG.30416"; transcript_id "MSTRG.30416.1"; exon_number "1";
5	StringTie	exon	19219285	19222016	1000	-	.	gene_id "MSTRG.30416"; transcript_id "MSTRG.30416.1"; exon_number "2";
5	StringTie	exon	19807781	19807913	1000	-	.	gene_id "MSTRG.30455"; transcript_id "MSTRG.30455.1"; exon_number "1";
5	StringTie	exon	19808380	19808469	1000	-	.	gene_id "MSTRG.30455"; transcript_id "MSTRG.30455.1"; exon_number "2";
5	StringTie	exon	19808844	19808951	1000	-	.	gene_id "MSTRG.30455"; transcript_id "MSTRG.30455.1"; exon_number "3";
5	StringTie	exon	19810078	19810116	1000	-	.	gene_id "MSTRG.30455"; transcript_id "MSTRG.30455.1"; exon_number "4";
5	StringTie	exon	19811817	19811926	1000	-	.	gene_id "MSTRG.30455"; transcript_id "MSTRG.30455.1"; exon_number "5";
5	StringTie	exon	21471828	21473520	1000	-	.	gene_id "MSTRG.30495"; transcript_id "MSTRG.30495.1"; exon_number "1";
5	StringTie	exon	21474199	21474580	1000	-	.	gene_id "MSTRG.30495"; transcript_id "MSTRG.30495.1"; exon_number "2";
5	StringTie	exon	29381535	29381578	1000	-	.	gene_id "MSTRG.30700"; transcript_id "MSTRG.30700.1"; exon_number "1";
5	StringTie	exon	29395168	29395481	1000	-	.	gene_id "MSTRG.30700"; transcript_id "MSTRG.30700.1"; exon_number "2";
5	StringTie	exon	36219909	36220030	1000	-	.	gene_id "MSTRG.30952"; transcript_id "MSTRG.30952.1"; exon_number "1";
5	StringTie	exon	36230123	36230992	1000	-	.	gene_id "MSTRG.30952"; transcript_id "MSTRG.30952.1"; exon_number "2";
5	StringTie	exon	42299643	42299923	1000	+	.	gene_id "MSTRG.31019"; transcript_id "MSTRG.31019.1"; exon_number "1";
5	StringTie	exon	42308951	42309037	1000	+	.	gene_id "MSTRG.31019"; transcript_id "MSTRG.31019.1"; exon_number "2";
5	StringTie	exon	42313674	42314210	1000	+	.	gene_id "MSTRG.31019"; transcript_id "MSTRG.31019.1"; exon_number "3";
5	StringTie	exon	61083845	61084067	1000	-	.	gene_id "MSTRG.31416"; transcript_id "MSTRG.31416.1"; exon_number "1";
5	StringTie	exon	61085370	61086617	1000	-	.	gene_id "MSTRG.31416"; transcript_id "MSTRG.31416.1"; exon_number "2";
5	StringTie	exon	64378737	64378925	1000	+	.	gene_id "MSTRG.31569"; transcript_id "MSTRG.31569.2"; exon_number "1";
5	StringTie	exon	64394687	64394861	1000	+	.	gene_id "MSTRG.31569"; transcript_id "MSTRG.31569.2"; exon_number "2";
5	StringTie	exon	64400043	64400124	1000	+	.	gene_id "MSTRG.31569"; transcript_id "MSTRG.31569.2"; exon_number "3";
5	StringTie	exon	64411405	64411708	1000	+	.	gene_id "MSTRG.31569"; transcript_id "MSTRG.31569.2"; exon_number "4";
5	StringTie	exon	66328091	66328153	1000	+	.	gene_id "MSTRG.31599"; transcript_id "MSTRG.31599.1"; exon_number "1";
5	StringTie	exon	66334725	66334879	1000	+	.	gene_id "MSTRG.31599"; transcript_id "MSTRG.31599.1"; exon_number "2";
5	StringTie	exon	67917865	67918234	1000	+	.	gene_id "MSTRG.31658"; transcript_id "MSTRG.31658.1"; exon_number "1";
5	StringTie	exon	67918732	67918974	1000	+	.	gene_id "MSTRG.31658"; transcript_id "MSTRG.31658.1"; exon_number "2";
5	StringTie	exon	77186590	77186751	1000	-	.	gene_id "MSTRG.31845"; transcript_id "MSTRG.31845.1"; exon_number "1";
5	StringTie	exon	77187940	77187985	1000	-	.	gene_id "MSTRG.31845"; transcript_id "MSTRG.31845.1"; exon_number "2";
5	StringTie	exon	77064464	77066738	1000	-	.	gene_id "MSTRG.31850"; transcript_id "MSTRG.31850.1"; exon_number "1";
5	StringTie	exon	77066781	77067753	1000	-	.	gene_id "MSTRG.31850"; transcript_id "MSTRG.31850.1"; exon_number "2";
5	StringTie	exon	86687208	86687471	1000	-	.	gene_id "MSTRG.32071"; transcript_id "MSTRG.32071.1"; exon_number "1";
5	StringTie	exon	86688217	86688410	1000	-	.	gene_id "MSTRG.32071"; transcript_id "MSTRG.32071.1"; exon_number "2";
5	StringTie	exon	88418404	88419677	1000	-	.	gene_id "MSTRG.32121"; transcript_id "MSTRG.32121.1"; exon_number "1";
5	StringTie	exon	88424475	88424638	1000	-	.	gene_id "MSTRG.32121"; transcript_id "MSTRG.32121.1"; exon_number "2";
5	StringTie	exon	90506164	90507382	1000	-	.	gene_id "MSTRG.32206"; transcript_id "MSTRG.32206.1"; exon_number "1";
5	StringTie	exon	90515733	90515804	1000	-	.	gene_id "MSTRG.32206"; transcript_id "MSTRG.32206.1"; exon_number "2";
5	StringTie	exon	100456803	100457404	1000	+	.	gene_id "MSTRG.32284"; transcript_id "MSTRG.32284.1"; exon_number "1";
5	StringTie	exon	100457791	100458102	1000	+	.	gene_id "MSTRG.32284"; transcript_id "MSTRG.32284.1"; exon_number "2";
6	StringTie	exon	1489353	1489665	1000	-	.	gene_id "MSTRG.32431"; transcript_id "MSTRG.32431.1"; exon_number "1";
6	StringTie	exon	1490054	1490251	1000	-	.	gene_id "MSTRG.32431"; transcript_id "MSTRG.32431.1"; exon_number "2";
6	StringTie	exon	4659269	4659906	1000	-	.	gene_id "MSTRG.32503"; transcript_id "MSTRG.32503.2"; exon_number "1";
6	StringTie	exon	4660219	4660434	1000	-	.	gene_id "MSTRG.32503"; transcript_id "MSTRG.32503.2"; exon_number "2";
6	StringTie	exon	8455017	8455048	1000	+	.	gene_id "MSTRG.32577"; transcript_id "MSTRG.32577.1"; exon_number "1";
6	StringTie	exon	8466311	8466701	1000	+	.	gene_id "MSTRG.32577"; transcript_id "MSTRG.32577.1"; exon_number "2";
6	StringTie	exon	8463712	8463757	1000	-	.	gene_id "MSTRG.32578"; transcript_id "MSTRG.32578.1"; exon_number "1";
6	StringTie	exon	8466369	8466701	1000	-	.	gene_id "MSTRG.32578"; transcript_id "MSTRG.32578.1"; exon_number "2";
6	StringTie	exon	13173794	13173994	1000	-	.	gene_id "MSTRG.32664"; transcript_id "MSTRG.32664.1"; exon_number "1";
6	StringTie	exon	13174246	13174297	1000	-	.	gene_id "MSTRG.32664"; transcript_id "MSTRG.32664.1"; exon_number "2";
6	StringTie	exon	17674055	17677313	1000	+	.	gene_id "MSTRG.32776"; transcript_id "MSTRG.32776.1"; exon_number "1";
6	StringTie	exon	17678623	17680137	1000	+	.	gene_id "MSTRG.32776"; transcript_id "MSTRG.32776.1"; exon_number "2";
6	StringTie	exon	20453713	20453776	1000	+	.	gene_id "MSTRG.32831"; transcript_id "MSTRG.32831.1"; exon_number "1";
6	StringTie	exon	20461387	20461471	1000	+	.	gene_id "MSTRG.32831"; transcript_id "MSTRG.32831.1"; exon_number "2";
6	StringTie	exon	20559226	20559289	1000	+	.	gene_id "MSTRG.32831"; transcript_id "MSTRG.32831.1"; exon_number "3";
6	StringTie	exon	21280124	21280297	1000	-	.	gene_id "MSTRG.32844"; transcript_id "MSTRG.32844.1"; exon_number "1";
6	StringTie	exon	21280336	21280907	1000	-	.	gene_id "MSTRG.32844"; transcript_id "MSTRG.32844.1"; exon_number "2";
6	StringTie	exon	30516947	30517025	1000	+	.	gene_id "MSTRG.32975"; transcript_id "MSTRG.32975.1"; exon_number "1";
6	StringTie	exon	30522046	30522111	1000	+	.	gene_id "MSTRG.32975"; transcript_id "MSTRG.32975.1"; exon_number "2";
6	StringTie	exon	30531892	30532031	1000	+	.	gene_id "MSTRG.32975"; transcript_id "MSTRG.32975.1"; exon_number "3";
6	StringTie	exon	30533886	30533990	1000	+	.	gene_id "MSTRG.32975"; transcript_id "MSTRG.32975.1"; exon_number "4";
6	StringTie	exon	30561124	30561264	1000	+	.	gene_id "MSTRG.32975"; transcript_id "MSTRG.32975.1"; exon_number "5";
6	StringTie	exon	30563128	30563345	1000	+	.	gene_id "MSTRG.32975"; transcript_id "MSTRG.32975.1"; exon_number "6";
6	StringTie	exon	30563569	30563615	1000	+	.	gene_id "MSTRG.32975"; transcript_id "MSTRG.32975.1"; exon_number "7";
6	StringTie	exon	30568053	30568104	1000	+	.	gene_id "MSTRG.32975"; transcript_id "MSTRG.32975.1"; exon_number "8";
6	StringTie	exon	30552601	30552829	1000	+	.	gene_id "MSTRG.32975"; transcript_id "MSTRG.32975.2"; exon_number "1";
6	StringTie	exon	30561124	30561264	1000	+	.	gene_id "MSTRG.32975"; transcript_id "MSTRG.32975.2"; exon_number "2";
6	StringTie	exon	30563128	30563345	1000	+	.	gene_id "MSTRG.32975"; transcript_id "MSTRG.32975.2"; exon_number "3";
6	StringTie	exon	30563569	30563615	1000	+	.	gene_id "MSTRG.32975"; transcript_id "MSTRG.32975.2"; exon_number "4";
6	StringTie	exon	30568053	30568110	1000	+	.	gene_id "MSTRG.32975"; transcript_id "MSTRG.32975.2"; exon_number "5";
6	StringTie	exon	30568376	30568505	1000	+	.	gene_id "MSTRG.32975"; transcript_id "MSTRG.32975.2"; exon_number "6";
6	StringTie	exon	30570645	30571094	1000	+	.	gene_id "MSTRG.32975"; transcript_id "MSTRG.32975.2"; exon_number "7";
6	StringTie	exon	31703464	31703749	1000	-	.	gene_id "MSTRG.32981"; transcript_id "MSTRG.32981.1"; exon_number "1";
6	StringTie	exon	31705186	31705414	1000	-	.	gene_id "MSTRG.32981"; transcript_id "MSTRG.32981.1"; exon_number "2";
6	StringTie	exon	33388802	33389003	1000	-	.	gene_id "MSTRG.33009"; transcript_id "MSTRG.33009.1"; exon_number "1";
6	StringTie	exon	33415725	33415795	1000	-	.	gene_id "MSTRG.33009"; transcript_id "MSTRG.33009.1"; exon_number "2";
6	StringTie	exon	33428628	33428779	1000	-	.	gene_id "MSTRG.33009"; transcript_id "MSTRG.33009.1"; exon_number "3";
6	StringTie	exon	33435833	33436034	1000	-	.	gene_id "MSTRG.33009"; transcript_id "MSTRG.33009.1"; exon_number "4";
6	StringTie	exon	41408753	41409901	1000	+	.	gene_id "MSTRG.33118"; transcript_id "MSTRG.33118.1"; exon_number "1";
6	StringTie	exon	41410028	41412347	1000	+	.	gene_id "MSTRG.33118"; transcript_id "MSTRG.33118.1"; exon_number "2";
6	StringTie	exon	48862917	48865890	1000	-	.	gene_id "MSTRG.33443"; transcript_id "MSTRG.33443.1"; exon_number "1";
6	StringTie	exon	48866597	48866687	1000	-	.	gene_id "MSTRG.33443"; transcript_id "MSTRG.33443.1"; exon_number "2";
6	StringTie	exon	50766368	50766847	1000	-	.	gene_id "MSTRG.33571"; transcript_id "MSTRG.33571.1"; exon_number "1";
6	StringTie	exon	50772519	50772672	1000	-	.	gene_id "MSTRG.33571"; transcript_id "MSTRG.33571.1"; exon_number "2";
6	StringTie	exon	51597857	51598112	1000	-	.	gene_id "MSTRG.33620"; transcript_id "MSTRG.33620.1"; exon_number "1";
6	StringTie	exon	51605594	51605900	1000	-	.	gene_id "MSTRG.33620"; transcript_id "MSTRG.33620.1"; exon_number "2";
6	StringTie	exon	52211677	52211838	1000	-	.	gene_id "MSTRG.33661"; transcript_id "MSTRG.33661.1"; exon_number "1";
6	StringTie	exon	52212114	52212215	1000	-	.	gene_id "MSTRG.33661"; transcript_id "MSTRG.33661.1"; exon_number "2";
6	StringTie	exon	53339208	53339232	1000	+	.	gene_id "MSTRG.33707"; transcript_id "MSTRG.33707.1"; exon_number "1";
6	StringTie	exon	53391931	53392192	1000	+	.	gene_id "MSTRG.33707"; transcript_id "MSTRG.33707.1"; exon_number "2";
6	StringTie	exon	53367105	53367731	1000	+	.	gene_id "MSTRG.33711"; transcript_id "MSTRG.33711.1"; exon_number "1";
6	StringTie	exon	53369605	53369878	1000	+	.	gene_id "MSTRG.33711"; transcript_id "MSTRG.33711.1"; exon_number "2";
6	StringTie	exon	53556252	53556745	1000	+	.	gene_id "MSTRG.33728"; transcript_id "MSTRG.33728.1"; exon_number "1";
6	StringTie	exon	53563516	53564916	1000	+	.	gene_id "MSTRG.33728"; transcript_id "MSTRG.33728.1"; exon_number "2";
6	StringTie	exon	58292131	58292178	1000	-	.	gene_id "MSTRG.33968"; transcript_id "MSTRG.33968.1"; exon_number "1";
6	StringTie	exon	58295064	58295179	1000	-	.	gene_id "MSTRG.33968"; transcript_id "MSTRG.33968.1"; exon_number "2";
6	StringTie	exon	58295859	58296005	1000	-	.	gene_id "MSTRG.33968"; transcript_id "MSTRG.33968.1"; exon_number "3";
6	StringTie	exon	59571967	59574420	1000	-	.	gene_id "MSTRG.34015"; transcript_id "MSTRG.34015.1"; exon_number "1";
6	StringTie	exon	59580577	59581669	1000	-	.	gene_id "MSTRG.34015"; transcript_id "MSTRG.34015.1"; exon_number "2";
6	StringTie	exon	64326369	64326479	1000	+	.	gene_id "MSTRG.34211"; transcript_id "MSTRG.34211.1"; exon_number "1";
6	StringTie	exon	64327828	64327957	1000	+	.	gene_id "MSTRG.34211"; transcript_id "MSTRG.34211.1"; exon_number "2";
6	StringTie	exon	68652713	68652755	1000	+	.	gene_id "MSTRG.34386"; transcript_id "MSTRG.34386.1"; exon_number "1";
6	StringTie	exon	68663765	68663975	1000	+	.	gene_id "MSTRG.34386"; transcript_id "MSTRG.34386.1"; exon_number "2";
6	StringTie	exon	79303313	79304610	1000	+	.	gene_id "MSTRG.34572"; transcript_id "MSTRG.34572.1"; exon_number "1";
6	StringTie	exon	79323994	79324048	1000	+	.	gene_id "MSTRG.34572"; transcript_id "MSTRG.34572.1"; exon_number "2";
6	StringTie	exon	84697864	84697963	1000	+	.	gene_id "MSTRG.34776"; transcript_id "MSTRG.34776.1"; exon_number "1";
6	StringTie	exon	84706200	84706375	1000	+	.	gene_id "MSTRG.34776"; transcript_id "MSTRG.34776.1"; exon_number "2";
6	StringTie	exon	89320140	89320277	1000	-	.	gene_id "MSTRG.34904"; transcript_id "MSTRG.34904.1"; exon_number "1";
6	StringTie	exon	89327769	89328132	1000	-	.	gene_id "MSTRG.34904"; transcript_id "MSTRG.34904.1"; exon_number "2";
6	StringTie	exon	89328394	89328531	1000	-	.	gene_id "MSTRG.34904"; transcript_id "MSTRG.34904.1"; exon_number "3";
6	StringTie	exon	93533407	93533701	1000	-	.	gene_id "MSTRG.35006"; transcript_id "MSTRG.35006.1"; exon_number "1";
6	StringTie	exon	93536923	93537347	1000	-	.	gene_id "MSTRG.35006"; transcript_id "MSTRG.35006.1"; exon_number "2";
6	StringTie	exon	95708782	95708831	1000	+	.	gene_id "MSTRG.35105"; transcript_id "MSTRG.35105.1"; exon_number "1";
6	StringTie	exon	95709761	95710020	1000	+	.	gene_id "MSTRG.35105"; transcript_id "MSTRG.35105.1"; exon_number "2";
6	StringTie	exon	98451707	98452122	1000	+	.	gene_id "MSTRG.35179"; transcript_id "MSTRG.35179.1"; exon_number "1";
6	StringTie	exon	98457044	98457543	1000	+	.	gene_id "MSTRG.35179"; transcript_id "MSTRG.35179.1"; exon_number "2";
6	StringTie	exon	115459229	115459762	1000	+	.	gene_id "MSTRG.35396"; transcript_id "MSTRG.35396.1"; exon_number "1";
6	StringTie	exon	115460597	115460849	1000	+	.	gene_id "MSTRG.35396"; transcript_id "MSTRG.35396.1"; exon_number "2";
6	StringTie	exon	131653961	131654378	1000	-	.	gene_id "MSTRG.35585"; transcript_id "MSTRG.35585.1"; exon_number "1";
6	StringTie	exon	131661998	131662097	1000	-	.	gene_id "MSTRG.35585"; transcript_id "MSTRG.35585.1"; exon_number "2";
6	StringTie	exon	131653961	131654378	1000	-	.	gene_id "MSTRG.35585"; transcript_id "MSTRG.35585.2"; exon_number "1";
6	StringTie	exon	131659266	131659323	1000	-	.	gene_id "MSTRG.35585"; transcript_id "MSTRG.35585.2"; exon_number "2";
6	StringTie	exon	131661998	131662097	1000	-	.	gene_id "MSTRG.35585"; transcript_id "MSTRG.35585.2"; exon_number "3";
6	StringTie	exon	131653961	131654378	1000	-	.	gene_id "MSTRG.35585"; transcript_id "MSTRG.35585.3"; exon_number "1";
6	StringTie	exon	131670257	131670408	1000	-	.	gene_id "MSTRG.35585"; transcript_id "MSTRG.35585.3"; exon_number "2";
6	StringTie	exon	137483028	137483054	1000	-	.	gene_id "MSTRG.35647"; transcript_id "MSTRG.35647.1"; exon_number "1";
6	StringTie	exon	137489447	137489628	1000	-	.	gene_id "MSTRG.35647"; transcript_id "MSTRG.35647.1"; exon_number "2";
6	StringTie	exon	153213930	153213992	1000	+	.	gene_id "MSTRG.35876"; transcript_id "MSTRG.35876.1"; exon_number "1";
6	StringTie	exon	153317334	153317549	1000	+	.	gene_id "MSTRG.35876"; transcript_id "MSTRG.35876.1"; exon_number "2";
6	StringTie	exon	153321950	153322013	1000	+	.	gene_id "MSTRG.35876"; transcript_id "MSTRG.35876.1"; exon_number "3";
6	StringTie	exon	157845707	157845952	1000	-	.	gene_id "MSTRG.35950"; transcript_id "MSTRG.35950.1"; exon_number "1";
6	StringTie	exon	157846185	157846632	1000	-	.	gene_id "MSTRG.35950"; transcript_id "MSTRG.35950.1"; exon_number "2";
6	StringTie	exon	164968085	164968212	1000	+	.	gene_id "MSTRG.36114"; transcript_id "MSTRG.36114.2"; exon_number "1";
6	StringTie	exon	164968917	164968998	1000	+	.	gene_id "MSTRG.36114"; transcript_id "MSTRG.36114.2"; exon_number "2";
6	StringTie	exon	164969155	164970183	1000	+	.	gene_id "MSTRG.36114"; transcript_id "MSTRG.36114.2"; exon_number "3";
6	StringTie	exon	167217425	167218034	1000	-	.	gene_id "MSTRG.36191"; transcript_id "MSTRG.36191.1"; exon_number "1";
6	StringTie	exon	167218420	167218492	1000	-	.	gene_id "MSTRG.36191"; transcript_id "MSTRG.36191.1"; exon_number "2";
6	StringTie	exon	167233537	167233886	1000	-	.	gene_id "MSTRG.36191"; transcript_id "MSTRG.36191.1"; exon_number "3";
6	StringTie	exon	167217425	167218034	1000	-	.	gene_id "MSTRG.36191"; transcript_id "MSTRG.36191.2"; exon_number "1";
6	StringTie	exon	167233537	167233886	1000	-	.	gene_id "MSTRG.36191"; transcript_id "MSTRG.36191.2"; exon_number "2";
6	StringTie	exon	167873422	167873646	1000	+	.	gene_id "MSTRG.36231"; transcript_id "MSTRG.36231.2"; exon_number "1";
6	StringTie	exon	167880076	167881067	1000	+	.	gene_id "MSTRG.36231"; transcript_id "MSTRG.36231.2"; exon_number "2";
6	StringTie	exon	169216233	169216681	1000	-	.	gene_id "MSTRG.36245"; transcript_id "MSTRG.36245.1"; exon_number "1";
6	StringTie	exon	169220489	169221338	1000	-	.	gene_id "MSTRG.36245"; transcript_id "MSTRG.36245.1"; exon_number "2";
6	StringTie	exon	168534737	168534852	1000	-	.	gene_id "MSTRG.36301"; transcript_id "MSTRG.36301.1"; exon_number "1";
6	StringTie	exon	168535400	168535642	1000	-	.	gene_id "MSTRG.36301"; transcript_id "MSTRG.36301.1"; exon_number "2";
7	StringTie	exon	21124	21492	1000	-	.	gene_id "MSTRG.36333"; transcript_id "MSTRG.36333.2"; exon_number "1";
7	StringTie	exon	29739	29770	1000	-	.	gene_id "MSTRG.36333"; transcript_id "MSTRG.36333.2"; exon_number "2";
7	StringTie	exon	32283	32575	1000	-	.	gene_id "MSTRG.36333"; transcript_id "MSTRG.36333.3"; exon_number "1";
7	StringTie	exon	35216	35323	1000	-	.	gene_id "MSTRG.36333"; transcript_id "MSTRG.36333.3"; exon_number "2";
7	StringTie	exon	39549	39623	1000	-	.	gene_id "MSTRG.36333"; transcript_id "MSTRG.36333.3"; exon_number "3";
7	StringTie	exon	553940	555206	1000	-	.	gene_id "MSTRG.36336"; transcript_id "MSTRG.36336.1"; exon_number "1";
7	StringTie	exon	556008	556151	1000	-	.	gene_id "MSTRG.36336"; transcript_id "MSTRG.36336.1"; exon_number "2";
7	StringTie	exon	556909	556979	1000	-	.	gene_id "MSTRG.36336"; transcript_id "MSTRG.36336.1"; exon_number "3";
7	StringTie	exon	2150046	2150259	1000	+	.	gene_id "MSTRG.36357"; transcript_id "MSTRG.36357.1"; exon_number "1";
7	StringTie	exon	2150536	2150654	1000	+	.	gene_id "MSTRG.36357"; transcript_id "MSTRG.36357.1"; exon_number "2";
7	StringTie	exon	2153262	2153390	1000	+	.	gene_id "MSTRG.36357"; transcript_id "MSTRG.36357.1"; exon_number "3";
7	StringTie	exon	2153491	2154849	1000	+	.	gene_id "MSTRG.36357"; transcript_id "MSTRG.36357.1"; exon_number "4";
7	StringTie	exon	2153151	2153390	1000	+	.	gene_id "MSTRG.36357"; transcript_id "MSTRG.36357.2"; exon_number "1";
7	StringTie	exon	2153954	2154719	1000	+	.	gene_id "MSTRG.36357"; transcript_id "MSTRG.36357.2"; exon_number "2";
7	StringTie	exon	4389474	4389664	1000	-	.	gene_id "MSTRG.36386"; transcript_id "MSTRG.36386.1"; exon_number "1";
7	StringTie	exon	4390562	4390731	1000	-	.	gene_id "MSTRG.36386"; transcript_id "MSTRG.36386.1"; exon_number "2";
7	StringTie	exon	4393348	4393521	1000	-	.	gene_id "MSTRG.36386"; transcript_id "MSTRG.36386.1"; exon_number "3";
7	StringTie	exon	4443775	4443805	1000	+	.	gene_id "MSTRG.36394"; transcript_id "MSTRG.36394.1"; exon_number "1";
7	StringTie	exon	4478446	4479526	1000	+	.	gene_id "MSTRG.36394"; transcript_id "MSTRG.36394.1"; exon_number "2";
7	StringTie	exon	4512316	4512574	1000	+	.	gene_id "MSTRG.36413"; transcript_id "MSTRG.36413.1"; exon_number "1";
7	StringTie	exon	4574943	4575060	1000	+	.	gene_id "MSTRG.36413"; transcript_id "MSTRG.36413.1"; exon_number "2";
7	StringTie	exon	4578332	4578458	1000	+	.	gene_id "MSTRG.36413"; transcript_id "MSTRG.36413.1"; exon_number "3";
7	StringTie	exon	4691367	4691395	1000	+	.	gene_id "MSTRG.36426"; transcript_id "MSTRG.36426.1"; exon_number "1";
7	StringTie	exon	4694436	4694711	1000	+	.	gene_id "MSTRG.36426"; transcript_id "MSTRG.36426.1"; exon_number "2";
7	StringTie	exon	5888840	5889837	1000	+	.	gene_id "MSTRG.36449"; transcript_id "MSTRG.36449.1"; exon_number "1";
7	StringTie	exon	5895152	5895762	1000	+	.	gene_id "MSTRG.36449"; transcript_id "MSTRG.36449.1"; exon_number "2";
7	StringTie	exon	17028559	17028990	1000	-	.	gene_id "MSTRG.36613"; transcript_id "MSTRG.36613.1"; exon_number "1";
7	StringTie	exon	17056043	17056072	1000	-	.	gene_id "MSTRG.36613"; transcript_id "MSTRG.36613.1"; exon_number "2";
7	StringTie	exon	17513205	17513369	1000	+	.	gene_id "MSTRG.36669"; transcript_id "MSTRG.36669.1"; exon_number "1";
7	StringTie	exon	17519383	17519702	1000	+	.	gene_id "MSTRG.36669"; transcript_id "MSTRG.36669.1"; exon_number "2";
7	StringTie	exon	20698823	20698853	1000	+	.	gene_id "MSTRG.36873"; transcript_id "MSTRG.36873.1"; exon_number "1";
7	StringTie	exon	20703383	20704019	1000	+	.	gene_id "MSTRG.36873"; transcript_id "MSTRG.36873.1"; exon_number "2";
7	StringTie	exon	32738838	32739028	1000	+	.	gene_id "MSTRG.37277"; transcript_id "MSTRG.37277.1"; exon_number "1";
7	StringTie	exon	32752277	32752399	1000	+	.	gene_id "MSTRG.37277"; transcript_id "MSTRG.37277.1"; exon_number "2";
7	StringTie	exon	32755102	32755466	1000	+	.	gene_id "MSTRG.37277"; transcript_id "MSTRG.37277.1"; exon_number "3";
7	StringTie	exon	34122739	34122874	1000	+	.	gene_id "MSTRG.37317"; transcript_id "MSTRG.37317.2"; exon_number "1";
7	StringTie	exon	34125200	34125310	1000	+	.	gene_id "MSTRG.37317"; transcript_id "MSTRG.37317.2"; exon_number "2";
7	StringTie	exon	34126262	34126336	1000	+	.	gene_id "MSTRG.37317"; transcript_id "MSTRG.37317.2"; exon_number "3";
7	StringTie	exon	34129058	34129198	1000	+	.	gene_id "MSTRG.37317"; transcript_id "MSTRG.37317.2"; exon_number "4";
7	StringTie	exon	34130513	34130702	1000	+	.	gene_id "MSTRG.37317"; transcript_id "MSTRG.37317.2"; exon_number "5";
7	StringTie	exon	34123331	34123476	1000	+	.	gene_id "MSTRG.37317"; transcript_id "MSTRG.37317.3"; exon_number "1";
7	StringTie	exon	34125200	34125310	1000	+	.	gene_id "MSTRG.37317"; transcript_id "MSTRG.37317.3"; exon_number "2";
7	StringTie	exon	34126262	34126336	1000	+	.	gene_id "MSTRG.37317"; transcript_id "MSTRG.37317.3"; exon_number "3";
7	StringTie	exon	34129058	34129198	1000	+	.	gene_id "MSTRG.37317"; transcript_id "MSTRG.37317.3"; exon_number "4";
7	StringTie	exon	34130521	34130849	1000	+	.	gene_id "MSTRG.37317"; transcript_id "MSTRG.37317.3"; exon_number "5";
7	StringTie	exon	42162075	42162440	1000	-	.	gene_id "MSTRG.37503"; transcript_id "MSTRG.37503.1"; exon_number "1";
7	StringTie	exon	42181070	42181216	1000	-	.	gene_id "MSTRG.37503"; transcript_id "MSTRG.37503.1"; exon_number "2";
7	StringTie	exon	42166693	42167279	1000	-	.	gene_id "MSTRG.37503"; transcript_id "MSTRG.37503.2"; exon_number "1";
7	StringTie	exon	42167965	42168079	1000	-	.	gene_id "MSTRG.37503"; transcript_id "MSTRG.37503.2"; exon_number "2";
7	StringTie	exon	42181070	42181148	1000	-	.	gene_id "MSTRG.37503"; transcript_id "MSTRG.37503.2"; exon_number "3";
7	StringTie	exon	42176813	42177388	1000	-	.	gene_id "MSTRG.37503"; transcript_id "MSTRG.37503.3"; exon_number "1";
7	StringTie	exon	42181070	42181148	1000	-	.	gene_id "MSTRG.37503"; transcript_id "MSTRG.37503.3"; exon_number "2";
7	StringTie	exon	53906043	53906771	1000	+	.	gene_id "MSTRG.37757"; transcript_id "MSTRG.37757.1"; exon_number "1";
7	StringTie	exon	53907424	53907693	1000	+	.	gene_id "MSTRG.37757"; transcript_id "MSTRG.37757.1"; exon_number "2";
7	StringTie	exon	59450388	59450595	1000	+	.	gene_id "MSTRG.37933"; transcript_id "MSTRG.37933.1"; exon_number "1";
7	StringTie	exon	59451687	59451736	1000	+	.	gene_id "MSTRG.37933"; transcript_id "MSTRG.37933.1"; exon_number "2";
7	StringTie	exon	59575071	59575458	1000	-	.	gene_id "MSTRG.37937"; transcript_id "MSTRG.37937.1"; exon_number "1";
7	StringTie	exon	59584300	59584409	1000	-	.	gene_id "MSTRG.37937"; transcript_id "MSTRG.37937.1"; exon_number "2";
7	StringTie	exon	59584715	59584795	1000	-	.	gene_id "MSTRG.37937"; transcript_id "MSTRG.37937.1"; exon_number "3";
7	StringTie	exon	74980882	74980929	1000	-	.	gene_id "MSTRG.38217"; transcript_id "MSTRG.38217.1"; exon_number "1";
7	StringTie	exon	74981913	74982160	1000	-	.	gene_id "MSTRG.38217"; transcript_id "MSTRG.38217.1"; exon_number "2";
7	StringTie	exon	74982498	74982731	1000	-	.	gene_id "MSTRG.38217"; transcript_id "MSTRG.38217.1"; exon_number "3";
7	StringTie	exon	86110011	86110331	1000	-	.	gene_id "MSTRG.38429"; transcript_id "MSTRG.38429.2"; exon_number "1";
7	StringTie	exon	86115841	86115893	1000	-	.	gene_id "MSTRG.38429"; transcript_id "MSTRG.38429.2"; exon_number "2";
7	StringTie	exon	86121038	86121122	1000	-	.	gene_id "MSTRG.38429"; transcript_id "MSTRG.38429.2"; exon_number "3";
7	StringTie	exon	86121693	86121761	1000	-	.	gene_id "MSTRG.38429"; transcript_id "MSTRG.38429.2"; exon_number "4";
7	StringTie	exon	86123750	86123812	1000	-	.	gene_id "MSTRG.38429"; transcript_id "MSTRG.38429.2"; exon_number "5";
7	StringTie	exon	90288932	90290240	1000	-	.	gene_id "MSTRG.38477"; transcript_id "MSTRG.38477.1"; exon_number "1";
7	StringTie	exon	90309515	90309830	1000	-	.	gene_id "MSTRG.38477"; transcript_id "MSTRG.38477.1"; exon_number "2";
7	StringTie	exon	90289142	90290240	1000	-	.	gene_id "MSTRG.38477"; transcript_id "MSTRG.38477.2"; exon_number "1";
7	StringTie	exon	90291809	90291878	1000	-	.	gene_id "MSTRG.38477"; transcript_id "MSTRG.38477.2"; exon_number "2";
7	StringTie	exon	89322439	89322573	1000	+	.	gene_id "MSTRG.38483"; transcript_id "MSTRG.38483.1"; exon_number "1";
7	StringTie	exon	89333116	89333251	1000	+	.	gene_id "MSTRG.38483"; transcript_id "MSTRG.38483.1"; exon_number "2";
7	StringTie	exon	99908459	99908989	1000	-	.	gene_id "MSTRG.38797"; transcript_id "MSTRG.38797.1"; exon_number "1";
7	StringTie	exon	99910474	99910848	1000	-	.	gene_id "MSTRG.38797"; transcript_id "MSTRG.38797.1"; exon_number "2";
7	StringTie	exon	100123676	100123819	1000	+	.	gene_id "MSTRG.38803"; transcript_id "MSTRG.38803.2"; exon_number "1";
7	StringTie	exon	100123979	100124682	1000	+	.	gene_id "MSTRG.38803"; transcript_id "MSTRG.38803.2"; exon_number "2";
7	StringTie	exon	104009512	104009801	1000	+	.	gene_id "MSTRG.38847"; transcript_id "MSTRG.38847.1"; exon_number "1";
7	StringTie	exon	104010410	104011119	1000	+	.	gene_id "MSTRG.38847"; transcript_id "MSTRG.38847.1"; exon_number "2";
7	StringTie	exon	104009515	104009596	1000	+	.	gene_id "MSTRG.38847"; transcript_id "MSTRG.38847.2"; exon_number "1";
7	StringTie	exon	104010410	104011194	1000	+	.	gene_id "MSTRG.38847"; transcript_id "MSTRG.38847.2"; exon_number "2";
7	StringTie	exon	115271417	115271448	1000	+	.	gene_id "MSTRG.38948"; transcript_id "MSTRG.38948.1"; exon_number "1";
7	StringTie	exon	115273408	115273466	1000	+	.	gene_id "MSTRG.38948"; transcript_id "MSTRG.38948.1"; exon_number "2";
7	StringTie	exon	115274290	115274418	1000	+	.	gene_id "MSTRG.38948"; transcript_id "MSTRG.38948.1"; exon_number "3";
7	StringTie	exon	115276226	115276777	1000	+	.	gene_id "MSTRG.38948"; transcript_id "MSTRG.38948.1"; exon_number "4";
7	StringTie	exon	115274333	115274418	1000	+	.	gene_id "MSTRG.38948"; transcript_id "MSTRG.38948.2"; exon_number "1";
7	StringTie	exon	115276264	115277071	1000	+	.	gene_id "MSTRG.38948"; transcript_id "MSTRG.38948.2"; exon_number "2";
7	StringTie	exon	121663791	121665980	1000	+	.	gene_id "MSTRG.39033"; transcript_id "MSTRG.39033.1"; exon_number "1";
7	StringTie	exon	121666072	121666209	1000	+	.	gene_id "MSTRG.39033"; transcript_id "MSTRG.39033.1"; exon_number "2";
7	StringTie	exon	121674887	121674962	1000	+	.	gene_id "MSTRG.39034"; transcript_id "MSTRG.39034.1"; exon_number "1";
7	StringTie	exon	121683616	121683799	1000	+	.	gene_id "MSTRG.39034"; transcript_id "MSTRG.39034.1"; exon_number "2";
8	StringTie	exon	356718	357880	1000	-	.	gene_id "MSTRG.39061"; transcript_id "MSTRG.39061.1"; exon_number "1";
8	StringTie	exon	363181	363222	1000	-	.	gene_id "MSTRG.39061"; transcript_id "MSTRG.39061.1"; exon_number "2";
8	StringTie	exon	366031	366123	1000	-	.	gene_id "MSTRG.39061"; transcript_id "MSTRG.39061.1"; exon_number "3";
8	StringTie	exon	366459	366535	1000	-	.	gene_id "MSTRG.39061"; transcript_id "MSTRG.39061.1"; exon_number "4";
8	StringTie	exon	366871	367469	1000	-	.	gene_id "MSTRG.39061"; transcript_id "MSTRG.39061.1"; exon_number "5";
8	StringTie	exon	387296	387607	1000	+	.	gene_id "MSTRG.39064"; transcript_id "MSTRG.39064.1"; exon_number "1";
8	StringTie	exon	387885	388107	1000	+	.	gene_id "MSTRG.39064"; transcript_id "MSTRG.39064.1"; exon_number "2";
8	StringTie	exon	3764932	3765306	1000	-	.	gene_id "MSTRG.39148"; transcript_id "MSTRG.39148.1"; exon_number "1";
8	StringTie	exon	3768365	3768435	1000	-	.	gene_id "MSTRG.39148"; transcript_id "MSTRG.39148.1"; exon_number "2";
8	StringTie	exon	3768815	3768911	1000	-	.	gene_id "MSTRG.39148"; transcript_id "MSTRG.39148.1"; exon_number "3";
8	StringTie	exon	18409604	18410017	1000	+	.	gene_id "MSTRG.39358"; transcript_id "MSTRG.39358.1"; exon_number "1";
8	StringTie	exon	18413524	18414802	1000	+	.	gene_id "MSTRG.39358"; transcript_id "MSTRG.39358.1"; exon_number "2";
8	StringTie	exon	55070441	55070736	1000	-	.	gene_id "MSTRG.39808"; transcript_id "MSTRG.39808.1"; exon_number "1";
8	StringTie	exon	55071790	55071852	1000	-	.	gene_id "MSTRG.39808"; transcript_id "MSTRG.39808.1"; exon_number "2";
8	StringTie	exon	55072816	55073016	1000	-	.	gene_id "MSTRG.39808"; transcript_id "MSTRG.39808.1"; exon_number "3";
8	StringTie	exon	55077044	55077205	1000	-	.	gene_id "MSTRG.39808"; transcript_id "MSTRG.39808.1"; exon_number "4";
8	StringTie	exon	70322594	70322726	1000	-	.	gene_id "MSTRG.39967"; transcript_id "MSTRG.39967.1"; exon_number "1";
8	StringTie	exon	70351109	70351260	1000	-	.	gene_id "MSTRG.39967"; transcript_id "MSTRG.39967.1"; exon_number "2";
8	StringTie	exon	72266456	72268458	1000	-	.	gene_id "MSTRG.40065"; transcript_id "MSTRG.40065.1"; exon_number "1";
8	StringTie	exon	72316853	72316927	1000	-	.	gene_id "MSTRG.40065"; transcript_id "MSTRG.40065.1"; exon_number "2";
8	StringTie	exon	72294467	72295145	1000	+	.	gene_id "MSTRG.40066"; transcript_id "MSTRG.40066.1"; exon_number "1";
8	StringTie	exon	72295170	72295441	1000	+	.	gene_id "MSTRG.40066"; transcript_id "MSTRG.40066.1"; exon_number "2";
8	StringTie	exon	87459413	87460067	1000	-	.	gene_id "MSTRG.40320"; transcript_id "MSTRG.40320.1"; exon_number "1";
8	StringTie	exon	87460710	87460856	1000	-	.	gene_id "MSTRG.40320"; transcript_id "MSTRG.40320.1"; exon_number "2";
8	StringTie	exon	87461001	87461098	1000	-	.	gene_id "MSTRG.40320"; transcript_id "MSTRG.40320.1"; exon_number "3";
8	StringTie	exon	87461190	87461393	1000	-	.	gene_id "MSTRG.40320"; transcript_id "MSTRG.40320.1"; exon_number "4";
8	StringTie	exon	87459413	87460067	1000	-	.	gene_id "MSTRG.40320"; transcript_id "MSTRG.40320.2"; exon_number "1";
8	StringTie	exon	87460710	87460856	1000	-	.	gene_id "MSTRG.40320"; transcript_id "MSTRG.40320.2"; exon_number "2";
8	StringTie	exon	87461001	87461098	1000	-	.	gene_id "MSTRG.40320"; transcript_id "MSTRG.40320.2"; exon_number "3";
8	StringTie	exon	87461195	87461393	1000	-	.	gene_id "MSTRG.40320"; transcript_id "MSTRG.40320.2"; exon_number "4";
8	StringTie	exon	87571305	87571641	1000	+	.	gene_id "MSTRG.40378"; transcript_id "MSTRG.40378.1"; exon_number "1";
8	StringTie	exon	87584914	87586269	1000	+	.	gene_id "MSTRG.40378"; transcript_id "MSTRG.40378.1"; exon_number "2";
8	StringTie	exon	99076892	99076998	1000	+	.	gene_id "MSTRG.40454"; transcript_id "MSTRG.40454.1"; exon_number "1";
8	StringTie	exon	99106061	99106155	1000	+	.	gene_id "MSTRG.40454"; transcript_id "MSTRG.40454.1"; exon_number "2";
8	StringTie	exon	99109475	99109537	1000	+	.	gene_id "MSTRG.40454"; transcript_id "MSTRG.40454.1"; exon_number "3";
8	StringTie	exon	99141995	99144107	1000	+	.	gene_id "MSTRG.40454"; transcript_id "MSTRG.40454.1"; exon_number "4";
8	StringTie	exon	100735323	100735395	1000	+	.	gene_id "MSTRG.40476"; transcript_id "MSTRG.40476.1"; exon_number "1";
8	StringTie	exon	100744789	100745111	1000	+	.	gene_id "MSTRG.40476"; transcript_id "MSTRG.40476.1"; exon_number "2";
8	StringTie	exon	111258779	111259567	1000	-	.	gene_id "MSTRG.40638"; transcript_id "MSTRG.40638.1"; exon_number "1";
8	StringTie	exon	111263855	111264193	1000	-	.	gene_id "MSTRG.40638"; transcript_id "MSTRG.40638.1"; exon_number "2";
8	StringTie	exon	118198082	118200840	1000	-	.	gene_id "MSTRG.40830"; transcript_id "MSTRG.40830.1"; exon_number "1";
8	StringTie	exon	118202631	118202774	1000	-	.	gene_id "MSTRG.40830"; transcript_id "MSTRG.40830.1"; exon_number "2";
8	StringTie	exon	119426222	119426794	1000	-	.	gene_id "MSTRG.40844"; transcript_id "MSTRG.40844.2"; exon_number "1";
8	StringTie	exon	119428353	119428493	1000	-	.	gene_id "MSTRG.40844"; transcript_id "MSTRG.40844.2"; exon_number "2";
8	StringTie	exon	119428780	119428815	1000	-	.	gene_id "MSTRG.40844"; transcript_id "MSTRG.40844.2"; exon_number "3";
8	StringTie	exon	120722200	120722458	1000	-	.	gene_id "MSTRG.40858"; transcript_id "MSTRG.40858.1"; exon_number "1";
8	StringTie	exon	120722700	120722849	1000	-	.	gene_id "MSTRG.40858"; transcript_id "MSTRG.40858.1"; exon_number "2";
8	StringTie	exon	121161604	121162043	1000	+	.	gene_id "MSTRG.40883"; transcript_id "MSTRG.40883.1"; exon_number "1";
8	StringTie	exon	121165963	121166045	1000	+	.	gene_id "MSTRG.40883"; transcript_id "MSTRG.40883.1"; exon_number "2";
8	StringTie	exon	130468144	130468278	1000	+	.	gene_id "MSTRG.41013"; transcript_id "MSTRG.41013.1"; exon_number "1";
8	StringTie	exon	130470334	130471394	1000	+	.	gene_id "MSTRG.41013"; transcript_id "MSTRG.41013.1"; exon_number "2";
9	StringTie	exon	712384	713798	1000	+	.	gene_id "MSTRG.41237"; transcript_id "MSTRG.41237.2"; exon_number "1";
9	StringTie	exon	737090	737150	1000	+	.	gene_id "MSTRG.41237"; transcript_id "MSTRG.41237.2"; exon_number "2";
9	StringTie	exon	8795969	8796145	1000	+	.	gene_id "MSTRG.41419"; transcript_id "MSTRG.41419.1"; exon_number "1";
9	StringTie	exon	8807690	8809331	1000	+	.	gene_id "MSTRG.41419"; transcript_id "MSTRG.41419.1"; exon_number "2";
9	StringTie	exon	17259179	17259660	1000	-	.	gene_id "MSTRG.41561"; transcript_id "MSTRG.41561.1"; exon_number "1";
9	StringTie	exon	17266737	17266917	1000	-	.	gene_id "MSTRG.41561"; transcript_id "MSTRG.41561.1"; exon_number "2";
9	StringTie	exon	20034300	20034641	1000	+	.	gene_id "MSTRG.41650"; transcript_id "MSTRG.41650.1"; exon_number "1";
9	StringTie	exon	20036261	20036551	1000	+	.	gene_id "MSTRG.41650"; transcript_id "MSTRG.41650.1"; exon_number "2";
9	StringTie	exon	34086444	34086584	1000	+	.	gene_id "MSTRG.41857"; transcript_id "MSTRG.41857.1"; exon_number "1";
9	StringTie	exon	34097458	34097749	1000	+	.	gene_id "MSTRG.41857"; transcript_id "MSTRG.41857.1"; exon_number "2";
9	StringTie	exon	41633199	41633342	1000	-	.	gene_id "MSTRG.42018"; transcript_id "MSTRG.42018.1"; exon_number "1";
9	StringTie	exon	41636157	41636225	1000	-	.	gene_id "MSTRG.42018"; transcript_id "MSTRG.42018.1"; exon_number "2";
9	StringTie	exon	41638166	41638329	1000	-	.	gene_id "MSTRG.42018"; transcript_id "MSTRG.42018.1"; exon_number "3";
9	StringTie	exon	42021282	42021601	1000	+	.	gene_id "MSTRG.42047"; transcript_id "MSTRG.42047.1"; exon_number "1";
9	StringTie	exon	42022788	42026984	1000	+	.	gene_id "MSTRG.42047"; transcript_id "MSTRG.42047.1"; exon_number "2";
9	StringTie	exon	46637593	46637750	1000	+	.	gene_id "MSTRG.42133"; transcript_id "MSTRG.42133.1"; exon_number "1";
9	StringTie	exon	46638057	46638250	1000	+	.	gene_id "MSTRG.42133"; transcript_id "MSTRG.42133.1"; exon_number "2";
9	StringTie	exon	46779332	46779565	1000	-	.	gene_id "MSTRG.42136"; transcript_id "MSTRG.42136.1"; exon_number "1";
9	StringTie	exon	46781762	46782335	1000	-	.	gene_id "MSTRG.42136"; transcript_id "MSTRG.42136.1"; exon_number "2";
9	StringTie	exon	46779332	46779565	1000	-	.	gene_id "MSTRG.42136"; transcript_id "MSTRG.42136.2"; exon_number "1";
9	StringTie	exon	46781762	46782010	1000	-	.	gene_id "MSTRG.42136"; transcript_id "MSTRG.42136.2"; exon_number "2";
9	StringTie	exon	46782238	46782335	1000	-	.	gene_id "MSTRG.42136"; transcript_id "MSTRG.42136.2"; exon_number "3";
9	StringTie	exon	46779336	46779668	1000	-	.	gene_id "MSTRG.42136"; transcript_id "MSTRG.42136.3"; exon_number "1";
9	StringTie	exon	46781762	46782010	1000	-	.	gene_id "MSTRG.42136"; transcript_id "MSTRG.42136.3"; exon_number "2";
9	StringTie	exon	46782262	46782327	1000	-	.	gene_id "MSTRG.42136"; transcript_id "MSTRG.42136.3"; exon_number "3";
9	StringTie	exon	46562443	46562589	1000	+	.	gene_id "MSTRG.42138"; transcript_id "MSTRG.42138.1"; exon_number "1";
9	StringTie	exon	46563358	46563453	1000	+	.	gene_id "MSTRG.42138"; transcript_id "MSTRG.42138.1"; exon_number "2";
9	StringTie	exon	46896398	46896482	1000	+	.	gene_id "MSTRG.42149"; transcript_id "MSTRG.42149.1"; exon_number "1";
9	StringTie	exon	46898109	46900467	1000	+	.	gene_id "MSTRG.42149"; transcript_id "MSTRG.42149.1"; exon_number "2";
9	StringTie	exon	73762356	73762554	1000	-	.	gene_id "MSTRG.42616"; transcript_id "MSTRG.42616.1"; exon_number "1";
9	StringTie	exon	73767541	73767593	1000	-	.	gene_id "MSTRG.42616"; transcript_id "MSTRG.42616.1"; exon_number "2";
9	StringTie	exon	73767626	73767752	1000	-	.	gene_id "MSTRG.42617"; transcript_id "MSTRG.42617.1"; exon_number "1";
9	StringTie	exon	73771587	73771664	1000	-	.	gene_id "MSTRG.42617"; transcript_id "MSTRG.42617.1"; exon_number "2";
9	StringTie	exon	76349329	76349412	1000	+	.	gene_id "MSTRG.42686"; transcript_id "MSTRG.42686.1"; exon_number "1";
9	StringTie	exon	76352636	76352714	1000	+	.	gene_id "MSTRG.42686"; transcript_id "MSTRG.42686.1"; exon_number "2";
9	StringTie	exon	76432768	76433015	1000	+	.	gene_id "MSTRG.42686"; transcript_id "MSTRG.42686.1"; exon_number "3";
9	StringTie	exon	76349341	76349412	1000	+	.	gene_id "MSTRG.42686"; transcript_id "MSTRG.42686.2"; exon_number "1";
9	StringTie	exon	76352636	76352714	1000	+	.	gene_id "MSTRG.42686"; transcript_id "MSTRG.42686.2"; exon_number "2";
9	StringTie	exon	76432763	76433016	1000	+	.	gene_id "MSTRG.42686"; transcript_id "MSTRG.42686.2"; exon_number "3";
9	StringTie	exon	94792441	94792700	1000	-	.	gene_id "MSTRG.42986"; transcript_id "MSTRG.42986.1"; exon_number "1";
9	StringTie	exon	94793594	94793662	1000	-	.	gene_id "MSTRG.42986"; transcript_id "MSTRG.42986.1"; exon_number "2";
9	StringTie	exon	94804556	94804685	1000	-	.	gene_id "MSTRG.42986"; transcript_id "MSTRG.42986.1"; exon_number "3";
9	StringTie	exon	94847739	94848136	1000	-	.	gene_id "MSTRG.42986"; transcript_id "MSTRG.42986.1"; exon_number "4";
9	StringTie	exon	106634599	106634830	1000	+	.	gene_id "MSTRG.43272"; transcript_id "MSTRG.43272.1"; exon_number "1";
9	StringTie	exon	106634932	106635218	1000	+	.	gene_id "MSTRG.43272"; transcript_id "MSTRG.43272.1"; exon_number "2";
9	StringTie	exon	114914419	114915134	1000	-	.	gene_id "MSTRG.43415"; transcript_id "MSTRG.43415.1"; exon_number "1";
9	StringTie	exon	114915917	114916245	1000	-	.	gene_id "MSTRG.43415"; transcript_id "MSTRG.43415.1"; exon_number "2";
9	StringTie	exon	122650891	122651828	1000	+	.	gene_id "MSTRG.43561"; transcript_id "MSTRG.43561.1"; exon_number "1";
9	StringTie	exon	122652110	122652229	1000	+	.	gene_id "MSTRG.43561"; transcript_id "MSTRG.43561.1"; exon_number "2";
9	StringTie	exon	122652624	122652861	1000	+	.	gene_id "MSTRG.43561"; transcript_id "MSTRG.43561.1"; exon_number "3";
9	StringTie	exon	123626770	123626829	1000	-	.	gene_id "MSTRG.43605"; transcript_id "MSTRG.43605.1"; exon_number "1";
9	StringTie	exon	123627252	123627588	1000	-	.	gene_id "MSTRG.43605"; transcript_id "MSTRG.43605.1"; exon_number "2";
9	StringTie	exon	123627946	123628195	1000	-	.	gene_id "MSTRG.43605"; transcript_id "MSTRG.43605.1"; exon_number "3";
9	StringTie	exon	123629999	123630367	1000	-	.	gene_id "MSTRG.43605"; transcript_id "MSTRG.43605.1"; exon_number "4";
9	StringTie	exon	129764460	129764759	1000	+	.	gene_id "MSTRG.43715"; transcript_id "MSTRG.43715.1"; exon_number "1";
9	StringTie	exon	129764812	129765010	1000	+	.	gene_id "MSTRG.43715"; transcript_id "MSTRG.43715.1"; exon_number "2";
9	StringTie	exon	130452746	130453036	1000	-	.	gene_id "MSTRG.43718"; transcript_id "MSTRG.43718.1"; exon_number "1";
9	StringTie	exon	130453414	130453572	1000	-	.	gene_id "MSTRG.43718"; transcript_id "MSTRG.43718.1"; exon_number "2";
9	StringTie	exon	130923744	130923907	1000	-	.	gene_id "MSTRG.43754"; transcript_id "MSTRG.43754.1"; exon_number "1";
9	StringTie	exon	130924222	130924309	1000	-	.	gene_id "MSTRG.43754"; transcript_id "MSTRG.43754.1"; exon_number "2";
9	StringTie	exon	131890871	131890908	1000	+	.	gene_id "MSTRG.43801"; transcript_id "MSTRG.43801.1"; exon_number "1";
9	StringTie	exon	131892075	131892248	1000	+	.	gene_id "MSTRG.43801"; transcript_id "MSTRG.43801.1"; exon_number "2";
9	StringTie	exon	131894097	131894252	1000	+	.	gene_id "MSTRG.43801"; transcript_id "MSTRG.43801.1"; exon_number "3";
9	StringTie	exon	131900186	131903261	1000	+	.	gene_id "MSTRG.43801"; transcript_id "MSTRG.43801.1"; exon_number "4";
9	StringTie	exon	131891296	131891746	1000	+	.	gene_id "MSTRG.43801"; transcript_id "MSTRG.43801.2"; exon_number "1";
9	StringTie	exon	131892075	131892248	1000	+	.	gene_id "MSTRG.43801"; transcript_id "MSTRG.43801.2"; exon_number "2";
9	StringTie	exon	131894097	131894252	1000	+	.	gene_id "MSTRG.43801"; transcript_id "MSTRG.43801.2"; exon_number "3";
9	StringTie	exon	131900186	131903259	1000	+	.	gene_id "MSTRG.43801"; transcript_id "MSTRG.43801.2"; exon_number "4";
9	StringTie	exon	131891296	131891427	1000	+	.	gene_id "MSTRG.43801"; transcript_id "MSTRG.43801.3"; exon_number "1";
9	StringTie	exon	131892075	131892248	1000	+	.	gene_id "MSTRG.43801"; transcript_id "MSTRG.43801.3"; exon_number "2";
9	StringTie	exon	131894097	131894252	1000	+	.	gene_id "MSTRG.43801"; transcript_id "MSTRG.43801.3"; exon_number "3";
9	StringTie	exon	131900186	131903259	1000	+	.	gene_id "MSTRG.43801"; transcript_id "MSTRG.43801.3"; exon_number "4";
9	StringTie	exon	133141386	133141419	1000	+	.	gene_id "MSTRG.43804"; transcript_id "MSTRG.43804.1"; exon_number "1";
9	StringTie	exon	133143410	133143477	1000	+	.	gene_id "MSTRG.43804"; transcript_id "MSTRG.43804.1"; exon_number "2";
9	StringTie	exon	133144131	133144719	1000	+	.	gene_id "MSTRG.43804"; transcript_id "MSTRG.43804.1"; exon_number "3";
9	StringTie	exon	134859847	134859969	1000	+	.	gene_id "MSTRG.43812"; transcript_id "MSTRG.43812.1"; exon_number "1";
9	StringTie	exon	134860958	134861240	1000	+	.	gene_id "MSTRG.43812"; transcript_id "MSTRG.43812.1"; exon_number "2";
9	StringTie	exon	133297567	133298059	1000	-	.	gene_id "MSTRG.43822"; transcript_id "MSTRG.43822.1"; exon_number "1";
9	StringTie	exon	133307364	133307418	1000	-	.	gene_id "MSTRG.43822"; transcript_id "MSTRG.43822.1"; exon_number "2";
9	StringTie	exon	137427982	137428081	1000	-	.	gene_id "MSTRG.43842"; transcript_id "MSTRG.43842.1"; exon_number "1";
9	StringTie	exon	137431893	137432069	1000	-	.	gene_id "MSTRG.43842"; transcript_id "MSTRG.43842.1"; exon_number "2";
9	StringTie	exon	139169965	139170244	1000	+	.	gene_id "MSTRG.43848"; transcript_id "MSTRG.43848.1"; exon_number "1";
9	StringTie	exon	139185907	139186879	1000	+	.	gene_id "MSTRG.43848"; transcript_id "MSTRG.43848.1"; exon_number "2";
AEMK02000193.1	StringTie	exon	21556	21635	1000	-	.	gene_id "MSTRG.43897"; transcript_id "MSTRG.43897.1"; exon_number "1";
AEMK02000193.1	StringTie	exon	22809	23008	1000	-	.	gene_id "MSTRG.43897"; transcript_id "MSTRG.43897.1"; exon_number "2";
AEMK02000260.1	StringTie	exon	46709	46829	1000	-	.	gene_id "MSTRG.43960"; transcript_id "MSTRG.43960.1"; exon_number "1";
AEMK02000260.1	StringTie	exon	53992	54103	1000	-	.	gene_id "MSTRG.43960"; transcript_id "MSTRG.43960.1"; exon_number "2";
AEMK02000260.1	StringTie	exon	52686	52818	1000	-	.	gene_id "MSTRG.43962"; transcript_id "MSTRG.43962.1"; exon_number "1";
AEMK02000260.1	StringTie	exon	57776	57874	1000	-	.	gene_id "MSTRG.43962"; transcript_id "MSTRG.43962.1"; exon_number "2";
AEMK02000260.1	StringTie	exon	52686	52818	1000	-	.	gene_id "MSTRG.43962"; transcript_id "MSTRG.43962.2"; exon_number "1";
AEMK02000260.1	StringTie	exon	58937	59157	1000	-	.	gene_id "MSTRG.43962"; transcript_id "MSTRG.43962.2"; exon_number "2";
AEMK02000282.1	StringTie	exon	2373	2501	1000	-	.	gene_id "MSTRG.43980"; transcript_id "MSTRG.43980.1"; exon_number "1";
AEMK02000282.1	StringTie	exon	4253	4333	1000	-	.	gene_id "MSTRG.43980"; transcript_id "MSTRG.43980.1"; exon_number "2";
AEMK02000282.1	StringTie	exon	6904	6978	1000	-	.	gene_id "MSTRG.43980"; transcript_id "MSTRG.43980.1"; exon_number "3";
AEMK02000334.1	StringTie	exon	20567	21221	1000	+	.	gene_id "MSTRG.44056"; transcript_id "MSTRG.44056.1"; exon_number "1";
AEMK02000334.1	StringTie	exon	22967	23104	1000	+	.	gene_id "MSTRG.44056"; transcript_id "MSTRG.44056.1"; exon_number "2";
AEMK02000334.1	StringTie	exon	25530	26295	1000	+	.	gene_id "MSTRG.44056"; transcript_id "MSTRG.44056.1"; exon_number "3";
AEMK02000361.1	StringTie	exon	823286	823637	1000	-	.	gene_id "MSTRG.44076"; transcript_id "MSTRG.44076.1"; exon_number "1";
AEMK02000361.1	StringTie	exon	824688	824901	1000	-	.	gene_id "MSTRG.44076"; transcript_id "MSTRG.44076.1"; exon_number "2";
AEMK02000423.1	StringTie	exon	28040	28256	1000	+	.	gene_id "MSTRG.44106"; transcript_id "MSTRG.44106.1"; exon_number "1";
AEMK02000423.1	StringTie	exon	34671	34840	1000	+	.	gene_id "MSTRG.44106"; transcript_id "MSTRG.44106.1"; exon_number "2";
AEMK02000512.1	StringTie	exon	42759	42827	1000	-	.	gene_id "MSTRG.44352"; transcript_id "MSTRG.44352.1"; exon_number "1";
AEMK02000512.1	StringTie	exon	44956	45342	1000	-	.	gene_id "MSTRG.44352"; transcript_id "MSTRG.44352.1"; exon_number "2";
AEMK02000568.1	StringTie	exon	5138	5555	1000	+	.	gene_id "MSTRG.44422"; transcript_id "MSTRG.44422.1"; exon_number "1";
AEMK02000568.1	StringTie	exon	7681	7749	1000	+	.	gene_id "MSTRG.44422"; transcript_id "MSTRG.44422.1"; exon_number "2";
AEMK02000569.1	StringTie	exon	775468	775683	1000	+	.	gene_id "MSTRG.44436"; transcript_id "MSTRG.44436.3"; exon_number "1";
AEMK02000569.1	StringTie	exon	775853	776016	1000	+	.	gene_id "MSTRG.44436"; transcript_id "MSTRG.44436.3"; exon_number "2";
AEMK02000569.1	StringTie	exon	784110	784223	1000	+	.	gene_id "MSTRG.44436"; transcript_id "MSTRG.44436.3"; exon_number "3";
AEMK02000574.1	StringTie	exon	3316	3342	1000	+	.	gene_id "MSTRG.44437"; transcript_id "MSTRG.44437.1"; exon_number "1";
AEMK02000574.1	StringTie	exon	4586	4767	1000	+	.	gene_id "MSTRG.44437"; transcript_id "MSTRG.44437.1"; exon_number "2";
AEMK02000602.1	StringTie	exon	88873	89826	1000	-	.	gene_id "MSTRG.44481"; transcript_id "MSTRG.44481.1"; exon_number "1";
AEMK02000602.1	StringTie	exon	91604	91751	1000	-	.	gene_id "MSTRG.44481"; transcript_id "MSTRG.44481.1"; exon_number "2";
AEMK02000602.1	StringTie	exon	92295	92446	1000	-	.	gene_id "MSTRG.44481"; transcript_id "MSTRG.44481.1"; exon_number "3";
AEMK02000602.1	StringTie	exon	92895	93357	1000	-	.	gene_id "MSTRG.44481"; transcript_id "MSTRG.44481.1"; exon_number "4";
AEMK02000657.1	StringTie	exon	35290	35409	1000	+	.	gene_id "MSTRG.44535"; transcript_id "MSTRG.44535.1"; exon_number "1";
AEMK02000657.1	StringTie	exon	37529	37604	1000	+	.	gene_id "MSTRG.44535"; transcript_id "MSTRG.44535.1"; exon_number "2";
AEMK02000657.1	StringTie	exon	39136	39361	1000	+	.	gene_id "MSTRG.44535"; transcript_id "MSTRG.44535.1"; exon_number "3";
AEMK02000682.1	StringTie	exon	948135	948299	1000	-	.	gene_id "MSTRG.44605"; transcript_id "MSTRG.44605.1"; exon_number "1";
AEMK02000682.1	StringTie	exon	948760	948880	1000	-	.	gene_id "MSTRG.44605"; transcript_id "MSTRG.44605.1"; exon_number "2";
AEMK02000682.1	StringTie	exon	1555811	1556230	1000	-	.	gene_id "MSTRG.44628"; transcript_id "MSTRG.44628.1"; exon_number "1";
AEMK02000682.1	StringTie	exon	1556359	1557194	1000	-	.	gene_id "MSTRG.44628"; transcript_id "MSTRG.44628.1"; exon_number "2";
AEMK02000682.1	StringTie	exon	1894920	1896663	1000	+	.	gene_id "MSTRG.44639"; transcript_id "MSTRG.44639.1"; exon_number "1";
AEMK02000682.1	StringTie	exon	1897776	1898574	1000	+	.	gene_id "MSTRG.44639"; transcript_id "MSTRG.44639.1"; exon_number "2";
X	StringTie	exon	1208416	1209704	1000	-	.	gene_id "MSTRG.44730"; transcript_id "MSTRG.44730.1"; exon_number "1";
X	StringTie	exon	1219446	1219548	1000	-	.	gene_id "MSTRG.44730"; transcript_id "MSTRG.44730.1"; exon_number "2";
X	StringTie	exon	8295042	8295183	1000	+	.	gene_id "MSTRG.44857"; transcript_id "MSTRG.44857.1"; exon_number "1";
X	StringTie	exon	8295854	8296100	1000	+	.	gene_id "MSTRG.44857"; transcript_id "MSTRG.44857.1"; exon_number "2";
X	StringTie	exon	8296223	8296313	1000	+	.	gene_id "MSTRG.44857"; transcript_id "MSTRG.44857.1"; exon_number "3";
X	StringTie	exon	14356461	14356974	1000	-	.	gene_id "MSTRG.44905"; transcript_id "MSTRG.44905.5"; exon_number "1";
X	StringTie	exon	14383304	14383355	1000	-	.	gene_id "MSTRG.44905"; transcript_id "MSTRG.44905.5"; exon_number "2";
X	StringTie	exon	14386495	14386637	1000	-	.	gene_id "MSTRG.44905"; transcript_id "MSTRG.44905.5"; exon_number "3";
X	StringTie	exon	17488261	17488407	1000	-	.	gene_id "MSTRG.44950"; transcript_id "MSTRG.44950.1"; exon_number "1";
X	StringTie	exon	17556074	17556135	1000	-	.	gene_id "MSTRG.44950"; transcript_id "MSTRG.44950.1"; exon_number "2";
X	StringTie	exon	35094104	35094313	1000	-	.	gene_id "MSTRG.45111"; transcript_id "MSTRG.45111.1"; exon_number "1";
X	StringTie	exon	35099721	35099907	1000	-	.	gene_id "MSTRG.45111"; transcript_id "MSTRG.45111.1"; exon_number "2";
X	StringTie	exon	35103383	35103428	1000	-	.	gene_id "MSTRG.45111"; transcript_id "MSTRG.45111.1"; exon_number "3";
X	StringTie	exon	39145565	39145607	1000	+	.	gene_id "MSTRG.45144"; transcript_id "MSTRG.45144.1"; exon_number "1";
X	StringTie	exon	39152584	39152825	1000	+	.	gene_id "MSTRG.45144"; transcript_id "MSTRG.45144.1"; exon_number "2";
X	StringTie	exon	40938711	40938837	1000	+	.	gene_id "MSTRG.45177"; transcript_id "MSTRG.45177.1"; exon_number "1";
X	StringTie	exon	40943245	40943329	1000	+	.	gene_id "MSTRG.45177"; transcript_id "MSTRG.45177.1"; exon_number "2";
X	StringTie	exon	40943947	40944232	1000	+	.	gene_id "MSTRG.45177"; transcript_id "MSTRG.45177.1"; exon_number "3";
X	StringTie	exon	45688790	45689245	1000	-	.	gene_id "MSTRG.45302"; transcript_id "MSTRG.45302.1"; exon_number "1";
X	StringTie	exon	45705934	45706099	1000	-	.	gene_id "MSTRG.45302"; transcript_id "MSTRG.45302.1"; exon_number "2";
X	StringTie	exon	45721575	45721695	1000	-	.	gene_id "MSTRG.45302"; transcript_id "MSTRG.45302.1"; exon_number "3";
X	StringTie	exon	45755450	45755527	1000	-	.	gene_id "MSTRG.45302"; transcript_id "MSTRG.45302.1"; exon_number "4";
X	StringTie	exon	45757655	45758034	1000	-	.	gene_id "MSTRG.45302"; transcript_id "MSTRG.45302.1"; exon_number "5";
X	StringTie	exon	45756295	45756547	1000	+	.	gene_id "MSTRG.45303"; transcript_id "MSTRG.45303.1"; exon_number "1";
X	StringTie	exon	45762581	45762645	1000	+	.	gene_id "MSTRG.45303"; transcript_id "MSTRG.45303.1"; exon_number "2";
X	StringTie	exon	49201167	49201249	1000	+	.	gene_id "MSTRG.45397"; transcript_id "MSTRG.45397.1"; exon_number "1";
X	StringTie	exon	49207770	49207830	1000	+	.	gene_id "MSTRG.45397"; transcript_id "MSTRG.45397.1"; exon_number "2";
X	StringTie	exon	49230653	49230808	1000	+	.	gene_id "MSTRG.45397"; transcript_id "MSTRG.45397.1"; exon_number "3";
X	StringTie	exon	49182006	49182183	1000	+	.	gene_id "MSTRG.45400"; transcript_id "MSTRG.45400.1"; exon_number "1";
X	StringTie	exon	49188466	49188516	1000	+	.	gene_id "MSTRG.45400"; transcript_id "MSTRG.45400.1"; exon_number "2";
X	StringTie	exon	59303149	59303266	1000	+	.	gene_id "MSTRG.45680"; transcript_id "MSTRG.45680.1"; exon_number "1";
X	StringTie	exon	59303507	59307190	1000	+	.	gene_id "MSTRG.45680"; transcript_id "MSTRG.45680.1"; exon_number "2";
X	StringTie	exon	59546283	59547486	1000	-	.	gene_id "MSTRG.45700"; transcript_id "MSTRG.45700.1"; exon_number "1";
X	StringTie	exon	59548427	59548563	1000	-	.	gene_id "MSTRG.45700"; transcript_id "MSTRG.45700.1"; exon_number "2";
X	StringTie	exon	59550429	59550602	1000	-	.	gene_id "MSTRG.45700"; transcript_id "MSTRG.45700.1"; exon_number "3";
X	StringTie	exon	59546337	59547486	1000	-	.	gene_id "MSTRG.45700"; transcript_id "MSTRG.45700.2"; exon_number "1";
X	StringTie	exon	59548427	59550603	1000	-	.	gene_id "MSTRG.45700"; transcript_id "MSTRG.45700.2"; exon_number "2";
X	StringTie	exon	92223702	92223790	1000	+	.	gene_id "MSTRG.45970"; transcript_id "MSTRG.45970.1"; exon_number "1";
X	StringTie	exon	92330309	92330459	1000	+	.	gene_id "MSTRG.45970"; transcript_id "MSTRG.45970.1"; exon_number "2";
X	StringTie	exon	98758604	98758879	1000	+	.	gene_id "MSTRG.46075"; transcript_id "MSTRG.46075.1"; exon_number "1";
X	StringTie	exon	98771798	98771922	1000	+	.	gene_id "MSTRG.46075"; transcript_id "MSTRG.46075.1"; exon_number "2";
X	StringTie	exon	98821106	98821565	1000	+	.	gene_id "MSTRG.46075"; transcript_id "MSTRG.46075.1"; exon_number "3";
X	StringTie	exon	98812629	98812697	1000	+	.	gene_id "MSTRG.46075"; transcript_id "MSTRG.46075.2"; exon_number "1";
X	StringTie	exon	98821106	98821340	1000	+	.	gene_id "MSTRG.46075"; transcript_id "MSTRG.46075.2"; exon_number "2";
X	StringTie	exon	104517428	104517454	1000	-	.	gene_id "MSTRG.46085"; transcript_id "MSTRG.46085.1"; exon_number "1";
X	StringTie	exon	104518618	104518876	1000	-	.	gene_id "MSTRG.46085"; transcript_id "MSTRG.46085.1"; exon_number "2";
X	StringTie	exon	108351252	108351899	1000	+	.	gene_id "MSTRG.46137"; transcript_id "MSTRG.46137.1"; exon_number "1";
X	StringTie	exon	108356389	108356413	1000	+	.	gene_id "MSTRG.46137"; transcript_id "MSTRG.46137.1"; exon_number "2";
X	StringTie	exon	121502563	121503464	1000	-	.	gene_id "MSTRG.46256"; transcript_id "MSTRG.46256.1"; exon_number "1";
X	StringTie	exon	121530639	121530685	1000	-	.	gene_id "MSTRG.46256"; transcript_id "MSTRG.46256.1"; exon_number "2";
X	StringTie	exon	124949324	124950075	1000	-	.	gene_id "MSTRG.46348"; transcript_id "MSTRG.46348.1"; exon_number "1";
X	StringTie	exon	124951979	124952307	1000	-	.	gene_id "MSTRG.46348"; transcript_id "MSTRG.46348.1"; exon_number "2";
