# Supplementary material for: Transcriptome Analysis Reveals the Effect of Long Intergenic Noncoding RNAs on Pig Muscle Growth and Fat Deposition
Source: Biomed Res Int. 2019 Jun 25;2019:2951427. doi: 10.1155/2019/2951427 (PMC6614983; doi:10.1155/2019/2951427)
Supplement: Supplementary Materials — File S1: All lincRNAs comment files. Table S1: The specific expression of the DEGs between two tissues (af vs. ldm). Table S2: The specific expression of the DEGs between two tissues (af vs. liver). Table S3: The specific expression of the DEGs between two tissues (ldm vs. liver). Table S4: The basic information of the 272 DEGs. Table S5: Results of functional enrichment in gene ontology and pathway analysis. Table S6: Results of relevant QTLs screened by DELs. Table S7: PCR primers of 4 pairs of lincRNAs and PTGs. [file 2951427.f1.zip › TableS4.xlsx]

## Sheet: 工作表1
MSTRG.10246
MSTRG.10426
MSTRG.10444
MSTRG.10519
MSTRG.10613
MSTRG.10765
MSTRG.11563
MSTRG.11840
MSTRG.11907
MSTRG.12018
MSTRG.13524
MSTRG.13534
MSTRG.14116
MSTRG.14142
MSTRG.1497
MSTRG.1509
MSTRG.15398
MSTRG.1558
MSTRG.15588
MSTRG.16201
MSTRG.16206
MSTRG.16341
MSTRG.16369
MSTRG.16510
MSTRG.16755
MSTRG.17119
MSTRG.17362
MSTRG.17427
MSTRG.1813
MSTRG.18420
MSTRG.18422
MSTRG.19662
MSTRG.20255
MSTRG.21367
MSTRG.21405
MSTRG.21748
MSTRG.21991
MSTRG.22448
MSTRG.2297
MSTRG.23404
MSTRG.23913
MSTRG.23931
MSTRG.24538
MSTRG.25575
MSTRG.25814
MSTRG.25916
MSTRG.27192
MSTRG.27395
MSTRG.27594
MSTRG.27671
MSTRG.27673
MSTRG.27879
MSTRG.28046
MSTRG.28140
MSTRG.28616
MSTRG.28643
MSTRG.29094
MSTRG.29147
MSTRG.29489
MSTRG.29499
MSTRG.29579
MSTRG.29619
MSTRG.29856
MSTRG.29929
MSTRG.30014
MSTRG.30416
MSTRG.30455
MSTRG.30495
MSTRG.306
MSTRG.31416
MSTRG.31569
MSTRG.31850
MSTRG.319
MSTRG.32121
MSTRG.33118
MSTRG.33443
MSTRG.34
MSTRG.34904
MSTRG.35179
MSTRG.35876
MSTRG.36191
MSTRG.36245
MSTRG.3631
MSTRG.36336
MSTRG.36357
MSTRG.36449
MSTRG.38797
MSTRG.38847
MSTRG.38948
MSTRG.39061
MSTRG.39
MSTRG.39148
MSTRG.3931
MSTRG.40065
MSTRG.40066
MSTRG.40320
MSTRG.40638
MSTRG.40844
MSTRG.4
MSTRG.41419
MSTRG.4184
MSTRG.42149
MSTRG.4258
MSTRG.42686
MSTRG.42986
MSTRG.43272
MSTRG.43605
MSTRG.44730
MSTRG.44905
MSTRG.45111
MSTRG.4575
MSTRG.46348
MSTRG.5340
MSTRG.5642
MSTRG.5710
MSTRG.572
MSTRG.5731
MSTRG.6349
MSTRG.7076
MSTRG.7254
MSTRG.7296
MSTRG.7361
MSTRG.761
MSTRG.7878
MSTRG.852
MSTRG.8832
MSTRG.8903
MSTRG.9345
MSTRG.10672
MSTRG.11794
MSTRG.11838
MSTRG.11956
MSTRG.11957
MSTRG.11979
MSTRG.11992
MSTRG.12063
MSTRG.12154
MSTRG.12369
MSTRG.12464
MSTRG.12632
MSTRG.131
MSTRG.13672
MSTRG.14730
MSTRG.14789
MSTRG.14901
MSTRG.14920
MSTRG.17153
MSTRG.17304
MSTRG.17517
MSTRG.17550
MSTRG.17923
MSTRG.18019
MSTRG.18380
MSTRG.18413
MSTRG.18732
MSTRG.19076
MSTRG.19781
MSTRG.20397
MSTRG.20485
MSTRG.20609
MSTRG.21383
MSTRG.21479
MSTRG.21681
MSTRG.21685
MSTRG.22251
MSTRG.22252
MSTRG.22692
MSTRG.23347
MSTRG.23822
MSTRG.23949
MSTRG.24686
MSTRG.24922
MSTRG.25463
MSTRG.25602
MSTRG.25859
MSTRG.25911
MSTRG.26390
MSTRG.26824
MSTRG.27209
MSTRG.27235
MSTRG.27295
MSTRG.27502
MSTRG.2773
MSTRG.27743
MSTRG.27989
MSTRG.28005
MSTRG.28496
MSTRG.28946
MSTRG.29514
MSTRG.29576
MSTRG.29624
MSTRG.29625
MSTRG.29891
MSTRG.30174
MSTRG.30414
MSTRG.30952
MSTRG.32503
MSTRG.32844
MSTRG.32975
MSTRG.32981
MSTRG.33009
MSTRG.33620
MSTRG.33728
MSTRG.3379
MSTRG.34015
MSTRG.35396
MSTRG.36114
MSTRG.36333
MSTRG.36426
MSTRG.37
MSTRG.37277
MSTRG.37503
MSTRG.37757
MSTRG.38217
MSTRG.38477
MSTRG.38483
MSTRG.39033
MSTRG.39064
MSTRG.39358
MSTRG.40476
MSTRG.40830
MSTRG.40858
MSTRG.40883
MSTRG.41
MSTRG.41237
MSTRG.41561
MSTRG.41650
MSTRG.42018
MSTRG.42136
MSTRG.43415
MSTRG.43561
MSTRG.43715
MSTRG.43754
MSTRG.43822
MSTRG.44056
MSTRG.44076
MSTRG.44481
MSTRG.45144
MSTRG.45177
MSTRG.4573
MSTRG.46075
MSTRG.46137
MSTRG.4619
MSTRG.4710
MSTRG.4718
MSTRG.4876
MSTRG.5520
MSTRG.5522
MSTRG.6272
MSTRG.6698
MSTRG.6744
MSTRG.6758
MSTRG.6767
MSTRG.6904
MSTRG.6905
MSTRG.7054
MSTRG.7557
MSTRG.7819
MSTRG.8027
MSTRG.834
MSTRG.8762
MSTRG.9844
MSTRG.101
MSTRG.20905
MSTRG.2853
MSTRG.41013
MSTRG.43848
MSTRG.6027
MSTRG.6580
MSTRG.7797
MSTRG.7868
MSTRG.8250
