# Supplementary material for: Transcriptome Analysis Reveals the Effect of Long Intergenic Noncoding RNAs on Pig Muscle Growth and Fat Deposition
Source: Biomed Res Int. 2019 Jun 25;2019:2951427. doi: 10.1155/2019/2951427 (PMC6614983; doi:10.1155/2019/2951427)
Supplement: Supplementary Materials — File S1: All lincRNAs comment files. Table S1: The specific expression of the DEGs between two tissues (af vs. ldm). Table S2: The specific expression of the DEGs between two tissues (af vs. liver). Table S3: The specific expression of the DEGs between two tissues (ldm vs. liver). Table S4: The basic information of the 272 DEGs. Table S5: Results of functional enrichment in gene ontology and pathway analysis. Table S6: Results of relevant QTLs screened by DELs. Table S7: PCR primers of 4 pairs of lincRNAs and PTGs. [file 2951427.f1.zip › TableS5.xlsx]

## Sheet: 工作表1
Category	Term	Count	%	PValue	Genes	List Total	Pop Hits	Pop Total	Fold Enrichment	Bonferroni	Benjamini	FDR
GOTERM_BP_DIRECT	oxidation-reduction process	34	4.50928	0.0155048	ENSG00000100938, ENSG00000134013, ENSG00000104522, ENSG00000112992, ENSG00000104524, ENSG00000175806, ENSG00000188641, ENSG00000159692, ENSG00000134824, ENSG00000160211, ENSG00000131480, ENSG00000172893, ENSG00000186684, ENSG00000162882, ENSG00000117594, ENSG00000198736, ENSG00000131781, ENSG00000080511, ENSG00000221968, ENSG00000132746, ENSG00000143753, ENSG00000117791, ENSG00000142168, ENSG0000…	631	592	16792	1.52838	1	0.959796	24.0625
GOTERM_BP_DIRECT	multicellular organism development	31	4.11141	0.013573	ENSG00000175879, ENSG00000157927, ENSG00000128714, ENSG00000179954, ENSG00000121297, ENSG00000090006, ENSG00000254656, ENSG00000197757, ENSG00000130827, ENSG00000124782, ENSG00000094975, ENSG00000167074, ENSG00000166526, ENSG00000152430, ENSG00000143147, ENSG00000198353, ENSG00000135373, ENSG00000095627, ENSG00000112679, ENSG00000185453, ENSG00000270629, ENSG00000170166, ENSG00000165209, ENSG0000…	631	521	16792	1.58342	1	0.953399	21.3944
GOTERM_BP_DIRECT	regulation of transcription from RNA polymerase II promoter	25	3.31565	0.0444376	ENSG00000173011, ENSG00000145214, ENSG00000118260, ENSG00000167800, ENSG00000197063, ENSG00000121297, ENSG00000139613, ENSG00000172789, ENSG00000197757, ENSG00000167074, ENSG00000103479, ENSG00000125798, ENSG00000198815, ENSG00000181827, ENSG00000204612, ENSG00000059588, ENSG00000197780, ENSG00000164916, ENSG00000171872, ENSG00000118900, ENSG00000132740, ENSG00000129559, ENSG00000143178, ENSG0000…	631	441	16792	1.5086	1	0.981804	55.0987
GOTERM_BP_DIRECT	anterior/posterior pattern specification	15	1.98939	1.45014e-06	ENSG00000128714, ENSG00000128710, ENSG00000172789, ENSG00000128709, ENSG00000197757, ENSG00000170166, ENSG00000128652, ENSG00000075275, ENSG00000180806, ENSG00000109906, ENSG00000180818, ENSG00000037965, ENSG00000123388, ENSG00000123364, ENSG00000198353	631	80	16792	4.9897	0.00357255	0.00357255	0.00255442
GOTERM_BP_DIRECT	regulation of cell proliferation	13	1.72414	0.0464141	ENSG00000172893, ENSG00000128714, ENSG00000143178, ENSG00000130816, ENSG00000116833, ENSG00000065361, ENSG00000100320, ENSG00000112679, ENSG00000197063, ENSG00000067182, ENSG00000144891, ENSG00000125398, ENSG00000146072	631	185	16792	1.87001	1	0.979955	56.7069
GOTERM_BP_DIRECT	cellular protein modification process	12	1.59151	0.00193857	ENSG00000092295, ENSG00000134013, ENSG00000008513, ENSG00000100949, ENSG00000108106, ENSG00000129465, ENSG00000175806, ENSG00000109323, ENSG00000129559, ENSG00000102178, ENSG00000103174, ENSG00000175536	631	105	16792	3.04134	0.99168	0.54985	3.36039
GOTERM_BP_DIRECT	lipid metabolic process	12	1.59151	0.0345763	ENSG00000186951, ENSG00000221968, ENSG00000132746, ENSG00000198670, ENSG00000265203, ENSG00000173599, ENSG00000110721, ENSG00000138823, ENSG00000160211, ENSG00000006534, ENSG00000110697, ENSG00000134824	631	157	16792	2.03402	1	0.984005	46.1974
GOTERM_BP_DIRECT	negative regulation of gene expression	11	1.45889	0.0336381	ENSG00000198879, ENSG00000162702, ENSG00000091831, ENSG00000118260, ENSG00000073921, ENSG00000173599, ENSG00000103479, ENSG00000115738, ENSG00000134057, ENSG00000092969, ENSG00000277632	631	137	16792	2.13671	1	0.988258	45.2688
GOTERM_BP_DIRECT	detection of chemical stimulus involved in sensory perception of bitter taste	9	1.19363	9.96804e-05	ENSG00000226761, ENSG00000255837, ENSG00000186136, ENSG00000256436, ENSG00000255374, ENSG00000256188, ENSG00000212126, ENSG00000212124, ENSG00000160862	631	40	16792	5.98764	0.218096	0.0787352	0.175444
GOTERM_BP_DIRECT	platelet degranulation	9	1.19363	0.0397835	ENSG00000115956, ENSG00000261371, ENSG00000110799, ENSG00000142168, ENSG00000250722, ENSG00000196924, ENSG00000010278, ENSG00000092969, ENSG00000122194	631	103	16792	2.3253	1	0.987173	51.0864
GOTERM_BP_DIRECT	response to ethanol	9	1.19363	0.0437754	ENSG00000069535, ENSG00000066926, ENSG00000145391, ENSG00000142168, ENSG00000172955, ENSG00000084207, ENSG00000121691, ENSG00000160211, ENSG00000166736	631	105	16792	2.28101	1	0.983288	54.5474
GOTERM_BP_DIRECT	sensory perception of taste	8	1.06101	7.6783e-05	ENSG00000226761, ENSG00000255837, ENSG00000186136, ENSG00000256436, ENSG00000255374, ENSG00000256188, ENSG00000111319, ENSG00000212124	631	29	16792	7.34117	0.172634	0.0904032	0.135168
GOTERM_BP_DIRECT	neutrophil chemotaxis	8	1.06101	0.0116077	ENSG00000275302, ENSG00000105851, ENSG00000123338, ENSG00000276070, ENSG00000275385, ENSG00000276085, ENSG00000092969, ENSG00000277632	631	66	16792	3.22566	1	0.943951	18.5896
GOTERM_BP_DIRECT	phospholipase C-activating G-protein coupled receptor signaling pathway	8	1.06101	0.0116077	ENSG00000213903, ENSG00000091831, ENSG00000213906, ENSG00000171596, ENSG00000244165, ENSG00000160801, ENSG00000169860, ENSG00000144891	631	66	16792	3.22566	1	0.943951	18.5896
GOTERM_BP_DIRECT	positive regulation of inflammatory response	8	1.06101	0.0194402	ENSG00000275302, ENSG00000196776, ENSG00000276070, ENSG00000275385, ENSG00000276085, ENSG00000067182, ENSG00000144891, ENSG00000277632	631	73	16792	2.91635	1	0.968595	29.2357
GOTERM_BP_DIRECT	response to toxic substance	8	1.06101	0.0403286	ENSG00000225830, ENSG00000275302, ENSG00000069535, ENSG00000143595, ENSG00000084207, ENSG00000115884, ENSG00000110721, ENSG00000277632	631	85	16792	2.50463	1	0.985492	51.5732
GOTERM_BP_DIRECT	actin cytoskeleton reorganization	7	0.928382	0.00790464	ENSG00000170989, ENSG00000115956, ENSG00000154310, ENSG00000006607, ENSG00000196396, ENSG00000197702, ENSG00000196924	631	47	16792	3.96345	1	0.93907	13.0463
GOTERM_BP_DIRECT	monocyte chemotaxis	6	0.795756	0.0197939	ENSG00000275302, ENSG00000160712, ENSG00000276070, ENSG00000275385, ENSG00000276085, ENSG00000277632	631	42	16792	3.80168	1	0.962724	29.6839
GOTERM_BP_DIRECT	activation of protein kinase activity	6	0.795756	0.0259568	ENSG00000135932, ENSG00000162999, ENSG00000123338, ENSG00000129465, ENSG00000092969, ENSG00000121879	631	45	16792	3.54823	1	0.982694	37.0779
GOTERM_BP_DIRECT	Rho protein signal transduction	6	0.795756	0.0387094	ENSG00000173156, ENSG00000261371, ENSG00000141522, ENSG00000137962, ENSG00000075275, ENSG00000144891	631	50	16792	3.19341	1	0.988071	50.1136
GOTERM_BP_DIRECT	skeletal muscle tissue development	6	0.795756	0.0416458	ENSG00000160808, ENSG00000102125, ENSG00000196465, ENSG00000128710, ENSG00000128709, ENSG00000092841	631	51	16792	3.13079	1	0.984994	52.7308
GOTERM_BP_DIRECT	adult locomotory behavior	6	0.795756	0.0447131	ENSG00000197587, ENSG00000128710, ENSG00000165409, ENSG00000125798, ENSG00000115738, ENSG00000128709	631	52	16792	3.07058	1	0.979615	55.3261
GOTERM_BP_DIRECT	ethanol oxidation	5	0.66313	0.000763512	ENSG00000198099, ENSG00000172955, ENSG00000187758, ENSG00000248144, ENSG00000196616	631	12	16792	11.0882	0.848181	0.375789	1.33644
GOTERM_BP_DIRECT	oligodendrocyte development	5	0.66313	0.0098442	ENSG00000265763, ENSG00000084207, ENSG00000115738, ENSG00000124920, ENSG00000010278	631	23	16792	5.78516	1	0.952735	15.9927
GOTERM_BP_DIRECT	proximal/distal pattern formation	5	0.66313	0.0114694	ENSG00000128710, ENSG00000180818, ENSG00000123388, ENSG00000198719, ENSG00000128709	631	24	16792	5.54411	1	0.957716	18.3888
GOTERM_BP_DIRECT	positive regulation of JUN kinase activity	5	0.66313	0.0276561	ENSG00000162999, ENSG00000146192, ENSG00000163251, ENSG00000085511, ENSG00000156299	631	31	16792	4.29221	1	0.98295	38.9838
GOTERM_BP_DIRECT	regulation of endocytosis	5	0.66313	0.0276561	ENSG00000136717, ENSG00000111540, ENSG00000073921, ENSG00000196396, ENSG00000140022	631	31	16792	4.29221	1	0.98295	38.9838
GOTERM_BP_DIRECT	endosome organization	5	0.66313	0.0306985	ENSG00000178038, ENSG00000111540, ENSG00000135823, ENSG00000166971, ENSG00000265190	631	32	16792	4.15808	1	0.986089	42.2608
GOTERM_BP_DIRECT	alcohol metabolic process	4	0.530504	0.000965624	ENSG00000198099, ENSG00000132746, ENSG00000187758, ENSG00000006534	631	6	16792	17.7412	0.907847	0.379272	1.68739
GOTERM_BP_DIRECT	heart valve morphogenesis	3	0.397878	0.0190655	ENSG00000127418, ENSG00000092969, ENSG00000125398	631	6	16792	13.3059	1	0.974124	28.7578
GOTERM_BP_DIRECT	protein repair	3	0.397878	0.0190655	ENSG00000148450, ENSG00000175806, ENSG00000198736	631	6	16792	13.3059	1	0.974124	28.7578
GOTERM_BP_DIRECT	calcineurin-NFAT signaling cascade	3	0.397878	0.0338609	ENSG00000138814, ENSG00000100968, ENSG00000221823	631	8	16792	9.9794	1	0.985747	45.4907
GOTERM_BP_DIRECT	negative regulation of pri-miRNA transcription from RNA polymerase II promoter	3	0.397878	0.0424707	ENSG00000186951, ENSG00000100968, ENSG00000125398	631	9	16792	8.87058	1	0.983748	53.4425
KEGG_PATHWAY	Tyrosine metabolism	11	1.45889	1.18889e-06	ENSG00000069535, ENSG00000198099, ENSG00000132746, ENSG00000172955, ENSG00000187758, ENSG00000131471, ENSG00000248144, ENSG00000180185, ENSG00000006534, ENSG00000131480, ENSG00000196616	295	35	6910	7.36174	0.000297178	0.000297178	0.00154447
KEGG_PATHWAY	Taste transduction	10	1.32626	9.26315e-05	ENSG00000226761, ENSG00000255837, ENSG00000186136, ENSG00000129467, ENSG00000256436, ENSG00000255374, ENSG00000256188, ENSG00000212126, ENSG00000111319, ENSG00000212124	295	45	6910	5.20527	0.0228928	0.0115127	0.12027
KEGG_PATHWAY	Drug metabolism - cytochrome P450	11	1.45889	0.000541633	ENSG00000069535, ENSG00000198099, ENSG00000085871, ENSG00000132746, ENSG00000172955, ENSG00000084207, ENSG00000187758, ENSG00000248144, ENSG00000131781, ENSG00000006534, ENSG00000196616	295	68	6910	3.78913	0.126673	0.0441443	0.701353
KEGG_PATHWAY	Metabolism of xenobiotics by cytochrome P450	11	1.45889	0.00106847	ENSG00000198099, ENSG00000105398, ENSG00000085871, ENSG00000132746, ENSG00000172955, ENSG00000084207, ENSG00000117594, ENSG00000187758, ENSG00000248144, ENSG00000006534, ENSG00000196616	295	74	6910	3.48191	0.234526	0.0646318	1.37919
KEGG_PATHWAY	Chemical carcinogenesis	11	1.45889	0.001956	ENSG00000198099, ENSG00000105398, ENSG00000085871, ENSG00000132746, ENSG00000172955, ENSG00000084207, ENSG00000117594, ENSG00000187758, ENSG00000248144, ENSG00000006534, ENSG00000196616	295	80	6910	3.22076	0.387055	0.0932568	2.51145
KEGG_PATHWAY	Phenylalanine metabolism	5	0.66313	0.00492292	ENSG00000069535, ENSG00000132746, ENSG00000131471, ENSG00000006534, ENSG00000131480	295	17	6910	6.88933	0.708807	0.185864	6.20995
KEGG_PATHWAY	Insulin resistance	12	1.59151	0.00599294	ENSG00000118260, ENSG00000105851, ENSG00000268173, ENSG00000131482, ENSG00000121879, ENSG00000186951, ENSG00000105647, ENSG00000196396, ENSG00000113396, ENSG00000131791, ENSG00000067182, ENSG00000110090, ENSG00000163581	295	108	6910	2.60264	0.777481	0.193198	7.51172
KEGG_PATHWAY	Glucagon signaling pathway	11	1.45889	0.00911717	ENSG00000138814, ENSG00000186951, ENSG00000152270, ENSG00000118260, ENSG00000215644, ENSG00000221823, ENSG00000131791, ENSG00000164776, ENSG00000131482, ENSG00000163581, ENSG00000110090	295	99	6910	2.60264	0.898708	0.248901	11.2178
KEGG_PATHWAY	beta-Alanine metabolism	6	0.795756	0.00921429	ENSG00000103150, ENSG00000132746, ENSG00000131471, ENSG00000188641, ENSG00000006534, ENSG00000131480	295	31	6910	4.53362	0.90116	0.226739	11.3308
KEGG_PATHWAY	Glycolysis / Gluconeogenesis	8	1.06101	0.0230238	ENSG00000198099, ENSG00000132746, ENSG00000172955, ENSG00000187758, ENSG00000248144, ENSG00000131482, ENSG00000006534, ENSG00000196616	295	67	6910	2.79686	0.997042	0.441401	26.1104
KEGG_PATHWAY	B cell receptor signaling pathway	8	1.06101	0.0265979	ENSG00000138814, ENSG00000105647, ENSG00000105851, ENSG00000221823, ENSG00000070190, ENSG00000269335, ENSG00000121879, ENSG00000268173, ENSG00000142867	295	69	6910	2.71579	0.998817	0.458105	29.5461
KEGG_PATHWAY	FoxO signaling pathway	12	1.59151	0.0271029	ENSG00000170989, ENSG00000145391, ENSG00000105647, ENSG00000105851, ENSG00000103479, ENSG00000131791, ENSG00000134057, ENSG00000121691, ENSG00000092969, ENSG00000121879, ENSG00000131482, ENSG00000268173, ENSG00000123374	295	134	6910	2.09765	0.998961	0.43585	30.0194
KEGG_PATHWAY	Progesterone-mediated oocyte maturation	9	1.19363	0.031098	ENSG00000127564, ENSG00000141552, ENSG00000152270, ENSG00000105647, ENSG00000129467, ENSG00000105851, ENSG00000134057, ENSG00000121879, ENSG00000268173, ENSG00000123374	295	87	6910	2.42314	0.999628	0.455308	33.662
KEGG_PATHWAY	Fatty acid degradation	6	0.795756	0.0377097	ENSG00000198099, ENSG00000172955, ENSG00000187758, ENSG00000248144, ENSG00000196616, ENSG00000110090	295	44	6910	3.19414	0.999933	0.496621	39.3081
KEGG_PATHWAY	Metabolic pathways	65	8.62069	0.042172	ENSG00000106302, ENSG00000117411, ENSG00000145214, ENSG00000103024, ENSG00000188641, ENSG00000180185, ENSG00000160211, ENSG00000188690, ENSG00000172893, ENSG00000104879, ENSG00000127415, ENSG00000172955, ENSG00000117594, ENSG00000117410, ENSG00000196616, ENSG00000135845, ENSG00000146733, ENSG00000132746, ENSG00000182156, ENSG00000131471, ENSG00000198099, ENSG00000160471, ENSG00000086544, ENSG0000…	295	1228	6910	1.23986	0.999979	0.512331	42.8644
