# Supplementary material for: Transcriptome Analysis Reveals the Effect of Long Intergenic Noncoding RNAs on Pig Muscle Growth and Fat Deposition
Source: Biomed Res Int. 2019 Jun 25;2019:2951427. doi: 10.1155/2019/2951427 (PMC6614983; doi:10.1155/2019/2951427)
Supplement: Supplementary Materials — File S1: All lincRNAs comment files. Table S1: The specific expression of the DEGs between two tissues (af vs. ldm). Table S2: The specific expression of the DEGs between two tissues (af vs. liver). Table S3: The specific expression of the DEGs between two tissues (ldm vs. liver). Table S4: The basic information of the 272 DEGs. Table S5: Results of functional enrichment in gene ontology and pathway analysis. Table S6: Results of relevant QTLs screened by DELs. Table S7: PCR primers of 4 pairs of lincRNAs and PTGs. [file 2951427.f1.zip › TableS6.xlsx]

## Sheet: 工作表1
1	2701298	292955427	Muscle moisture percentage QTL (38073)	1	7058679	7061189	MSTRG.131.1
1	2701298	292955427	Muscle moisture percentage QTL (38073)	1	14148364	14151438	MSTRG.306.1
1	2701298	292955427	Muscle moisture percentage QTL (38073)	1	16653403	16681491	MSTRG.319.1
1	2701298	292955427	Muscle moisture percentage QTL (38073)	1	16659399	16681491	MSTRG.319.2
1	2701298	292955427	Muscle moisture percentage QTL (38073)	1	30776372	30781149	MSTRG.572.1
1	2701298	292955427	Muscle moisture percentage QTL (38073)	1	43980633	43981357	MSTRG.761.1
1	2701298	292955427	Muscle moisture percentage QTL (38073)	1	51496270	51499483	MSTRG.834.1
1	2701298	292955427	Muscle moisture percentage QTL (38073)	1	52447424	52460077	MSTRG.852.1
1	2701298	292955427	Muscle moisture percentage QTL (38073)	1	107150104	107154187	MSTRG.1509.1
1	2701298	292955427	Muscle moisture percentage QTL (38073)	1	107150105	107154546	MSTRG.1509.2
1	2701298	292955427	Muscle moisture percentage QTL (38073)	1	109184403	109189089	MSTRG.1558.1
1	2701298	292955427	Muscle moisture percentage QTL (38073)	1	109185924	109189089	MSTRG.1558.2
1	2701298	292955427	Muscle moisture percentage QTL (38073)	1	115698959	115734281	MSTRG.1813.1
1	2701298	292955427	Muscle moisture percentage QTL (38073)	1	138258064	138262930	MSTRG.2297.1
1	2701298	292955427	Muscle moisture percentage QTL (38073)	1	179788962	179799724	MSTRG.2773.1
1	2701298	292955427	Muscle moisture percentage QTL (38073)	1	179796932	179799853	MSTRG.2773.2
1	2701298	292955427	Muscle moisture percentage QTL (38073)	1	213147552	213195062	MSTRG.3379.1
1	2701298	292955427	Muscle moisture percentage QTL (38073)	1	247060447	247069977	MSTRG.3931.1
1	2701298	292955427	Muscle moisture percentage QTL (38073)	1	247062253	247065719	MSTRG.3931.2
1	2701298	292955427	Muscle moisture percentage QTL (38073)	1	264223330	264237373	MSTRG.4184.1
1	2701298	292955427	Muscle moisture percentage QTL (38073)	1	264223330	264237373	MSTRG.4184.2
1	2701298	292955427	Muscle moisture percentage QTL (38073)	1	267187495	267188526	MSTRG.4258.2
1	2701298	292955427	Muscle moisture percentage QTL (38073)	1	267187495	267206909	MSTRG.4258.1
1	2701298	292955427	Muscle moisture percentage QTL (38073)	1	229871932	229955811	MSTRG.3631.1
1	2701298	292955427	Muscle moisture percentage QTL (38073)	1	106933151	106963961	MSTRG.1497.1
1	2701298	16114132	Diameter of angular fibers QTL (2793)	1	7058679	7061189	MSTRG.131.1
1	2701298	16114132	Diameter of angular fibers QTL (2793)	1	14148364	14151438	MSTRG.306.1
1	2701298	16114132	Loin muscle area QTL (3221)	1	7058679	7061189	MSTRG.131.1
1	2701298	16114132	Loin muscle area QTL (3221)	1	14148364	14151438	MSTRG.306.1
1	2701298	16114132	Loin muscle area QTL (21352)	1	7058679	7061189	MSTRG.131.1
1	2701298	16114132	Loin muscle area QTL (21352)	1	14148364	14151438	MSTRG.306.1
1	2701298	20064508	Glucose level QTL (15087)	1	7058679	7061189	MSTRG.131.1
1	2701298	20064508	Glucose level QTL (15087)	1	14148364	14151438	MSTRG.306.1
1	2701298	20064508	Glucose level QTL (15087)	1	16653403	16681491	MSTRG.319.1
1	2701298	20064508	Glucose level QTL (15087)	1	16659399	16681491	MSTRG.319.2
1	2701298	16114132	Body weight (birth) QTL (826)	1	7058679	7061189	MSTRG.131.1
1	2701298	16114132	Body weight (birth) QTL (826)	1	14148364	14151438	MSTRG.306.1
1	2701298	16114132	Teat number QTL (276)	1	7058679	7061189	MSTRG.131.1
1	2701298	16114132	Teat number QTL (276)	1	14148364	14151438	MSTRG.306.1
1	2701298	274130998	Marbling QTL (38049)	1	7058679	7061189	MSTRG.131.1
1	2701298	274130998	Marbling QTL (38049)	1	14148364	14151438	MSTRG.306.1
1	2701298	274130998	Marbling QTL (38049)	1	16653403	16681491	MSTRG.319.1
1	2701298	274130998	Marbling QTL (38049)	1	16659399	16681491	MSTRG.319.2
1	2701298	274130998	Marbling QTL (38049)	1	30776372	30781149	MSTRG.572.1
1	2701298	274130998	Marbling QTL (38049)	1	43980633	43981357	MSTRG.761.1
1	2701298	274130998	Marbling QTL (38049)	1	51496270	51499483	MSTRG.834.1
1	2701298	274130998	Marbling QTL (38049)	1	52447424	52460077	MSTRG.852.1
1	2701298	274130998	Marbling QTL (38049)	1	107150104	107154187	MSTRG.1509.1
1	2701298	274130998	Marbling QTL (38049)	1	107150105	107154546	MSTRG.1509.2
1	2701298	274130998	Marbling QTL (38049)	1	109184403	109189089	MSTRG.1558.1
1	2701298	274130998	Marbling QTL (38049)	1	109185924	109189089	MSTRG.1558.2
1	2701298	274130998	Marbling QTL (38049)	1	115698959	115734281	MSTRG.1813.1
1	2701298	274130998	Marbling QTL (38049)	1	138258064	138262930	MSTRG.2297.1
1	2701298	274130998	Marbling QTL (38049)	1	179788962	179799724	MSTRG.2773.1
1	2701298	274130998	Marbling QTL (38049)	1	179796932	179799853	MSTRG.2773.2
1	2701298	274130998	Marbling QTL (38049)	1	213147552	213195062	MSTRG.3379.1
1	2701298	274130998	Marbling QTL (38049)	1	247060447	247069977	MSTRG.3931.1
1	2701298	274130998	Marbling QTL (38049)	1	247062253	247065719	MSTRG.3931.2
1	2701298	274130998	Marbling QTL (38049)	1	264223330	264237373	MSTRG.4184.1
1	2701298	274130998	Marbling QTL (38049)	1	264223330	264237373	MSTRG.4184.2
1	2701298	274130998	Marbling QTL (38049)	1	267187495	267188526	MSTRG.4258.2
1	2701298	274130998	Marbling QTL (38049)	1	267187495	267206909	MSTRG.4258.1
1	2701298	274130998	Marbling QTL (38049)	1	229871932	229955811	MSTRG.3631.1
1	2701298	274130998	Marbling QTL (38049)	1	106933151	106963961	MSTRG.1497.1
1	2701298	292955427	Loin muscle area QTL (38072)	1	7058679	7061189	MSTRG.131.1
1	2701298	292955427	Loin muscle area QTL (38072)	1	14148364	14151438	MSTRG.306.1
1	2701298	292955427	Loin muscle area QTL (38072)	1	16653403	16681491	MSTRG.319.1
1	2701298	292955427	Loin muscle area QTL (38072)	1	16659399	16681491	MSTRG.319.2
1	2701298	292955427	Loin muscle area QTL (38072)	1	30776372	30781149	MSTRG.572.1
1	2701298	292955427	Loin muscle area QTL (38072)	1	43980633	43981357	MSTRG.761.1
1	2701298	292955427	Loin muscle area QTL (38072)	1	51496270	51499483	MSTRG.834.1
1	2701298	292955427	Loin muscle area QTL (38072)	1	52447424	52460077	MSTRG.852.1
1	2701298	292955427	Loin muscle area QTL (38072)	1	107150104	107154187	MSTRG.1509.1
1	2701298	292955427	Loin muscle area QTL (38072)	1	107150105	107154546	MSTRG.1509.2
1	2701298	292955427	Loin muscle area QTL (38072)	1	109184403	109189089	MSTRG.1558.1
1	2701298	292955427	Loin muscle area QTL (38072)	1	109185924	109189089	MSTRG.1558.2
1	2701298	292955427	Loin muscle area QTL (38072)	1	115698959	115734281	MSTRG.1813.1
1	2701298	292955427	Loin muscle area QTL (38072)	1	138258064	138262930	MSTRG.2297.1
1	2701298	292955427	Loin muscle area QTL (38072)	1	179788962	179799724	MSTRG.2773.1
1	2701298	292955427	Loin muscle area QTL (38072)	1	179796932	179799853	MSTRG.2773.2
1	2701298	292955427	Loin muscle area QTL (38072)	1	213147552	213195062	MSTRG.3379.1
1	2701298	292955427	Loin muscle area QTL (38072)	1	247060447	247069977	MSTRG.3931.1
1	2701298	292955427	Loin muscle area QTL (38072)	1	247062253	247065719	MSTRG.3931.2
1	2701298	292955427	Loin muscle area QTL (38072)	1	264223330	264237373	MSTRG.4184.1
1	2701298	292955427	Loin muscle area QTL (38072)	1	264223330	264237373	MSTRG.4184.2
1	2701298	292955427	Loin muscle area QTL (38072)	1	267187495	267188526	MSTRG.4258.2
1	2701298	292955427	Loin muscle area QTL (38072)	1	267187495	267206909	MSTRG.4258.1
1	2701298	292955427	Loin muscle area QTL (38072)	1	229871932	229955811	MSTRG.3631.1
1	2701298	292955427	Loin muscle area QTL (38072)	1	106933151	106963961	MSTRG.1497.1
1	2701298	292955427	Loin fat percentage QTL (38050)	1	7058679	7061189	MSTRG.131.1
1	2701298	292955427	Loin fat percentage QTL (38050)	1	14148364	14151438	MSTRG.306.1
1	2701298	292955427	Loin fat percentage QTL (38050)	1	16653403	16681491	MSTRG.319.1
1	2701298	292955427	Loin fat percentage QTL (38050)	1	16659399	16681491	MSTRG.319.2
1	2701298	292955427	Loin fat percentage QTL (38050)	1	30776372	30781149	MSTRG.572.1
1	2701298	292955427	Loin fat percentage QTL (38050)	1	43980633	43981357	MSTRG.761.1
1	2701298	292955427	Loin fat percentage QTL (38050)	1	51496270	51499483	MSTRG.834.1
1	2701298	292955427	Loin fat percentage QTL (38050)	1	52447424	52460077	MSTRG.852.1
1	2701298	292955427	Loin fat percentage QTL (38050)	1	107150104	107154187	MSTRG.1509.1
1	2701298	292955427	Loin fat percentage QTL (38050)	1	107150105	107154546	MSTRG.1509.2
1	2701298	292955427	Loin fat percentage QTL (38050)	1	109184403	109189089	MSTRG.1558.1
1	2701298	292955427	Loin fat percentage QTL (38050)	1	109185924	109189089	MSTRG.1558.2
1	2701298	292955427	Loin fat percentage QTL (38050)	1	115698959	115734281	MSTRG.1813.1
1	2701298	292955427	Loin fat percentage QTL (38050)	1	138258064	138262930	MSTRG.2297.1
1	2701298	292955427	Loin fat percentage QTL (38050)	1	179788962	179799724	MSTRG.2773.1
1	2701298	292955427	Loin fat percentage QTL (38050)	1	179796932	179799853	MSTRG.2773.2
1	2701298	292955427	Loin fat percentage QTL (38050)	1	213147552	213195062	MSTRG.3379.1
1	2701298	292955427	Loin fat percentage QTL (38050)	1	247060447	247069977	MSTRG.3931.1
1	2701298	292955427	Loin fat percentage QTL (38050)	1	247062253	247065719	MSTRG.3931.2
1	2701298	292955427	Loin fat percentage QTL (38050)	1	264223330	264237373	MSTRG.4184.1
1	2701298	292955427	Loin fat percentage QTL (38050)	1	264223330	264237373	MSTRG.4184.2
1	2701298	292955427	Loin fat percentage QTL (38050)	1	267187495	267188526	MSTRG.4258.2
1	2701298	292955427	Loin fat percentage QTL (38050)	1	267187495	267206909	MSTRG.4258.1
1	2701298	292955427	Loin fat percentage QTL (38050)	1	229871932	229955811	MSTRG.3631.1
1	2701298	292955427	Loin fat percentage QTL (38050)	1	106933151	106963961	MSTRG.1497.1
1	7964370	22514169	Water holding capacity QTL (3848)	1	14148364	14151438	MSTRG.306.1
1	7964370	22514169	Water holding capacity QTL (3848)	1	16653403	16681491	MSTRG.319.1
1	7964370	22514169	Water holding capacity QTL (3848)	1	16659399	16681491	MSTRG.319.2
1	7964370	16114132	Stearic acid content QTL (3111)	1	14148364	14151438	MSTRG.306.1
1	7964370	16114132	Palmitoleic acid content QTL (3109)	1	14148364	14151438	MSTRG.306.1
1	7964370	16114132	Melting point QTL (3123)	1	14148364	14151438	MSTRG.306.1
1	7964370	16114132	Palmitoleic acid content QTL (3118)	1	14148364	14151438	MSTRG.306.1
1	7964370	16114132	Stearic acid content QTL (3119)	1	14148364	14151438	MSTRG.306.1
1	7964370	252283830	Shoulder subcutaneous fat thickness QTL (5671)	1	14148364	14151438	MSTRG.306.1
1	7964370	252283830	Shoulder subcutaneous fat thickness QTL (5671)	1	16653403	16681491	MSTRG.319.1
1	7964370	252283830	Shoulder subcutaneous fat thickness QTL (5671)	1	16659399	16681491	MSTRG.319.2
1	7964370	252283830	Shoulder subcutaneous fat thickness QTL (5671)	1	30776372	30781149	MSTRG.572.1
1	7964370	252283830	Shoulder subcutaneous fat thickness QTL (5671)	1	43980633	43981357	MSTRG.761.1
1	7964370	252283830	Shoulder subcutaneous fat thickness QTL (5671)	1	51496270	51499483	MSTRG.834.1
1	7964370	252283830	Shoulder subcutaneous fat thickness QTL (5671)	1	52447424	52460077	MSTRG.852.1
1	7964370	252283830	Shoulder subcutaneous fat thickness QTL (5671)	1	107150104	107154187	MSTRG.1509.1
1	7964370	252283830	Shoulder subcutaneous fat thickness QTL (5671)	1	107150105	107154546	MSTRG.1509.2
1	7964370	252283830	Shoulder subcutaneous fat thickness QTL (5671)	1	109184403	109189089	MSTRG.1558.1
1	7964370	252283830	Shoulder subcutaneous fat thickness QTL (5671)	1	109185924	109189089	MSTRG.1558.2
1	7964370	252283830	Shoulder subcutaneous fat thickness QTL (5671)	1	115698959	115734281	MSTRG.1813.1
1	7964370	252283830	Shoulder subcutaneous fat thickness QTL (5671)	1	138258064	138262930	MSTRG.2297.1
1	7964370	252283830	Shoulder subcutaneous fat thickness QTL (5671)	1	179788962	179799724	MSTRG.2773.1
1	7964370	252283830	Shoulder subcutaneous fat thickness QTL (5671)	1	179796932	179799853	MSTRG.2773.2
1	7964370	252283830	Shoulder subcutaneous fat thickness QTL (5671)	1	213147552	213195062	MSTRG.3379.1
1	7964370	252283830	Shoulder subcutaneous fat thickness QTL (5671)	1	247060447	247069977	MSTRG.3931.1
1	7964370	252283830	Shoulder subcutaneous fat thickness QTL (5671)	1	247062253	247065719	MSTRG.3931.2
1	7964370	252283830	Shoulder subcutaneous fat thickness QTL (5671)	1	229871932	229955811	MSTRG.3631.1
1	7964370	252283830	Shoulder subcutaneous fat thickness QTL (5671)	1	106933151	106963961	MSTRG.1497.1
1	7964370	257944209	Average backfat thickness QTL (5670)	1	14148364	14151438	MSTRG.306.1
1	7964370	257944209	Average backfat thickness QTL (5670)	1	16653403	16681491	MSTRG.319.1
1	7964370	257944209	Average backfat thickness QTL (5670)	1	16659399	16681491	MSTRG.319.2
1	7964370	257944209	Average backfat thickness QTL (5670)	1	30776372	30781149	MSTRG.572.1
1	7964370	257944209	Average backfat thickness QTL (5670)	1	43980633	43981357	MSTRG.761.1
1	7964370	257944209	Average backfat thickness QTL (5670)	1	51496270	51499483	MSTRG.834.1
1	7964370	257944209	Average backfat thickness QTL (5670)	1	52447424	52460077	MSTRG.852.1
1	7964370	257944209	Average backfat thickness QTL (5670)	1	107150104	107154187	MSTRG.1509.1
1	7964370	257944209	Average backfat thickness QTL (5670)	1	107150105	107154546	MSTRG.1509.2
1	7964370	257944209	Average backfat thickness QTL (5670)	1	109184403	109189089	MSTRG.1558.1
1	7964370	257944209	Average backfat thickness QTL (5670)	1	109185924	109189089	MSTRG.1558.2
1	7964370	257944209	Average backfat thickness QTL (5670)	1	115698959	115734281	MSTRG.1813.1
1	7964370	257944209	Average backfat thickness QTL (5670)	1	138258064	138262930	MSTRG.2297.1
1	7964370	257944209	Average backfat thickness QTL (5670)	1	179788962	179799724	MSTRG.2773.1
1	7964370	257944209	Average backfat thickness QTL (5670)	1	179796932	179799853	MSTRG.2773.2
1	7964370	257944209	Average backfat thickness QTL (5670)	1	213147552	213195062	MSTRG.3379.1
1	7964370	257944209	Average backfat thickness QTL (5670)	1	247060447	247069977	MSTRG.3931.1
1	7964370	257944209	Average backfat thickness QTL (5670)	1	247062253	247065719	MSTRG.3931.2
1	7964370	257944209	Average backfat thickness QTL (5670)	1	229871932	229955811	MSTRG.3631.1
1	7964370	257944209	Average backfat thickness QTL (5670)	1	106933151	106963961	MSTRG.1497.1
1	7964370	292955427	Average daily gain QTL (5680)	1	14148364	14151438	MSTRG.306.1
1	7964370	292955427	Average daily gain QTL (5680)	1	16653403	16681491	MSTRG.319.1
1	7964370	292955427	Average daily gain QTL (5680)	1	16659399	16681491	MSTRG.319.2
1	7964370	292955427	Average daily gain QTL (5680)	1	30776372	30781149	MSTRG.572.1
1	7964370	292955427	Average daily gain QTL (5680)	1	43980633	43981357	MSTRG.761.1
1	7964370	292955427	Average daily gain QTL (5680)	1	51496270	51499483	MSTRG.834.1
1	7964370	292955427	Average daily gain QTL (5680)	1	52447424	52460077	MSTRG.852.1
1	7964370	292955427	Average daily gain QTL (5680)	1	107150104	107154187	MSTRG.1509.1
1	7964370	292955427	Average daily gain QTL (5680)	1	107150105	107154546	MSTRG.1509.2
1	7964370	292955427	Average daily gain QTL (5680)	1	109184403	109189089	MSTRG.1558.1
1	7964370	292955427	Average daily gain QTL (5680)	1	109185924	109189089	MSTRG.1558.2
1	7964370	292955427	Average daily gain QTL (5680)	1	115698959	115734281	MSTRG.1813.1
1	7964370	292955427	Average daily gain QTL (5680)	1	138258064	138262930	MSTRG.2297.1
1	7964370	292955427	Average daily gain QTL (5680)	1	179788962	179799724	MSTRG.2773.1
1	7964370	292955427	Average daily gain QTL (5680)	1	179796932	179799853	MSTRG.2773.2
1	7964370	292955427	Average daily gain QTL (5680)	1	213147552	213195062	MSTRG.3379.1
1	7964370	292955427	Average daily gain QTL (5680)	1	247060447	247069977	MSTRG.3931.1
1	7964370	292955427	Average daily gain QTL (5680)	1	247062253	247065719	MSTRG.3931.2
1	7964370	292955427	Average daily gain QTL (5680)	1	264223330	264237373	MSTRG.4184.1
1	7964370	292955427	Average daily gain QTL (5680)	1	264223330	264237373	MSTRG.4184.2
1	7964370	292955427	Average daily gain QTL (5680)	1	267187495	267188526	MSTRG.4258.2
1	7964370	292955427	Average daily gain QTL (5680)	1	267187495	267206909	MSTRG.4258.1
1	7964370	292955427	Average daily gain QTL (5680)	1	229871932	229955811	MSTRG.3631.1
1	7964370	292955427	Average daily gain QTL (5680)	1	106933151	106963961	MSTRG.1497.1
1	8025530	292730648	Shoulder subcutaneous fat thickness QTL (21209)	1	14148364	14151438	MSTRG.306.1
1	8025530	292730648	Shoulder subcutaneous fat thickness QTL (21209)	1	16653403	16681491	MSTRG.319.1
1	8025530	292730648	Shoulder subcutaneous fat thickness QTL (21209)	1	16659399	16681491	MSTRG.319.2
1	8025530	292730648	Shoulder subcutaneous fat thickness QTL (21209)	1	30776372	30781149	MSTRG.572.1
1	8025530	292730648	Shoulder subcutaneous fat thickness QTL (21209)	1	43980633	43981357	MSTRG.761.1
1	8025530	292730648	Shoulder subcutaneous fat thickness QTL (21209)	1	51496270	51499483	MSTRG.834.1
1	8025530	292730648	Shoulder subcutaneous fat thickness QTL (21209)	1	52447424	52460077	MSTRG.852.1
1	8025530	292730648	Shoulder subcutaneous fat thickness QTL (21209)	1	107150104	107154187	MSTRG.1509.1
1	8025530	292730648	Shoulder subcutaneous fat thickness QTL (21209)	1	107150105	107154546	MSTRG.1509.2
1	8025530	292730648	Shoulder subcutaneous fat thickness QTL (21209)	1	109184403	109189089	MSTRG.1558.1
1	8025530	292730648	Shoulder subcutaneous fat thickness QTL (21209)	1	109185924	109189089	MSTRG.1558.2
1	8025530	292730648	Shoulder subcutaneous fat thickness QTL (21209)	1	115698959	115734281	MSTRG.1813.1
1	8025530	292730648	Shoulder subcutaneous fat thickness QTL (21209)	1	138258064	138262930	MSTRG.2297.1
1	8025530	292730648	Shoulder subcutaneous fat thickness QTL (21209)	1	179788962	179799724	MSTRG.2773.1
1	8025530	292730648	Shoulder subcutaneous fat thickness QTL (21209)	1	179796932	179799853	MSTRG.2773.2
1	8025530	292730648	Shoulder subcutaneous fat thickness QTL (21209)	1	213147552	213195062	MSTRG.3379.1
1	8025530	292730648	Shoulder subcutaneous fat thickness QTL (21209)	1	247060447	247069977	MSTRG.3931.1
1	8025530	292730648	Shoulder subcutaneous fat thickness QTL (21209)	1	247062253	247065719	MSTRG.3931.2
1	8025530	292730648	Shoulder subcutaneous fat thickness QTL (21209)	1	264223330	264237373	MSTRG.4184.1
1	8025530	292730648	Shoulder subcutaneous fat thickness QTL (21209)	1	264223330	264237373	MSTRG.4184.2
1	8025530	292730648	Shoulder subcutaneous fat thickness QTL (21209)	1	267187495	267188526	MSTRG.4258.2
1	8025530	292730648	Shoulder subcutaneous fat thickness QTL (21209)	1	267187495	267206909	MSTRG.4258.1
1	8025530	292730648	Shoulder subcutaneous fat thickness QTL (21209)	1	229871932	229955811	MSTRG.3631.1
1	8025530	292730648	Shoulder subcutaneous fat thickness QTL (21209)	1	106933151	106963961	MSTRG.1497.1
1	10067182	292041505	Backfat at last rib QTL (21208)	1	14148364	14151438	MSTRG.306.1
1	10067182	292041505	Backfat at last rib QTL (21208)	1	16653403	16681491	MSTRG.319.1
1	10067182	292041505	Backfat at last rib QTL (21208)	1	16659399	16681491	MSTRG.319.2
1	10067182	292041505	Backfat at last rib QTL (21208)	1	30776372	30781149	MSTRG.572.1
1	10067182	292041505	Backfat at last rib QTL (21208)	1	43980633	43981357	MSTRG.761.1
1	10067182	292041505	Backfat at last rib QTL (21208)	1	51496270	51499483	MSTRG.834.1
1	10067182	292041505	Backfat at last rib QTL (21208)	1	52447424	52460077	MSTRG.852.1
1	10067182	292041505	Backfat at last rib QTL (21208)	1	107150104	107154187	MSTRG.1509.1
1	10067182	292041505	Backfat at last rib QTL (21208)	1	107150105	107154546	MSTRG.1509.2
1	10067182	292041505	Backfat at last rib QTL (21208)	1	109184403	109189089	MSTRG.1558.1
1	10067182	292041505	Backfat at last rib QTL (21208)	1	109185924	109189089	MSTRG.1558.2
1	10067182	292041505	Backfat at last rib QTL (21208)	1	115698959	115734281	MSTRG.1813.1
1	10067182	292041505	Backfat at last rib QTL (21208)	1	138258064	138262930	MSTRG.2297.1
1	10067182	292041505	Backfat at last rib QTL (21208)	1	179788962	179799724	MSTRG.2773.1
1	10067182	292041505	Backfat at last rib QTL (21208)	1	179796932	179799853	MSTRG.2773.2
1	10067182	292041505	Backfat at last rib QTL (21208)	1	213147552	213195062	MSTRG.3379.1
1	10067182	292041505	Backfat at last rib QTL (21208)	1	247060447	247069977	MSTRG.3931.1
1	10067182	292041505	Backfat at last rib QTL (21208)	1	247062253	247065719	MSTRG.3931.2
1	10067182	292041505	Backfat at last rib QTL (21208)	1	264223330	264237373	MSTRG.4184.1
1	10067182	292041505	Backfat at last rib QTL (21208)	1	264223330	264237373	MSTRG.4184.2
1	10067182	292041505	Backfat at last rib QTL (21208)	1	267187495	267188526	MSTRG.4258.2
1	10067182	292041505	Backfat at last rib QTL (21208)	1	267187495	267206909	MSTRG.4258.1
1	10067182	292041505	Backfat at last rib QTL (21208)	1	229871932	229955811	MSTRG.3631.1
1	10067182	292041505	Backfat at last rib QTL (21208)	1	106933151	106963961	MSTRG.1497.1
1	10357591	22164712	Loin muscle area QTL (21704)	1	14148364	14151438	MSTRG.306.1
1	10357591	22164712	Loin muscle area QTL (21704)	1	16653403	16681491	MSTRG.319.1
1	10357591	22164712	Loin muscle area QTL (21704)	1	16659399	16681491	MSTRG.319.2
1	10707403	16114132	Salmonella count in liver QTL (11554)	1	14148364	14151438	MSTRG.306.1
1	10707403	16114132	Average daily gain QTL (319)	1	14148364	14151438	MSTRG.306.1
1	11871848	116126341	Drip loss QTL (8411)	1	14148364	14151438	MSTRG.306.1
1	11871848	116126341	Drip loss QTL (8411)	1	16653403	16681491	MSTRG.319.1
1	11871848	116126341	Drip loss QTL (8411)	1	16659399	16681491	MSTRG.319.2
1	11871848	116126341	Drip loss QTL (8411)	1	30776372	30781149	MSTRG.572.1
1	11871848	116126341	Drip loss QTL (8411)	1	43980633	43981357	MSTRG.761.1
1	11871848	116126341	Drip loss QTL (8411)	1	51496270	51499483	MSTRG.834.1
1	11871848	116126341	Drip loss QTL (8411)	1	52447424	52460077	MSTRG.852.1
1	11871848	116126341	Drip loss QTL (8411)	1	107150104	107154187	MSTRG.1509.1
1	11871848	116126341	Drip loss QTL (8411)	1	107150105	107154546	MSTRG.1509.2
1	11871848	116126341	Drip loss QTL (8411)	1	109184403	109189089	MSTRG.1558.1
1	11871848	116126341	Drip loss QTL (8411)	1	109185924	109189089	MSTRG.1558.2
1	11871848	116126341	Drip loss QTL (8411)	1	115698959	115734281	MSTRG.1813.1
1	11871848	116126341	Drip loss QTL (8411)	1	106933151	106963961	MSTRG.1497.1
1	11871848	116126341	Drip loss QTL (8562)	1	14148364	14151438	MSTRG.306.1
1	11871848	116126341	Drip loss QTL (8562)	1	16653403	16681491	MSTRG.319.1
1	11871848	116126341	Drip loss QTL (8562)	1	16659399	16681491	MSTRG.319.2
1	11871848	116126341	Drip loss QTL (8562)	1	30776372	30781149	MSTRG.572.1
1	11871848	116126341	Drip loss QTL (8562)	1	43980633	43981357	MSTRG.761.1
1	11871848	116126341	Drip loss QTL (8562)	1	51496270	51499483	MSTRG.834.1
1	11871848	116126341	Drip loss QTL (8562)	1	52447424	52460077	MSTRG.852.1
1	11871848	116126341	Drip loss QTL (8562)	1	107150104	107154187	MSTRG.1509.1
1	11871848	116126341	Drip loss QTL (8562)	1	107150105	107154546	MSTRG.1509.2
1	11871848	116126341	Drip loss QTL (8562)	1	109184403	109189089	MSTRG.1558.1
1	11871848	116126341	Drip loss QTL (8562)	1	109185924	109189089	MSTRG.1558.2
1	11871848	116126341	Drip loss QTL (8562)	1	115698959	115734281	MSTRG.1813.1
1	11871848	116126341	Drip loss QTL (8562)	1	106933151	106963961	MSTRG.1497.1
1	11871848	116126341	Drip loss QTL (8012)	1	14148364	14151438	MSTRG.306.1
1	11871848	116126341	Drip loss QTL (8012)	1	16653403	16681491	MSTRG.319.1
1	11871848	116126341	Drip loss QTL (8012)	1	16659399	16681491	MSTRG.319.2
1	11871848	116126341	Drip loss QTL (8012)	1	30776372	30781149	MSTRG.572.1
1	11871848	116126341	Drip loss QTL (8012)	1	43980633	43981357	MSTRG.761.1
1	11871848	116126341	Drip loss QTL (8012)	1	51496270	51499483	MSTRG.834.1
1	11871848	116126341	Drip loss QTL (8012)	1	52447424	52460077	MSTRG.852.1
1	11871848	116126341	Drip loss QTL (8012)	1	107150104	107154187	MSTRG.1509.1
1	11871848	116126341	Drip loss QTL (8012)	1	107150105	107154546	MSTRG.1509.2
1	11871848	116126341	Drip loss QTL (8012)	1	109184403	109189089	MSTRG.1558.1
1	11871848	116126341	Drip loss QTL (8012)	1	109185924	109189089	MSTRG.1558.2
1	11871848	116126341	Drip loss QTL (8012)	1	115698959	115734281	MSTRG.1813.1
1	11871848	116126341	Drip loss QTL (8012)	1	106933151	106963961	MSTRG.1497.1
1	11871848	116126341	Drip loss QTL (8043)	1	14148364	14151438	MSTRG.306.1
1	11871848	116126341	Drip loss QTL (8043)	1	16653403	16681491	MSTRG.319.1
1	11871848	116126341	Drip loss QTL (8043)	1	16659399	16681491	MSTRG.319.2
1	11871848	116126341	Drip loss QTL (8043)	1	30776372	30781149	MSTRG.572.1
1	11871848	116126341	Drip loss QTL (8043)	1	43980633	43981357	MSTRG.761.1
1	11871848	116126341	Drip loss QTL (8043)	1	51496270	51499483	MSTRG.834.1
1	11871848	116126341	Drip loss QTL (8043)	1	52447424	52460077	MSTRG.852.1
1	11871848	116126341	Drip loss QTL (8043)	1	107150104	107154187	MSTRG.1509.1
1	11871848	116126341	Drip loss QTL (8043)	1	107150105	107154546	MSTRG.1509.2
1	11871848	116126341	Drip loss QTL (8043)	1	109184403	109189089	MSTRG.1558.1
1	11871848	116126341	Drip loss QTL (8043)	1	109185924	109189089	MSTRG.1558.2
1	11871848	116126341	Drip loss QTL (8043)	1	115698959	115734281	MSTRG.1813.1
1	11871848	116126341	Drip loss QTL (8043)	1	106933151	106963961	MSTRG.1497.1
1	11871848	116126341	Drip loss QTL (8110)	1	14148364	14151438	MSTRG.306.1
1	11871848	116126341	Drip loss QTL (8110)	1	16653403	16681491	MSTRG.319.1
1	11871848	116126341	Drip loss QTL (8110)	1	16659399	16681491	MSTRG.319.2
1	11871848	116126341	Drip loss QTL (8110)	1	30776372	30781149	MSTRG.572.1
1	11871848	116126341	Drip loss QTL (8110)	1	43980633	43981357	MSTRG.761.1
1	11871848	116126341	Drip loss QTL (8110)	1	51496270	51499483	MSTRG.834.1
1	11871848	116126341	Drip loss QTL (8110)	1	52447424	52460077	MSTRG.852.1
1	11871848	116126341	Drip loss QTL (8110)	1	107150104	107154187	MSTRG.1509.1
1	11871848	116126341	Drip loss QTL (8110)	1	107150105	107154546	MSTRG.1509.2
1	11871848	116126341	Drip loss QTL (8110)	1	109184403	109189089	MSTRG.1558.1
1	11871848	116126341	Drip loss QTL (8110)	1	109185924	109189089	MSTRG.1558.2
1	11871848	116126341	Drip loss QTL (8110)	1	115698959	115734281	MSTRG.1813.1
1	11871848	116126341	Drip loss QTL (8110)	1	106933151	106963961	MSTRG.1497.1
1	11871848	116126341	Drip loss QTL (8154)	1	14148364	14151438	MSTRG.306.1
1	11871848	116126341	Drip loss QTL (8154)	1	16653403	16681491	MSTRG.319.1
1	11871848	116126341	Drip loss QTL (8154)	1	16659399	16681491	MSTRG.319.2
1	11871848	116126341	Drip loss QTL (8154)	1	30776372	30781149	MSTRG.572.1
1	11871848	116126341	Drip loss QTL (8154)	1	43980633	43981357	MSTRG.761.1
1	11871848	116126341	Drip loss QTL (8154)	1	51496270	51499483	MSTRG.834.1
1	11871848	116126341	Drip loss QTL (8154)	1	52447424	52460077	MSTRG.852.1
1	11871848	116126341	Drip loss QTL (8154)	1	107150104	107154187	MSTRG.1509.1
1	11871848	116126341	Drip loss QTL (8154)	1	107150105	107154546	MSTRG.1509.2
1	11871848	116126341	Drip loss QTL (8154)	1	109184403	109189089	MSTRG.1558.1
1	11871848	116126341	Drip loss QTL (8154)	1	109185924	109189089	MSTRG.1558.2
1	11871848	116126341	Drip loss QTL (8154)	1	115698959	115734281	MSTRG.1813.1
1	11871848	116126341	Drip loss QTL (8154)	1	106933151	106963961	MSTRG.1497.1
1	11871848	116126341	Drip loss QTL (8349)	1	14148364	14151438	MSTRG.306.1
1	11871848	116126341	Drip loss QTL (8349)	1	16653403	16681491	MSTRG.319.1
1	11871848	116126341	Drip loss QTL (8349)	1	16659399	16681491	MSTRG.319.2
1	11871848	116126341	Drip loss QTL (8349)	1	30776372	30781149	MSTRG.572.1
1	11871848	116126341	Drip loss QTL (8349)	1	43980633	43981357	MSTRG.761.1
1	11871848	116126341	Drip loss QTL (8349)	1	51496270	51499483	MSTRG.834.1
1	11871848	116126341	Drip loss QTL (8349)	1	52447424	52460077	MSTRG.852.1
1	11871848	116126341	Drip loss QTL (8349)	1	107150104	107154187	MSTRG.1509.1
1	11871848	116126341	Drip loss QTL (8349)	1	107150105	107154546	MSTRG.1509.2
1	11871848	116126341	Drip loss QTL (8349)	1	109184403	109189089	MSTRG.1558.1
1	11871848	116126341	Drip loss QTL (8349)	1	109185924	109189089	MSTRG.1558.2
1	11871848	116126341	Drip loss QTL (8349)	1	115698959	115734281	MSTRG.1813.1
1	11871848	116126341	Drip loss QTL (8349)	1	106933151	106963961	MSTRG.1497.1
1	11871848	116126341	Drip loss QTL (7751)	1	14148364	14151438	MSTRG.306.1
1	11871848	116126341	Drip loss QTL (7751)	1	16653403	16681491	MSTRG.319.1
1	11871848	116126341	Drip loss QTL (7751)	1	16659399	16681491	MSTRG.319.2
1	11871848	116126341	Drip loss QTL (7751)	1	30776372	30781149	MSTRG.572.1
1	11871848	116126341	Drip loss QTL (7751)	1	43980633	43981357	MSTRG.761.1
1	11871848	116126341	Drip loss QTL (7751)	1	51496270	51499483	MSTRG.834.1
1	11871848	116126341	Drip loss QTL (7751)	1	52447424	52460077	MSTRG.852.1
1	11871848	116126341	Drip loss QTL (7751)	1	107150104	107154187	MSTRG.1509.1
1	11871848	116126341	Drip loss QTL (7751)	1	107150105	107154546	MSTRG.1509.2
1	11871848	116126341	Drip loss QTL (7751)	1	109184403	109189089	MSTRG.1558.1
1	11871848	116126341	Drip loss QTL (7751)	1	109185924	109189089	MSTRG.1558.2
1	11871848	116126341	Drip loss QTL (7751)	1	115698959	115734281	MSTRG.1813.1
1	11871848	116126341	Drip loss QTL (7751)	1	106933151	106963961	MSTRG.1497.1
1	11871848	116126341	Drip loss QTL (7763)	1	14148364	14151438	MSTRG.306.1
1	11871848	116126341	Drip loss QTL (7763)	1	16653403	16681491	MSTRG.319.1
1	11871848	116126341	Drip loss QTL (7763)	1	16659399	16681491	MSTRG.319.2
1	11871848	116126341	Drip loss QTL (7763)	1	30776372	30781149	MSTRG.572.1
1	11871848	116126341	Drip loss QTL (7763)	1	43980633	43981357	MSTRG.761.1
1	11871848	116126341	Drip loss QTL (7763)	1	51496270	51499483	MSTRG.834.1
1	11871848	116126341	Drip loss QTL (7763)	1	52447424	52460077	MSTRG.852.1
1	11871848	116126341	Drip loss QTL (7763)	1	107150104	107154187	MSTRG.1509.1
1	11871848	116126341	Drip loss QTL (7763)	1	107150105	107154546	MSTRG.1509.2
1	11871848	116126341	Drip loss QTL (7763)	1	109184403	109189089	MSTRG.1558.1
1	11871848	116126341	Drip loss QTL (7763)	1	109185924	109189089	MSTRG.1558.2
1	11871848	116126341	Drip loss QTL (7763)	1	115698959	115734281	MSTRG.1813.1
1	11871848	116126341	Drip loss QTL (7763)	1	106933151	106963961	MSTRG.1497.1
1	11871848	116126341	Drip loss QTL (7776)	1	14148364	14151438	MSTRG.306.1
1	11871848	116126341	Drip loss QTL (7776)	1	16653403	16681491	MSTRG.319.1
1	11871848	116126341	Drip loss QTL (7776)	1	16659399	16681491	MSTRG.319.2
1	11871848	116126341	Drip loss QTL (7776)	1	30776372	30781149	MSTRG.572.1
1	11871848	116126341	Drip loss QTL (7776)	1	43980633	43981357	MSTRG.761.1
1	11871848	116126341	Drip loss QTL (7776)	1	51496270	51499483	MSTRG.834.1
1	11871848	116126341	Drip loss QTL (7776)	1	52447424	52460077	MSTRG.852.1
1	11871848	116126341	Drip loss QTL (7776)	1	107150104	107154187	MSTRG.1509.1
1	11871848	116126341	Drip loss QTL (7776)	1	107150105	107154546	MSTRG.1509.2
1	11871848	116126341	Drip loss QTL (7776)	1	109184403	109189089	MSTRG.1558.1
1	11871848	116126341	Drip loss QTL (7776)	1	109185924	109189089	MSTRG.1558.2
1	11871848	116126341	Drip loss QTL (7776)	1	115698959	115734281	MSTRG.1813.1
1	11871848	116126341	Drip loss QTL (7776)	1	106933151	106963961	MSTRG.1497.1
1	11871848	116126341	Drip loss QTL (7815)	1	14148364	14151438	MSTRG.306.1
1	11871848	116126341	Drip loss QTL (7815)	1	16653403	16681491	MSTRG.319.1
1	11871848	116126341	Drip loss QTL (7815)	1	16659399	16681491	MSTRG.319.2
1	11871848	116126341	Drip loss QTL (7815)	1	30776372	30781149	MSTRG.572.1
1	11871848	116126341	Drip loss QTL (7815)	1	43980633	43981357	MSTRG.761.1
1	11871848	116126341	Drip loss QTL (7815)	1	51496270	51499483	MSTRG.834.1
1	11871848	116126341	Drip loss QTL (7815)	1	52447424	52460077	MSTRG.852.1
1	11871848	116126341	Drip loss QTL (7815)	1	107150104	107154187	MSTRG.1509.1
1	11871848	116126341	Drip loss QTL (7815)	1	107150105	107154546	MSTRG.1509.2
1	11871848	116126341	Drip loss QTL (7815)	1	109184403	109189089	MSTRG.1558.1
1	11871848	116126341	Drip loss QTL (7815)	1	109185924	109189089	MSTRG.1558.2
1	11871848	116126341	Drip loss QTL (7815)	1	115698959	115734281	MSTRG.1813.1
1	11871848	116126341	Drip loss QTL (7815)	1	106933151	106963961	MSTRG.1497.1
1	14013581	14153111	Drip loss QTL (7827)	1	14148364	14151438	MSTRG.306.1
1	14013581	14153111	Drip loss QTL (7829)	1	14148364	14151438	MSTRG.306.1
1	14013581	14153111	Drip loss QTL (7994)	1	14148364	14151438	MSTRG.306.1
1	14013581	14153111	Drip loss QTL (8024)	1	14148364	14151438	MSTRG.306.1
1	14013581	14153111	Drip loss QTL (8034)	1	14148364	14151438	MSTRG.306.1
1	15380966	242497921	Melanoma susceptibility QTL (7567)	1	16653403	16681491	MSTRG.319.1
1	15380966	242497921	Melanoma susceptibility QTL (7567)	1	16659399	16681491	MSTRG.319.2
1	15380966	242497921	Melanoma susceptibility QTL (7567)	1	30776372	30781149	MSTRG.572.1
1	15380966	242497921	Melanoma susceptibility QTL (7567)	1	43980633	43981357	MSTRG.761.1
1	15380966	242497921	Melanoma susceptibility QTL (7567)	1	51496270	51499483	MSTRG.834.1
1	15380966	242497921	Melanoma susceptibility QTL (7567)	1	52447424	52460077	MSTRG.852.1
1	15380966	242497921	Melanoma susceptibility QTL (7567)	1	107150104	107154187	MSTRG.1509.1
1	15380966	242497921	Melanoma susceptibility QTL (7567)	1	107150105	107154546	MSTRG.1509.2
1	15380966	242497921	Melanoma susceptibility QTL (7567)	1	109184403	109189089	MSTRG.1558.1
1	15380966	242497921	Melanoma susceptibility QTL (7567)	1	109185924	109189089	MSTRG.1558.2
1	15380966	242497921	Melanoma susceptibility QTL (7567)	1	115698959	115734281	MSTRG.1813.1
1	15380966	242497921	Melanoma susceptibility QTL (7567)	1	138258064	138262930	MSTRG.2297.1
1	15380966	242497921	Melanoma susceptibility QTL (7567)	1	179788962	179799724	MSTRG.2773.1
1	15380966	242497921	Melanoma susceptibility QTL (7567)	1	179796932	179799853	MSTRG.2773.2
1	15380966	242497921	Melanoma susceptibility QTL (7567)	1	213147552	213195062	MSTRG.3379.1
1	15380966	242497921	Melanoma susceptibility QTL (7567)	1	229871932	229955811	MSTRG.3631.1
1	15380966	242497921	Melanoma susceptibility QTL (7567)	1	106933151	106963961	MSTRG.1497.1
1	15454564	69718238	Leaf fat weight QTL (3863)	1	16653403	16681491	MSTRG.319.1
1	15454564	69718238	Leaf fat weight QTL (3863)	1	16659399	16681491	MSTRG.319.2
1	15454564	69718238	Leaf fat weight QTL (3863)	1	30776372	30781149	MSTRG.572.1
1	15454564	69718238	Leaf fat weight QTL (3863)	1	43980633	43981357	MSTRG.761.1
1	15454564	69718238	Leaf fat weight QTL (3863)	1	51496270	51499483	MSTRG.834.1
1	15454564	69718238	Leaf fat weight QTL (3863)	1	52447424	52460077	MSTRG.852.1
1	16114132	289571736	Body weight (birth) QTL (5232)	1	16653403	16681491	MSTRG.319.1
1	16114132	289571736	Body weight (birth) QTL (5232)	1	16659399	16681491	MSTRG.319.2
1	16114132	289571736	Body weight (birth) QTL (5232)	1	30776372	30781149	MSTRG.572.1
1	16114132	289571736	Body weight (birth) QTL (5232)	1	43980633	43981357	MSTRG.761.1
1	16114132	289571736	Body weight (birth) QTL (5232)	1	51496270	51499483	MSTRG.834.1
1	16114132	289571736	Body weight (birth) QTL (5232)	1	52447424	52460077	MSTRG.852.1
1	16114132	289571736	Body weight (birth) QTL (5232)	1	107150104	107154187	MSTRG.1509.1
1	16114132	289571736	Body weight (birth) QTL (5232)	1	107150105	107154546	MSTRG.1509.2
1	16114132	289571736	Body weight (birth) QTL (5232)	1	109184403	109189089	MSTRG.1558.1
1	16114132	289571736	Body weight (birth) QTL (5232)	1	109185924	109189089	MSTRG.1558.2
1	16114132	289571736	Body weight (birth) QTL (5232)	1	115698959	115734281	MSTRG.1813.1
1	16114132	289571736	Body weight (birth) QTL (5232)	1	138258064	138262930	MSTRG.2297.1
1	16114132	289571736	Body weight (birth) QTL (5232)	1	179788962	179799724	MSTRG.2773.1
1	16114132	289571736	Body weight (birth) QTL (5232)	1	179796932	179799853	MSTRG.2773.2
1	16114132	289571736	Body weight (birth) QTL (5232)	1	213147552	213195062	MSTRG.3379.1
1	16114132	289571736	Body weight (birth) QTL (5232)	1	247060447	247069977	MSTRG.3931.1
1	16114132	289571736	Body weight (birth) QTL (5232)	1	247062253	247065719	MSTRG.3931.2
1	16114132	289571736	Body weight (birth) QTL (5232)	1	264223330	264237373	MSTRG.4184.1
1	16114132	289571736	Body weight (birth) QTL (5232)	1	264223330	264237373	MSTRG.4184.2
1	16114132	289571736	Body weight (birth) QTL (5232)	1	267187495	267188526	MSTRG.4258.2
1	16114132	289571736	Body weight (birth) QTL (5232)	1	267187495	267206909	MSTRG.4258.1
1	16114132	289571736	Body weight (birth) QTL (5232)	1	229871932	229955811	MSTRG.3631.1
1	16114132	289571736	Body weight (birth) QTL (5232)	1	106933151	106963961	MSTRG.1497.1
1	16114132	62261447	Percentage type IIa fibers QTL (7015)	1	16653403	16681491	MSTRG.319.1
1	16114132	62261447	Percentage type IIa fibers QTL (7015)	1	16659399	16681491	MSTRG.319.2
1	16114132	62261447	Percentage type IIa fibers QTL (7015)	1	30776372	30781149	MSTRG.572.1
1	16114132	62261447	Percentage type IIa fibers QTL (7015)	1	43980633	43981357	MSTRG.761.1
1	16114132	62261447	Percentage type IIa fibers QTL (7015)	1	51496270	51499483	MSTRG.834.1
1	16114132	62261447	Percentage type IIa fibers QTL (7015)	1	52447424	52460077	MSTRG.852.1
1	16114132	20064508	Red cell distribution width QTL (12284)	1	16653403	16681491	MSTRG.319.1
1	16114132	20064508	Red cell distribution width QTL (12284)	1	16659399	16681491	MSTRG.319.2
1	16114132	36144885	PH for Longissmus dorsi QTL (2787)	1	16653403	16681491	MSTRG.319.1
1	16114132	36144885	PH for Longissmus dorsi QTL (2787)	1	16659399	16681491	MSTRG.319.2
1	16114132	36144885	PH for Longissmus dorsi QTL (2787)	1	30776372	30781149	MSTRG.572.1
1	16114132	22514169	Neck weight QTL (2841)	1	16653403	16681491	MSTRG.319.1
1	16114132	22514169	Neck weight QTL (2841)	1	16659399	16681491	MSTRG.319.2
1	16114132	52874641	Average daily gain QTL (16844)	1	16653403	16681491	MSTRG.319.1
1	16114132	52874641	Average daily gain QTL (16844)	1	16659399	16681491	MSTRG.319.2
1	16114132	52874641	Average daily gain QTL (16844)	1	30776372	30781149	MSTRG.572.1
1	16114132	52874641	Average daily gain QTL (16844)	1	43980633	43981357	MSTRG.761.1
1	16114132	52874641	Average daily gain QTL (16844)	1	51496270	51499483	MSTRG.834.1
1	16114132	52874641	Average daily gain QTL (16844)	1	52447424	52460077	MSTRG.852.1
1	16114132	52874641	Ham weight QTL (868)	1	16653403	16681491	MSTRG.319.1
1	16114132	52874641	Ham weight QTL (868)	1	16659399	16681491	MSTRG.319.2
1	16114132	52874641	Ham weight QTL (868)	1	30776372	30781149	MSTRG.572.1
1	16114132	52874641	Ham weight QTL (868)	1	43980633	43981357	MSTRG.761.1
1	16114132	52874641	Ham weight QTL (868)	1	51496270	51499483	MSTRG.834.1
1	16114132	52874641	Ham weight QTL (868)	1	52447424	52460077	MSTRG.852.1
1	16114132	252283830	Belly meat content QTL (5679)	1	16653403	16681491	MSTRG.319.1
1	16114132	252283830	Belly meat content QTL (5679)	1	16659399	16681491	MSTRG.319.2
1	16114132	252283830	Belly meat content QTL (5679)	1	30776372	30781149	MSTRG.572.1
1	16114132	252283830	Belly meat content QTL (5679)	1	43980633	43981357	MSTRG.761.1
1	16114132	252283830	Belly meat content QTL (5679)	1	51496270	51499483	MSTRG.834.1
1	16114132	252283830	Belly meat content QTL (5679)	1	52447424	52460077	MSTRG.852.1
1	16114132	252283830	Belly meat content QTL (5679)	1	107150104	107154187	MSTRG.1509.1
1	16114132	252283830	Belly meat content QTL (5679)	1	107150105	107154546	MSTRG.1509.2
1	16114132	252283830	Belly meat content QTL (5679)	1	109184403	109189089	MSTRG.1558.1
1	16114132	252283830	Belly meat content QTL (5679)	1	109185924	109189089	MSTRG.1558.2
1	16114132	252283830	Belly meat content QTL (5679)	1	115698959	115734281	MSTRG.1813.1
1	16114132	252283830	Belly meat content QTL (5679)	1	138258064	138262930	MSTRG.2297.1
1	16114132	252283830	Belly meat content QTL (5679)	1	179788962	179799724	MSTRG.2773.1
1	16114132	252283830	Belly meat content QTL (5679)	1	179796932	179799853	MSTRG.2773.2
1	16114132	252283830	Belly meat content QTL (5679)	1	213147552	213195062	MSTRG.3379.1
1	16114132	252283830	Belly meat content QTL (5679)	1	247060447	247069977	MSTRG.3931.1
1	16114132	252283830	Belly meat content QTL (5679)	1	247062253	247065719	MSTRG.3931.2
1	16114132	252283830	Belly meat content QTL (5679)	1	229871932	229955811	MSTRG.3631.1
1	16114132	252283830	Belly meat content QTL (5679)	1	106933151	106963961	MSTRG.1497.1
1	16114132	252283830	Backfat at last rib QTL (5674)	1	16653403	16681491	MSTRG.319.1
1	16114132	252283830	Backfat at last rib QTL (5674)	1	16659399	16681491	MSTRG.319.2
1	16114132	252283830	Backfat at last rib QTL (5674)	1	30776372	30781149	MSTRG.572.1
1	16114132	252283830	Backfat at last rib QTL (5674)	1	43980633	43981357	MSTRG.761.1
1	16114132	252283830	Backfat at last rib QTL (5674)	1	51496270	51499483	MSTRG.834.1
1	16114132	252283830	Backfat at last rib QTL (5674)	1	52447424	52460077	MSTRG.852.1
1	16114132	252283830	Backfat at last rib QTL (5674)	1	107150104	107154187	MSTRG.1509.1
1	16114132	252283830	Backfat at last rib QTL (5674)	1	107150105	107154546	MSTRG.1509.2
1	16114132	252283830	Backfat at last rib QTL (5674)	1	109184403	109189089	MSTRG.1558.1
1	16114132	252283830	Backfat at last rib QTL (5674)	1	109185924	109189089	MSTRG.1558.2
1	16114132	252283830	Backfat at last rib QTL (5674)	1	115698959	115734281	MSTRG.1813.1
1	16114132	252283830	Backfat at last rib QTL (5674)	1	138258064	138262930	MSTRG.2297.1
1	16114132	252283830	Backfat at last rib QTL (5674)	1	179788962	179799724	MSTRG.2773.1
1	16114132	252283830	Backfat at last rib QTL (5674)	1	179796932	179799853	MSTRG.2773.2
1	16114132	252283830	Backfat at last rib QTL (5674)	1	213147552	213195062	MSTRG.3379.1
1	16114132	252283830	Backfat at last rib QTL (5674)	1	247060447	247069977	MSTRG.3931.1
1	16114132	252283830	Backfat at last rib QTL (5674)	1	247062253	247065719	MSTRG.3931.2
1	16114132	252283830	Backfat at last rib QTL (5674)	1	229871932	229955811	MSTRG.3631.1
1	16114132	252283830	Backfat at last rib QTL (5674)	1	106933151	106963961	MSTRG.1497.1
1	16114132	252283830	Estimated carcass lean content QTL (5678)	1	16653403	16681491	MSTRG.319.1
1	16114132	252283830	Estimated carcass lean content QTL (5678)	1	16659399	16681491	MSTRG.319.2
1	16114132	252283830	Estimated carcass lean content QTL (5678)	1	30776372	30781149	MSTRG.572.1
1	16114132	252283830	Estimated carcass lean content QTL (5678)	1	43980633	43981357	MSTRG.761.1
1	16114132	252283830	Estimated carcass lean content QTL (5678)	1	51496270	51499483	MSTRG.834.1
1	16114132	252283830	Estimated carcass lean content QTL (5678)	1	52447424	52460077	MSTRG.852.1
1	16114132	252283830	Estimated carcass lean content QTL (5678)	1	107150104	107154187	MSTRG.1509.1
1	16114132	252283830	Estimated carcass lean content QTL (5678)	1	107150105	107154546	MSTRG.1509.2
1	16114132	252283830	Estimated carcass lean content QTL (5678)	1	109184403	109189089	MSTRG.1558.1
1	16114132	252283830	Estimated carcass lean content QTL (5678)	1	109185924	109189089	MSTRG.1558.2
1	16114132	252283830	Estimated carcass lean content QTL (5678)	1	115698959	115734281	MSTRG.1813.1
1	16114132	252283830	Estimated carcass lean content QTL (5678)	1	138258064	138262930	MSTRG.2297.1
1	16114132	252283830	Estimated carcass lean content QTL (5678)	1	179788962	179799724	MSTRG.2773.1
1	16114132	252283830	Estimated carcass lean content QTL (5678)	1	179796932	179799853	MSTRG.2773.2
1	16114132	252283830	Estimated carcass lean content QTL (5678)	1	213147552	213195062	MSTRG.3379.1
1	16114132	252283830	Estimated carcass lean content QTL (5678)	1	247060447	247069977	MSTRG.3931.1
1	16114132	252283830	Estimated carcass lean content QTL (5678)	1	247062253	247065719	MSTRG.3931.2
1	16114132	252283830	Estimated carcass lean content QTL (5678)	1	229871932	229955811	MSTRG.3631.1
1	16114132	252283830	Estimated carcass lean content QTL (5678)	1	106933151	106963961	MSTRG.1497.1
1	16114132	252283830	Fat to meat ratio QTL (5677)	1	16653403	16681491	MSTRG.319.1
1	16114132	252283830	Fat to meat ratio QTL (5677)	1	16659399	16681491	MSTRG.319.2
1	16114132	252283830	Fat to meat ratio QTL (5677)	1	30776372	30781149	MSTRG.572.1
1	16114132	252283830	Fat to meat ratio QTL (5677)	1	43980633	43981357	MSTRG.761.1
1	16114132	252283830	Fat to meat ratio QTL (5677)	1	51496270	51499483	MSTRG.834.1
1	16114132	252283830	Fat to meat ratio QTL (5677)	1	52447424	52460077	MSTRG.852.1
1	16114132	252283830	Fat to meat ratio QTL (5677)	1	107150104	107154187	MSTRG.1509.1
1	16114132	252283830	Fat to meat ratio QTL (5677)	1	107150105	107154546	MSTRG.1509.2
1	16114132	252283830	Fat to meat ratio QTL (5677)	1	109184403	109189089	MSTRG.1558.1
1	16114132	252283830	Fat to meat ratio QTL (5677)	1	109185924	109189089	MSTRG.1558.2
1	16114132	252283830	Fat to meat ratio QTL (5677)	1	115698959	115734281	MSTRG.1813.1
1	16114132	252283830	Fat to meat ratio QTL (5677)	1	138258064	138262930	MSTRG.2297.1
1	16114132	252283830	Fat to meat ratio QTL (5677)	1	179788962	179799724	MSTRG.2773.1
1	16114132	252283830	Fat to meat ratio QTL (5677)	1	179796932	179799853	MSTRG.2773.2
1	16114132	252283830	Fat to meat ratio QTL (5677)	1	213147552	213195062	MSTRG.3379.1
1	16114132	252283830	Fat to meat ratio QTL (5677)	1	247060447	247069977	MSTRG.3931.1
1	16114132	252283830	Fat to meat ratio QTL (5677)	1	247062253	247065719	MSTRG.3931.2
1	16114132	252283830	Fat to meat ratio QTL (5677)	1	229871932	229955811	MSTRG.3631.1
1	16114132	252283830	Fat to meat ratio QTL (5677)	1	106933151	106963961	MSTRG.1497.1
1	16114132	292187438	Shoulder subcutaneous fat thickness QTL (5217)	1	16653403	16681491	MSTRG.319.1
1	16114132	292187438	Shoulder subcutaneous fat thickness QTL (5217)	1	16659399	16681491	MSTRG.319.2
1	16114132	292187438	Shoulder subcutaneous fat thickness QTL (5217)	1	30776372	30781149	MSTRG.572.1
1	16114132	292187438	Shoulder subcutaneous fat thickness QTL (5217)	1	43980633	43981357	MSTRG.761.1
1	16114132	292187438	Shoulder subcutaneous fat thickness QTL (5217)	1	51496270	51499483	MSTRG.834.1
1	16114132	292187438	Shoulder subcutaneous fat thickness QTL (5217)	1	52447424	52460077	MSTRG.852.1
1	16114132	292187438	Shoulder subcutaneous fat thickness QTL (5217)	1	107150104	107154187	MSTRG.1509.1
1	16114132	292187438	Shoulder subcutaneous fat thickness QTL (5217)	1	107150105	107154546	MSTRG.1509.2
1	16114132	292187438	Shoulder subcutaneous fat thickness QTL (5217)	1	109184403	109189089	MSTRG.1558.1
1	16114132	292187438	Shoulder subcutaneous fat thickness QTL (5217)	1	109185924	109189089	MSTRG.1558.2
1	16114132	292187438	Shoulder subcutaneous fat thickness QTL (5217)	1	115698959	115734281	MSTRG.1813.1
1	16114132	292187438	Shoulder subcutaneous fat thickness QTL (5217)	1	138258064	138262930	MSTRG.2297.1
1	16114132	292187438	Shoulder subcutaneous fat thickness QTL (5217)	1	179788962	179799724	MSTRG.2773.1
1	16114132	292187438	Shoulder subcutaneous fat thickness QTL (5217)	1	179796932	179799853	MSTRG.2773.2
1	16114132	292187438	Shoulder subcutaneous fat thickness QTL (5217)	1	213147552	213195062	MSTRG.3379.1
1	16114132	292187438	Shoulder subcutaneous fat thickness QTL (5217)	1	247060447	247069977	MSTRG.3931.1
1	16114132	292187438	Shoulder subcutaneous fat thickness QTL (5217)	1	247062253	247065719	MSTRG.3931.2
1	16114132	292187438	Shoulder subcutaneous fat thickness QTL (5217)	1	264223330	264237373	MSTRG.4184.1
1	16114132	292187438	Shoulder subcutaneous fat thickness QTL (5217)	1	264223330	264237373	MSTRG.4184.2
1	16114132	292187438	Shoulder subcutaneous fat thickness QTL (5217)	1	267187495	267188526	MSTRG.4258.2
1	16114132	292187438	Shoulder subcutaneous fat thickness QTL (5217)	1	267187495	267206909	MSTRG.4258.1
1	16114132	292187438	Shoulder subcutaneous fat thickness QTL (5217)	1	229871932	229955811	MSTRG.3631.1
1	16114132	292187438	Shoulder subcutaneous fat thickness QTL (5217)	1	106933151	106963961	MSTRG.1497.1
1	16114132	292845492	backfat above muscle dorsi QTL (5237)	1	16653403	16681491	MSTRG.319.1
1	16114132	292845492	backfat above muscle dorsi QTL (5237)	1	16659399	16681491	MSTRG.319.2
1	16114132	292845492	backfat above muscle dorsi QTL (5237)	1	30776372	30781149	MSTRG.572.1
1	16114132	292845492	backfat above muscle dorsi QTL (5237)	1	43980633	43981357	MSTRG.761.1
1	16114132	292845492	backfat above muscle dorsi QTL (5237)	1	51496270	51499483	MSTRG.834.1
1	16114132	292845492	backfat above muscle dorsi QTL (5237)	1	52447424	52460077	MSTRG.852.1
1	16114132	292845492	backfat above muscle dorsi QTL (5237)	1	107150104	107154187	MSTRG.1509.1
1	16114132	292845492	backfat above muscle dorsi QTL (5237)	1	107150105	107154546	MSTRG.1509.2
1	16114132	292845492	backfat above muscle dorsi QTL (5237)	1	109184403	109189089	MSTRG.1558.1
1	16114132	292845492	backfat above muscle dorsi QTL (5237)	1	109185924	109189089	MSTRG.1558.2
1	16114132	292845492	backfat above muscle dorsi QTL (5237)	1	115698959	115734281	MSTRG.1813.1
1	16114132	292845492	backfat above muscle dorsi QTL (5237)	1	138258064	138262930	MSTRG.2297.1
1	16114132	292845492	backfat above muscle dorsi QTL (5237)	1	179788962	179799724	MSTRG.2773.1
1	16114132	292845492	backfat above muscle dorsi QTL (5237)	1	179796932	179799853	MSTRG.2773.2
1	16114132	292845492	backfat above muscle dorsi QTL (5237)	1	213147552	213195062	MSTRG.3379.1
1	16114132	292845492	backfat above muscle dorsi QTL (5237)	1	247060447	247069977	MSTRG.3931.1
1	16114132	292845492	backfat above muscle dorsi QTL (5237)	1	247062253	247065719	MSTRG.3931.2
1	16114132	292845492	backfat above muscle dorsi QTL (5237)	1	264223330	264237373	MSTRG.4184.1
1	16114132	292845492	backfat above muscle dorsi QTL (5237)	1	264223330	264237373	MSTRG.4184.2
1	16114132	292845492	backfat above muscle dorsi QTL (5237)	1	267187495	267188526	MSTRG.4258.2
1	16114132	292845492	backfat above muscle dorsi QTL (5237)	1	267187495	267206909	MSTRG.4258.1
1	16114132	292845492	backfat above muscle dorsi QTL (5237)	1	229871932	229955811	MSTRG.3631.1
1	16114132	292845492	backfat above muscle dorsi QTL (5237)	1	106933151	106963961	MSTRG.1497.1
1	16576943	16717321	Drip loss QTL (8183)	1	16653403	16681491	MSTRG.319.1
1	16576943	16717321	Drip loss QTL (8183)	1	16659399	16681491	MSTRG.319.2
1	16576943	16717321	Drip loss QTL (8303)	1	16653403	16681491	MSTRG.319.1
1	16576943	16717321	Drip loss QTL (8303)	1	16659399	16681491	MSTRG.319.2
1	16576943	16717321	Drip loss QTL (8511)	1	16653403	16681491	MSTRG.319.1
1	16576943	16717321	Drip loss QTL (8511)	1	16659399	16681491	MSTRG.319.2
1	16597513	16870187	mummified pigs QTL (18238)	1	16653403	16681491	MSTRG.319.1
1	16597513	16870187	mummified pigs QTL (18238)	1	16659399	16681491	MSTRG.319.2
1	18004420	242497921	Melanoma susceptibility QTL (7592)	1	30776372	30781149	MSTRG.572.1
1	18004420	242497921	Melanoma susceptibility QTL (7592)	1	43980633	43981357	MSTRG.761.1
1	18004420	242497921	Melanoma susceptibility QTL (7592)	1	51496270	51499483	MSTRG.834.1
1	18004420	242497921	Melanoma susceptibility QTL (7592)	1	52447424	52460077	MSTRG.852.1
1	18004420	242497921	Melanoma susceptibility QTL (7592)	1	107150104	107154187	MSTRG.1509.1
1	18004420	242497921	Melanoma susceptibility QTL (7592)	1	107150105	107154546	MSTRG.1509.2
1	18004420	242497921	Melanoma susceptibility QTL (7592)	1	109184403	109189089	MSTRG.1558.1
1	18004420	242497921	Melanoma susceptibility QTL (7592)	1	109185924	109189089	MSTRG.1558.2
1	18004420	242497921	Melanoma susceptibility QTL (7592)	1	115698959	115734281	MSTRG.1813.1
1	18004420	242497921	Melanoma susceptibility QTL (7592)	1	138258064	138262930	MSTRG.2297.1
1	18004420	242497921	Melanoma susceptibility QTL (7592)	1	179788962	179799724	MSTRG.2773.1
1	18004420	242497921	Melanoma susceptibility QTL (7592)	1	179796932	179799853	MSTRG.2773.2
1	18004420	242497921	Melanoma susceptibility QTL (7592)	1	213147552	213195062	MSTRG.3379.1
1	18004420	242497921	Melanoma susceptibility QTL (7592)	1	229871932	229955811	MSTRG.3631.1
1	18004420	242497921	Melanoma susceptibility QTL (7592)	1	106933151	106963961	MSTRG.1497.1
1	20064508	52874641	Meat color a* QTL (3980)	1	30776372	30781149	MSTRG.572.1
1	20064508	52874641	Meat color a* QTL (3980)	1	43980633	43981357	MSTRG.761.1
1	20064508	52874641	Meat color a* QTL (3980)	1	51496270	51499483	MSTRG.834.1
1	20064508	52874641	Meat color a* QTL (3980)	1	52447424	52460077	MSTRG.852.1
1	20064508	36144885	Average daily gain QTL (338)	1	30776372	30781149	MSTRG.572.1
1	20064508	274130998	White blood cell counts QTL (15047)	1	30776372	30781149	MSTRG.572.1
1	20064508	274130998	White blood cell counts QTL (15047)	1	43980633	43981357	MSTRG.761.1
1	20064508	274130998	White blood cell counts QTL (15047)	1	51496270	51499483	MSTRG.834.1
1	20064508	274130998	White blood cell counts QTL (15047)	1	52447424	52460077	MSTRG.852.1
1	20064508	274130998	White blood cell counts QTL (15047)	1	107150104	107154187	MSTRG.1509.1
1	20064508	274130998	White blood cell counts QTL (15047)	1	107150105	107154546	MSTRG.1509.2
1	20064508	274130998	White blood cell counts QTL (15047)	1	109184403	109189089	MSTRG.1558.1
1	20064508	274130998	White blood cell counts QTL (15047)	1	109185924	109189089	MSTRG.1558.2
1	20064508	274130998	White blood cell counts QTL (15047)	1	115698959	115734281	MSTRG.1813.1
1	20064508	274130998	White blood cell counts QTL (15047)	1	138258064	138262930	MSTRG.2297.1
1	20064508	274130998	White blood cell counts QTL (15047)	1	179788962	179799724	MSTRG.2773.1
1	20064508	274130998	White blood cell counts QTL (15047)	1	179796932	179799853	MSTRG.2773.2
1	20064508	274130998	White blood cell counts QTL (15047)	1	213147552	213195062	MSTRG.3379.1
1	20064508	274130998	White blood cell counts QTL (15047)	1	247060447	247069977	MSTRG.3931.1
1	20064508	274130998	White blood cell counts QTL (15047)	1	247062253	247065719	MSTRG.3931.2
1	20064508	274130998	White blood cell counts QTL (15047)	1	264223330	264237373	MSTRG.4184.1
1	20064508	274130998	White blood cell counts QTL (15047)	1	264223330	264237373	MSTRG.4184.2
1	20064508	274130998	White blood cell counts QTL (15047)	1	267187495	267188526	MSTRG.4258.2
1	20064508	274130998	White blood cell counts QTL (15047)	1	267187495	267206909	MSTRG.4258.1
1	20064508	274130998	White blood cell counts QTL (15047)	1	229871932	229955811	MSTRG.3631.1
1	20064508	274130998	White blood cell counts QTL (15047)	1	106933151	106963961	MSTRG.1497.1
1	20064508	210644363	Body weight (20 weeks) QTL (29689)	1	30776372	30781149	MSTRG.572.1
1	20064508	210644363	Body weight (20 weeks) QTL (29689)	1	43980633	43981357	MSTRG.761.1
1	20064508	210644363	Body weight (20 weeks) QTL (29689)	1	51496270	51499483	MSTRG.834.1
1	20064508	210644363	Body weight (20 weeks) QTL (29689)	1	52447424	52460077	MSTRG.852.1
1	20064508	210644363	Body weight (20 weeks) QTL (29689)	1	107150104	107154187	MSTRG.1509.1
1	20064508	210644363	Body weight (20 weeks) QTL (29689)	1	107150105	107154546	MSTRG.1509.2
1	20064508	210644363	Body weight (20 weeks) QTL (29689)	1	109184403	109189089	MSTRG.1558.1
1	20064508	210644363	Body weight (20 weeks) QTL (29689)	1	109185924	109189089	MSTRG.1558.2
1	20064508	210644363	Body weight (20 weeks) QTL (29689)	1	115698959	115734281	MSTRG.1813.1
1	20064508	210644363	Body weight (20 weeks) QTL (29689)	1	138258064	138262930	MSTRG.2297.1
1	20064508	210644363	Body weight (20 weeks) QTL (29689)	1	179788962	179799724	MSTRG.2773.1
1	20064508	210644363	Body weight (20 weeks) QTL (29689)	1	179796932	179799853	MSTRG.2773.2
1	20064508	210644363	Body weight (20 weeks) QTL (29689)	1	106933151	106963961	MSTRG.1497.1
1	22514169	52874641	Backfat at tenth rib QTL (43)	1	30776372	30781149	MSTRG.572.1
1	22514169	52874641	Backfat at tenth rib QTL (43)	1	43980633	43981357	MSTRG.761.1
1	22514169	52874641	Backfat at tenth rib QTL (43)	1	51496270	51499483	MSTRG.834.1
1	22514169	52874641	Backfat at tenth rib QTL (43)	1	52447424	52460077	MSTRG.852.1
1	22514169	52874641	muscle protein percentage QTL (3838)	1	30776372	30781149	MSTRG.572.1
1	22514169	52874641	muscle protein percentage QTL (3838)	1	43980633	43981357	MSTRG.761.1
1	22514169	52874641	muscle protein percentage QTL (3838)	1	51496270	51499483	MSTRG.834.1
1	22514169	52874641	muscle protein percentage QTL (3838)	1	52447424	52460077	MSTRG.852.1
1	24647055	52874641	Average daily gain QTL (16885)	1	30776372	30781149	MSTRG.572.1
1	24647055	52874641	Average daily gain QTL (16885)	1	43980633	43981357	MSTRG.761.1
1	24647055	52874641	Average daily gain QTL (16885)	1	51496270	51499483	MSTRG.834.1
1	24647055	52874641	Average daily gain QTL (16885)	1	52447424	52460077	MSTRG.852.1
1	24647055	52874641	Carcass weight (hot) QTL (16896)	1	30776372	30781149	MSTRG.572.1
1	24647055	52874641	Carcass weight (hot) QTL (16896)	1	43980633	43981357	MSTRG.761.1
1	24647055	52874641	Carcass weight (hot) QTL (16896)	1	51496270	51499483	MSTRG.834.1
1	24647055	52874641	Carcass weight (hot) QTL (16896)	1	52447424	52460077	MSTRG.852.1
1	24647055	52874641	Average backfat thickness QTL (42)	1	30776372	30781149	MSTRG.572.1
1	24647055	52874641	Average backfat thickness QTL (42)	1	43980633	43981357	MSTRG.761.1
1	24647055	52874641	Average backfat thickness QTL (42)	1	51496270	51499483	MSTRG.834.1
1	24647055	52874641	Average backfat thickness QTL (42)	1	52447424	52460077	MSTRG.852.1
1	24647055	52874641	Loin muscle area QTL (46)	1	30776372	30781149	MSTRG.572.1
1	24647055	52874641	Loin muscle area QTL (46)	1	43980633	43981357	MSTRG.761.1
1	24647055	52874641	Loin muscle area QTL (46)	1	51496270	51499483	MSTRG.834.1
1	24647055	52874641	Loin muscle area QTL (46)	1	52447424	52460077	MSTRG.852.1
1	24647055	257944209	Subcutanous fat area QTL (5676)	1	30776372	30781149	MSTRG.572.1
1	24647055	257944209	Subcutanous fat area QTL (5676)	1	43980633	43981357	MSTRG.761.1
1	24647055	257944209	Subcutanous fat area QTL (5676)	1	51496270	51499483	MSTRG.834.1
1	24647055	257944209	Subcutanous fat area QTL (5676)	1	52447424	52460077	MSTRG.852.1
1	24647055	257944209	Subcutanous fat area QTL (5676)	1	107150104	107154187	MSTRG.1509.1
1	24647055	257944209	Subcutanous fat area QTL (5676)	1	107150105	107154546	MSTRG.1509.2
1	24647055	257944209	Subcutanous fat area QTL (5676)	1	109184403	109189089	MSTRG.1558.1
1	24647055	257944209	Subcutanous fat area QTL (5676)	1	109185924	109189089	MSTRG.1558.2
1	24647055	257944209	Subcutanous fat area QTL (5676)	1	115698959	115734281	MSTRG.1813.1
1	24647055	257944209	Subcutanous fat area QTL (5676)	1	138258064	138262930	MSTRG.2297.1
1	24647055	257944209	Subcutanous fat area QTL (5676)	1	179788962	179799724	MSTRG.2773.1
1	24647055	257944209	Subcutanous fat area QTL (5676)	1	179796932	179799853	MSTRG.2773.2
1	24647055	257944209	Subcutanous fat area QTL (5676)	1	213147552	213195062	MSTRG.3379.1
1	24647055	257944209	Subcutanous fat area QTL (5676)	1	247060447	247069977	MSTRG.3931.1
1	24647055	257944209	Subcutanous fat area QTL (5676)	1	247062253	247065719	MSTRG.3931.2
1	24647055	257944209	Subcutanous fat area QTL (5676)	1	229871932	229955811	MSTRG.3631.1
1	24647055	257944209	Subcutanous fat area QTL (5676)	1	106933151	106963961	MSTRG.1497.1
1	24647055	119841750	Carcass weight (hot) QTL (16901)	1	30776372	30781149	MSTRG.572.1
1	24647055	119841750	Carcass weight (hot) QTL (16901)	1	43980633	43981357	MSTRG.761.1
1	24647055	119841750	Carcass weight (hot) QTL (16901)	1	51496270	51499483	MSTRG.834.1
1	24647055	119841750	Carcass weight (hot) QTL (16901)	1	52447424	52460077	MSTRG.852.1
1	24647055	119841750	Carcass weight (hot) QTL (16901)	1	107150104	107154187	MSTRG.1509.1
1	24647055	119841750	Carcass weight (hot) QTL (16901)	1	107150105	107154546	MSTRG.1509.2
1	24647055	119841750	Carcass weight (hot) QTL (16901)	1	109184403	109189089	MSTRG.1558.1
1	24647055	119841750	Carcass weight (hot) QTL (16901)	1	109185924	109189089	MSTRG.1558.2
1	24647055	119841750	Carcass weight (hot) QTL (16901)	1	115698959	115734281	MSTRG.1813.1
1	24647055	119841750	Carcass weight (hot) QTL (16901)	1	106933151	106963961	MSTRG.1497.1
1	24673417	292845492	Body weight (weaning) QTL (5262)	1	30776372	30781149	MSTRG.572.1
1	24673417	292845492	Body weight (weaning) QTL (5262)	1	43980633	43981357	MSTRG.761.1
1	24673417	292845492	Body weight (weaning) QTL (5262)	1	51496270	51499483	MSTRG.834.1
1	24673417	292845492	Body weight (weaning) QTL (5262)	1	52447424	52460077	MSTRG.852.1
1	24673417	292845492	Body weight (weaning) QTL (5262)	1	107150104	107154187	MSTRG.1509.1
1	24673417	292845492	Body weight (weaning) QTL (5262)	1	107150105	107154546	MSTRG.1509.2
1	24673417	292845492	Body weight (weaning) QTL (5262)	1	109184403	109189089	MSTRG.1558.1
1	24673417	292845492	Body weight (weaning) QTL (5262)	1	109185924	109189089	MSTRG.1558.2
1	24673417	292845492	Body weight (weaning) QTL (5262)	1	115698959	115734281	MSTRG.1813.1
1	24673417	292845492	Body weight (weaning) QTL (5262)	1	138258064	138262930	MSTRG.2297.1
1	24673417	292845492	Body weight (weaning) QTL (5262)	1	179788962	179799724	MSTRG.2773.1
1	24673417	292845492	Body weight (weaning) QTL (5262)	1	179796932	179799853	MSTRG.2773.2
1	24673417	292845492	Body weight (weaning) QTL (5262)	1	213147552	213195062	MSTRG.3379.1
1	24673417	292845492	Body weight (weaning) QTL (5262)	1	247060447	247069977	MSTRG.3931.1
1	24673417	292845492	Body weight (weaning) QTL (5262)	1	247062253	247065719	MSTRG.3931.2
1	24673417	292845492	Body weight (weaning) QTL (5262)	1	264223330	264237373	MSTRG.4184.1
1	24673417	292845492	Body weight (weaning) QTL (5262)	1	264223330	264237373	MSTRG.4184.2
1	24673417	292845492	Body weight (weaning) QTL (5262)	1	267187495	267188526	MSTRG.4258.2
1	24673417	292845492	Body weight (weaning) QTL (5262)	1	267187495	267206909	MSTRG.4258.1
1	24673417	292845492	Body weight (weaning) QTL (5262)	1	229871932	229955811	MSTRG.3631.1
1	24673417	292845492	Body weight (weaning) QTL (5262)	1	106933151	106963961	MSTRG.1497.1
1	26587370	50856261	Loin muscle area QTL (3866)	1	30776372	30781149	MSTRG.572.1
1	26587370	50856261	Loin muscle area QTL (3866)	1	43980633	43981357	MSTRG.761.1
1	30337524	32683141	pH 24 hr post mortem (ham) QTL (28046)	1	30776372	30781149	MSTRG.572.1
1	30337524	32683141	Meat color b* QTL (28047)	1	30776372	30781149	MSTRG.572.1
1	32319237	48054350	Marbling QTL (4018)	1	43980633	43981357	MSTRG.761.1
1	32319237	289379107	Front feet conformation QTL (17635)	1	43980633	43981357	MSTRG.761.1
1	32319237	289379107	Front feet conformation QTL (17635)	1	51496270	51499483	MSTRG.834.1
1	32319237	289379107	Front feet conformation QTL (17635)	1	52447424	52460077	MSTRG.852.1
1	32319237	289379107	Front feet conformation QTL (17635)	1	107150104	107154187	MSTRG.1509.1
1	32319237	289379107	Front feet conformation QTL (17635)	1	107150105	107154546	MSTRG.1509.2
1	32319237	289379107	Front feet conformation QTL (17635)	1	109184403	109189089	MSTRG.1558.1
1	32319237	289379107	Front feet conformation QTL (17635)	1	109185924	109189089	MSTRG.1558.2
1	32319237	289379107	Front feet conformation QTL (17635)	1	115698959	115734281	MSTRG.1813.1
1	32319237	289379107	Front feet conformation QTL (17635)	1	138258064	138262930	MSTRG.2297.1
1	32319237	289379107	Front feet conformation QTL (17635)	1	179788962	179799724	MSTRG.2773.1
1	32319237	289379107	Front feet conformation QTL (17635)	1	179796932	179799853	MSTRG.2773.2
1	32319237	289379107	Front feet conformation QTL (17635)	1	213147552	213195062	MSTRG.3379.1
1	32319237	289379107	Front feet conformation QTL (17635)	1	247060447	247069977	MSTRG.3931.1
1	32319237	289379107	Front feet conformation QTL (17635)	1	247062253	247065719	MSTRG.3931.2
1	32319237	289379107	Front feet conformation QTL (17635)	1	264223330	264237373	MSTRG.4184.1
1	32319237	289379107	Front feet conformation QTL (17635)	1	264223330	264237373	MSTRG.4184.2
1	32319237	289379107	Front feet conformation QTL (17635)	1	267187495	267188526	MSTRG.4258.2
1	32319237	289379107	Front feet conformation QTL (17635)	1	267187495	267206909	MSTRG.4258.1
1	32319237	289379107	Front feet conformation QTL (17635)	1	229871932	229955811	MSTRG.3631.1
1	32319237	289379107	Front feet conformation QTL (17635)	1	106933151	106963961	MSTRG.1497.1
1	35389848	52874641	Average daily gain QTL (841)	1	43980633	43981357	MSTRG.761.1
1	35389848	52874641	Average daily gain QTL (841)	1	51496270	51499483	MSTRG.834.1
1	35389848	52874641	Average daily gain QTL (841)	1	52447424	52460077	MSTRG.852.1
1	35389848	52874641	Carcass weight (cold) QTL (836)	1	43980633	43981357	MSTRG.761.1
1	35389848	52874641	Carcass weight (cold) QTL (836)	1	51496270	51499483	MSTRG.834.1
1	35389848	52874641	Carcass weight (cold) QTL (836)	1	52447424	52460077	MSTRG.852.1
1	35389848	52874641	Ham weight QTL (837)	1	43980633	43981357	MSTRG.761.1
1	35389848	52874641	Ham weight QTL (837)	1	51496270	51499483	MSTRG.834.1
1	35389848	52874641	Ham weight QTL (837)	1	52447424	52460077	MSTRG.852.1
1	35389848	52874641	Body weight (slaughter) QTL (843)	1	43980633	43981357	MSTRG.761.1
1	35389848	52874641	Body weight (slaughter) QTL (843)	1	51496270	51499483	MSTRG.834.1
1	35389848	52874641	Body weight (slaughter) QTL (843)	1	52447424	52460077	MSTRG.852.1
1	35389848	52874641	Head weight QTL (831)	1	43980633	43981357	MSTRG.761.1
1	35389848	52874641	Head weight QTL (831)	1	51496270	51499483	MSTRG.834.1
1	35389848	52874641	Head weight QTL (831)	1	52447424	52460077	MSTRG.852.1
1	35389848	52874641	Carcass weight (cold) QTL (12710)	1	43980633	43981357	MSTRG.761.1
1	35389848	52874641	Carcass weight (cold) QTL (12710)	1	51496270	51499483	MSTRG.834.1
1	35389848	52874641	Carcass weight (cold) QTL (12710)	1	52447424	52460077	MSTRG.852.1
1	35389848	52874641	Shoulder meat weight QTL (846)	1	43980633	43981357	MSTRG.761.1
1	35389848	52874641	Shoulder meat weight QTL (846)	1	51496270	51499483	MSTRG.834.1
1	35389848	52874641	Shoulder meat weight QTL (846)	1	52447424	52460077	MSTRG.852.1
1	35389848	52874641	Loin and neck meat weight QTL (807)	1	43980633	43981357	MSTRG.761.1
1	35389848	52874641	Loin and neck meat weight QTL (807)	1	51496270	51499483	MSTRG.834.1
1	35389848	52874641	Loin and neck meat weight QTL (807)	1	52447424	52460077	MSTRG.852.1
1	35389848	52874641	External fat on ham QTL (12718)	1	43980633	43981357	MSTRG.761.1
1	35389848	52874641	External fat on ham QTL (12718)	1	51496270	51499483	MSTRG.834.1
1	35389848	52874641	External fat on ham QTL (12718)	1	52447424	52460077	MSTRG.852.1
1	35389848	52874641	Shoulder external fat weight QTL (825)	1	43980633	43981357	MSTRG.761.1
1	35389848	52874641	Shoulder external fat weight QTL (825)	1	51496270	51499483	MSTRG.834.1
1	35389848	52874641	Shoulder external fat weight QTL (825)	1	52447424	52460077	MSTRG.852.1
1	35389848	52874641	Carcass weight (cold) QTL (792)	1	43980633	43981357	MSTRG.761.1
1	35389848	52874641	Carcass weight (cold) QTL (792)	1	51496270	51499483	MSTRG.834.1
1	35389848	52874641	Carcass weight (cold) QTL (792)	1	52447424	52460077	MSTRG.852.1
1	35389848	52874641	Loin weight QTL (833)	1	43980633	43981357	MSTRG.761.1
1	35389848	52874641	Loin weight QTL (833)	1	51496270	51499483	MSTRG.834.1
1	35389848	52874641	Loin weight QTL (833)	1	52447424	52460077	MSTRG.852.1
1	35389848	120316411	Backfat at last rib QTL (16831)	1	43980633	43981357	MSTRG.761.1
1	35389848	120316411	Backfat at last rib QTL (16831)	1	51496270	51499483	MSTRG.834.1
1	35389848	120316411	Backfat at last rib QTL (16831)	1	52447424	52460077	MSTRG.852.1
1	35389848	120316411	Backfat at last rib QTL (16831)	1	107150104	107154187	MSTRG.1509.1
1	35389848	120316411	Backfat at last rib QTL (16831)	1	107150105	107154546	MSTRG.1509.2
1	35389848	120316411	Backfat at last rib QTL (16831)	1	109184403	109189089	MSTRG.1558.1
1	35389848	120316411	Backfat at last rib QTL (16831)	1	109185924	109189089	MSTRG.1558.2
1	35389848	120316411	Backfat at last rib QTL (16831)	1	115698959	115734281	MSTRG.1813.1
1	35389848	120316411	Backfat at last rib QTL (16831)	1	106933151	106963961	MSTRG.1497.1
1	35389848	228164160	CD2-positive leukocyte number QTL (4260)	1	43980633	43981357	MSTRG.761.1
1	35389848	228164160	CD2-positive leukocyte number QTL (4260)	1	51496270	51499483	MSTRG.834.1
1	35389848	228164160	CD2-positive leukocyte number QTL (4260)	1	52447424	52460077	MSTRG.852.1
1	35389848	228164160	CD2-positive leukocyte number QTL (4260)	1	107150104	107154187	MSTRG.1509.1
1	35389848	228164160	CD2-positive leukocyte number QTL (4260)	1	107150105	107154546	MSTRG.1509.2
1	35389848	228164160	CD2-positive leukocyte number QTL (4260)	1	109184403	109189089	MSTRG.1558.1
1	35389848	228164160	CD2-positive leukocyte number QTL (4260)	1	109185924	109189089	MSTRG.1558.2
1	35389848	228164160	CD2-positive leukocyte number QTL (4260)	1	115698959	115734281	MSTRG.1813.1
1	35389848	228164160	CD2-positive leukocyte number QTL (4260)	1	138258064	138262930	MSTRG.2297.1
1	35389848	228164160	CD2-positive leukocyte number QTL (4260)	1	179788962	179799724	MSTRG.2773.1
1	35389848	228164160	CD2-positive leukocyte number QTL (4260)	1	179796932	179799853	MSTRG.2773.2
1	35389848	228164160	CD2-positive leukocyte number QTL (4260)	1	213147552	213195062	MSTRG.3379.1
1	35389848	228164160	CD2-positive leukocyte number QTL (4260)	1	106933151	106963961	MSTRG.1497.1
1	35389848	228164160	CD4-positive leukocyte number QTL (4261)	1	43980633	43981357	MSTRG.761.1
1	35389848	228164160	CD4-positive leukocyte number QTL (4261)	1	51496270	51499483	MSTRG.834.1
1	35389848	228164160	CD4-positive leukocyte number QTL (4261)	1	52447424	52460077	MSTRG.852.1
1	35389848	228164160	CD4-positive leukocyte number QTL (4261)	1	107150104	107154187	MSTRG.1509.1
1	35389848	228164160	CD4-positive leukocyte number QTL (4261)	1	107150105	107154546	MSTRG.1509.2
1	35389848	228164160	CD4-positive leukocyte number QTL (4261)	1	109184403	109189089	MSTRG.1558.1
1	35389848	228164160	CD4-positive leukocyte number QTL (4261)	1	109185924	109189089	MSTRG.1558.2
1	35389848	228164160	CD4-positive leukocyte number QTL (4261)	1	115698959	115734281	MSTRG.1813.1
1	35389848	228164160	CD4-positive leukocyte number QTL (4261)	1	138258064	138262930	MSTRG.2297.1
1	35389848	228164160	CD4-positive leukocyte number QTL (4261)	1	179788962	179799724	MSTRG.2773.1
1	35389848	228164160	CD4-positive leukocyte number QTL (4261)	1	179796932	179799853	MSTRG.2773.2
1	35389848	228164160	CD4-positive leukocyte number QTL (4261)	1	213147552	213195062	MSTRG.3379.1
1	35389848	228164160	CD4-positive leukocyte number QTL (4261)	1	106933151	106963961	MSTRG.1497.1
1	35389848	169149638	Dressing percentage QTL (3222)	1	43980633	43981357	MSTRG.761.1
1	35389848	169149638	Dressing percentage QTL (3222)	1	51496270	51499483	MSTRG.834.1
1	35389848	169149638	Dressing percentage QTL (3222)	1	52447424	52460077	MSTRG.852.1
1	35389848	169149638	Dressing percentage QTL (3222)	1	107150104	107154187	MSTRG.1509.1
1	35389848	169149638	Dressing percentage QTL (3222)	1	107150105	107154546	MSTRG.1509.2
1	35389848	169149638	Dressing percentage QTL (3222)	1	109184403	109189089	MSTRG.1558.1
1	35389848	169149638	Dressing percentage QTL (3222)	1	109185924	109189089	MSTRG.1558.2
1	35389848	169149638	Dressing percentage QTL (3222)	1	115698959	115734281	MSTRG.1813.1
1	35389848	169149638	Dressing percentage QTL (3222)	1	138258064	138262930	MSTRG.2297.1
1	35389848	169149638	Dressing percentage QTL (3222)	1	106933151	106963961	MSTRG.1497.1
1	35389848	230570794	Muscle fat content QTL (79)	1	43980633	43981357	MSTRG.761.1
1	35389848	230570794	Muscle fat content QTL (79)	1	51496270	51499483	MSTRG.834.1
1	35389848	230570794	Muscle fat content QTL (79)	1	52447424	52460077	MSTRG.852.1
1	35389848	230570794	Muscle fat content QTL (79)	1	107150104	107154187	MSTRG.1509.1
1	35389848	230570794	Muscle fat content QTL (79)	1	107150105	107154546	MSTRG.1509.2
1	35389848	230570794	Muscle fat content QTL (79)	1	109184403	109189089	MSTRG.1558.1
1	35389848	230570794	Muscle fat content QTL (79)	1	109185924	109189089	MSTRG.1558.2
1	35389848	230570794	Muscle fat content QTL (79)	1	115698959	115734281	MSTRG.1813.1
1	35389848	230570794	Muscle fat content QTL (79)	1	138258064	138262930	MSTRG.2297.1
1	35389848	230570794	Muscle fat content QTL (79)	1	179788962	179799724	MSTRG.2773.1
1	35389848	230570794	Muscle fat content QTL (79)	1	179796932	179799853	MSTRG.2773.2
1	35389848	230570794	Muscle fat content QTL (79)	1	213147552	213195062	MSTRG.3379.1
1	35389848	230570794	Muscle fat content QTL (79)	1	229871932	229955811	MSTRG.3631.1
1	35389848	230570794	Muscle fat content QTL (79)	1	106933151	106963961	MSTRG.1497.1
1	36144885	46089931	Drip loss QTL (7963)	1	43980633	43981357	MSTRG.761.1
1	36144885	46089931	Drip loss QTL (8052)	1	43980633	43981357	MSTRG.761.1
1	36144885	46089931	Drip loss QTL (8324)	1	43980633	43981357	MSTRG.761.1
1	36144885	46089931	Drip loss QTL (7791)	1	43980633	43981357	MSTRG.761.1
1	36144885	46089931	Drip loss QTL (7793)	1	43980633	43981357	MSTRG.761.1
1	36144885	46089931	Drip loss QTL (7821)	1	43980633	43981357	MSTRG.761.1
1	36144885	46089931	Drip loss QTL (7828)	1	43980633	43981357	MSTRG.761.1
1	36144885	46089931	Drip loss QTL (8597)	1	43980633	43981357	MSTRG.761.1
1	36144885	154329026	Backfat at tenth rib QTL (5672)	1	43980633	43981357	MSTRG.761.1
1	36144885	154329026	Backfat at tenth rib QTL (5672)	1	51496270	51499483	MSTRG.834.1
1	36144885	154329026	Backfat at tenth rib QTL (5672)	1	52447424	52460077	MSTRG.852.1
1	36144885	154329026	Backfat at tenth rib QTL (5672)	1	107150104	107154187	MSTRG.1509.1
1	36144885	154329026	Backfat at tenth rib QTL (5672)	1	107150105	107154546	MSTRG.1509.2
1	36144885	154329026	Backfat at tenth rib QTL (5672)	1	109184403	109189089	MSTRG.1558.1
1	36144885	154329026	Backfat at tenth rib QTL (5672)	1	109185924	109189089	MSTRG.1558.2
1	36144885	154329026	Backfat at tenth rib QTL (5672)	1	115698959	115734281	MSTRG.1813.1
1	36144885	154329026	Backfat at tenth rib QTL (5672)	1	138258064	138262930	MSTRG.2297.1
1	36144885	154329026	Backfat at tenth rib QTL (5672)	1	106933151	106963961	MSTRG.1497.1
1	36144885	154329026	Side fat thickness QTL (5675)	1	43980633	43981357	MSTRG.761.1
1	36144885	154329026	Side fat thickness QTL (5675)	1	51496270	51499483	MSTRG.834.1
1	36144885	154329026	Side fat thickness QTL (5675)	1	52447424	52460077	MSTRG.852.1
1	36144885	154329026	Side fat thickness QTL (5675)	1	107150104	107154187	MSTRG.1509.1
1	36144885	154329026	Side fat thickness QTL (5675)	1	107150105	107154546	MSTRG.1509.2
1	36144885	154329026	Side fat thickness QTL (5675)	1	109184403	109189089	MSTRG.1558.1
1	36144885	154329026	Side fat thickness QTL (5675)	1	109185924	109189089	MSTRG.1558.2
1	36144885	154329026	Side fat thickness QTL (5675)	1	115698959	115734281	MSTRG.1813.1
1	36144885	154329026	Side fat thickness QTL (5675)	1	138258064	138262930	MSTRG.2297.1
1	36144885	154329026	Side fat thickness QTL (5675)	1	106933151	106963961	MSTRG.1497.1
1	36144885	105086765	Estimated carcass lean content QTL (5960)	1	43980633	43981357	MSTRG.761.1
1	36144885	105086765	Estimated carcass lean content QTL (5960)	1	51496270	51499483	MSTRG.834.1
1	36144885	105086765	Estimated carcass lean content QTL (5960)	1	52447424	52460077	MSTRG.852.1
1	36144885	204653903	PRRSV antibody titer QTL (9658)	1	43980633	43981357	MSTRG.761.1
1	36144885	204653903	PRRSV antibody titer QTL (9658)	1	51496270	51499483	MSTRG.834.1
1	36144885	204653903	PRRSV antibody titer QTL (9658)	1	52447424	52460077	MSTRG.852.1
1	36144885	204653903	PRRSV antibody titer QTL (9658)	1	107150104	107154187	MSTRG.1509.1
1	36144885	204653903	PRRSV antibody titer QTL (9658)	1	107150105	107154546	MSTRG.1509.2
1	36144885	204653903	PRRSV antibody titer QTL (9658)	1	109184403	109189089	MSTRG.1558.1
1	36144885	204653903	PRRSV antibody titer QTL (9658)	1	109185924	109189089	MSTRG.1558.2
1	36144885	204653903	PRRSV antibody titer QTL (9658)	1	115698959	115734281	MSTRG.1813.1
1	36144885	204653903	PRRSV antibody titer QTL (9658)	1	138258064	138262930	MSTRG.2297.1
1	36144885	204653903	PRRSV antibody titer QTL (9658)	1	179788962	179799724	MSTRG.2773.1
1	36144885	204653903	PRRSV antibody titer QTL (9658)	1	179796932	179799853	MSTRG.2773.2
1	36144885	204653903	PRRSV antibody titer QTL (9658)	1	106933151	106963961	MSTRG.1497.1
1	42824511	293329173	Skin thickness QTL (31809)	1	43980633	43981357	MSTRG.761.1
1	42824511	293329173	Skin thickness QTL (31809)	1	51496270	51499483	MSTRG.834.1
1	42824511	293329173	Skin thickness QTL (31809)	1	52447424	52460077	MSTRG.852.1
1	42824511	293329173	Skin thickness QTL (31809)	1	107150104	107154187	MSTRG.1509.1
1	42824511	293329173	Skin thickness QTL (31809)	1	107150105	107154546	MSTRG.1509.2
1	42824511	293329173	Skin thickness QTL (31809)	1	109184403	109189089	MSTRG.1558.1
1	42824511	293329173	Skin thickness QTL (31809)	1	109185924	109189089	MSTRG.1558.2
1	42824511	293329173	Skin thickness QTL (31809)	1	115698959	115734281	MSTRG.1813.1
1	42824511	293329173	Skin thickness QTL (31809)	1	138258064	138262930	MSTRG.2297.1
1	42824511	293329173	Skin thickness QTL (31809)	1	179788962	179799724	MSTRG.2773.1
1	42824511	293329173	Skin thickness QTL (31809)	1	179796932	179799853	MSTRG.2773.2
1	42824511	293329173	Skin thickness QTL (31809)	1	213147552	213195062	MSTRG.3379.1
1	42824511	293329173	Skin thickness QTL (31809)	1	247060447	247069977	MSTRG.3931.1
1	42824511	293329173	Skin thickness QTL (31809)	1	247062253	247065719	MSTRG.3931.2
1	42824511	293329173	Skin thickness QTL (31809)	1	264223330	264237373	MSTRG.4184.1
1	42824511	293329173	Skin thickness QTL (31809)	1	264223330	264237373	MSTRG.4184.2
1	42824511	293329173	Skin thickness QTL (31809)	1	267187495	267188526	MSTRG.4258.2
1	42824511	293329173	Skin thickness QTL (31809)	1	267187495	267206909	MSTRG.4258.1
1	42824511	293329173	Skin thickness QTL (31809)	1	229871932	229955811	MSTRG.3631.1
1	42824511	293329173	Skin thickness QTL (31809)	1	106933151	106963961	MSTRG.1497.1
1	43375367	65079451	Loin muscle area QTL (4013)	1	43980633	43981357	MSTRG.761.1
1	43375367	65079451	Loin muscle area QTL (4013)	1	51496270	51499483	MSTRG.834.1
1	43375367	65079451	Loin muscle area QTL (4013)	1	52447424	52460077	MSTRG.852.1
1	43375367	60090096	Backfat at tenth rib QTL (4014)	1	43980633	43981357	MSTRG.761.1
1	43375367	60090096	Backfat at tenth rib QTL (4014)	1	51496270	51499483	MSTRG.834.1
1	43375367	60090096	Backfat at tenth rib QTL (4014)	1	52447424	52460077	MSTRG.852.1
1	44131186	289788010	Backfat at rump QTL (21206)	1	51496270	51499483	MSTRG.834.1
1	44131186	289788010	Backfat at rump QTL (21206)	1	52447424	52460077	MSTRG.852.1
1	44131186	289788010	Backfat at rump QTL (21206)	1	107150104	107154187	MSTRG.1509.1
1	44131186	289788010	Backfat at rump QTL (21206)	1	107150105	107154546	MSTRG.1509.2
1	44131186	289788010	Backfat at rump QTL (21206)	1	109184403	109189089	MSTRG.1558.1
1	44131186	289788010	Backfat at rump QTL (21206)	1	109185924	109189089	MSTRG.1558.2
1	44131186	289788010	Backfat at rump QTL (21206)	1	115698959	115734281	MSTRG.1813.1
1	44131186	289788010	Backfat at rump QTL (21206)	1	138258064	138262930	MSTRG.2297.1
1	44131186	289788010	Backfat at rump QTL (21206)	1	179788962	179799724	MSTRG.2773.1
1	44131186	289788010	Backfat at rump QTL (21206)	1	179796932	179799853	MSTRG.2773.2
1	44131186	289788010	Backfat at rump QTL (21206)	1	213147552	213195062	MSTRG.3379.1
1	44131186	289788010	Backfat at rump QTL (21206)	1	247060447	247069977	MSTRG.3931.1
1	44131186	289788010	Backfat at rump QTL (21206)	1	247062253	247065719	MSTRG.3931.2
1	44131186	289788010	Backfat at rump QTL (21206)	1	264223330	264237373	MSTRG.4184.1
1	44131186	289788010	Backfat at rump QTL (21206)	1	264223330	264237373	MSTRG.4184.2
1	44131186	289788010	Backfat at rump QTL (21206)	1	267187495	267188526	MSTRG.4258.2
1	44131186	289788010	Backfat at rump QTL (21206)	1	267187495	267206909	MSTRG.4258.1
1	44131186	289788010	Backfat at rump QTL (21206)	1	229871932	229955811	MSTRG.3631.1
1	44131186	289788010	Backfat at rump QTL (21206)	1	106933151	106963961	MSTRG.1497.1
1	45762028	290786847	Leaf fat weight QTL (21207)	1	51496270	51499483	MSTRG.834.1
1	45762028	290786847	Leaf fat weight QTL (21207)	1	52447424	52460077	MSTRG.852.1
1	45762028	290786847	Leaf fat weight QTL (21207)	1	107150104	107154187	MSTRG.1509.1
1	45762028	290786847	Leaf fat weight QTL (21207)	1	107150105	107154546	MSTRG.1509.2
1	45762028	290786847	Leaf fat weight QTL (21207)	1	109184403	109189089	MSTRG.1558.1
1	45762028	290786847	Leaf fat weight QTL (21207)	1	109185924	109189089	MSTRG.1558.2
1	45762028	290786847	Leaf fat weight QTL (21207)	1	115698959	115734281	MSTRG.1813.1
1	45762028	290786847	Leaf fat weight QTL (21207)	1	138258064	138262930	MSTRG.2297.1
1	45762028	290786847	Leaf fat weight QTL (21207)	1	179788962	179799724	MSTRG.2773.1
1	45762028	290786847	Leaf fat weight QTL (21207)	1	179796932	179799853	MSTRG.2773.2
1	45762028	290786847	Leaf fat weight QTL (21207)	1	213147552	213195062	MSTRG.3379.1
1	45762028	290786847	Leaf fat weight QTL (21207)	1	247060447	247069977	MSTRG.3931.1
1	45762028	290786847	Leaf fat weight QTL (21207)	1	247062253	247065719	MSTRG.3931.2
1	45762028	290786847	Leaf fat weight QTL (21207)	1	264223330	264237373	MSTRG.4184.1
1	45762028	290786847	Leaf fat weight QTL (21207)	1	264223330	264237373	MSTRG.4184.2
1	45762028	290786847	Leaf fat weight QTL (21207)	1	267187495	267188526	MSTRG.4258.2
1	45762028	290786847	Leaf fat weight QTL (21207)	1	267187495	267206909	MSTRG.4258.1
1	45762028	290786847	Leaf fat weight QTL (21207)	1	229871932	229955811	MSTRG.3631.1
1	45762028	290786847	Leaf fat weight QTL (21207)	1	106933151	106963961	MSTRG.1497.1
1	45939845	292033322	Teat number QTL (5223)	1	51496270	51499483	MSTRG.834.1
1	45939845	292033322	Teat number QTL (5223)	1	52447424	52460077	MSTRG.852.1
1	45939845	292033322	Teat number QTL (5223)	1	107150104	107154187	MSTRG.1509.1
1	45939845	292033322	Teat number QTL (5223)	1	107150105	107154546	MSTRG.1509.2
1	45939845	292033322	Teat number QTL (5223)	1	109184403	109189089	MSTRG.1558.1
1	45939845	292033322	Teat number QTL (5223)	1	109185924	109189089	MSTRG.1558.2
1	45939845	292033322	Teat number QTL (5223)	1	115698959	115734281	MSTRG.1813.1
1	45939845	292033322	Teat number QTL (5223)	1	138258064	138262930	MSTRG.2297.1
1	45939845	292033322	Teat number QTL (5223)	1	179788962	179799724	MSTRG.2773.1
1	45939845	292033322	Teat number QTL (5223)	1	179796932	179799853	MSTRG.2773.2
1	45939845	292033322	Teat number QTL (5223)	1	213147552	213195062	MSTRG.3379.1
1	45939845	292033322	Teat number QTL (5223)	1	247060447	247069977	MSTRG.3931.1
1	45939845	292033322	Teat number QTL (5223)	1	247062253	247065719	MSTRG.3931.2
1	45939845	292033322	Teat number QTL (5223)	1	264223330	264237373	MSTRG.4184.1
1	45939845	292033322	Teat number QTL (5223)	1	264223330	264237373	MSTRG.4184.2
1	45939845	292033322	Teat number QTL (5223)	1	267187495	267188526	MSTRG.4258.2
1	45939845	292033322	Teat number QTL (5223)	1	267187495	267206909	MSTRG.4258.1
1	45939845	292033322	Teat number QTL (5223)	1	229871932	229955811	MSTRG.3631.1
1	45939845	292033322	Teat number QTL (5223)	1	106933151	106963961	MSTRG.1497.1
1	47474632	52874641	Carcass weight (cold) QTL (12708)	1	51496270	51499483	MSTRG.834.1
1	47474632	52874641	Carcass weight (cold) QTL (12708)	1	52447424	52460077	MSTRG.852.1
1	48054350	117332062	Marbling QTL (4019)	1	51496270	51499483	MSTRG.834.1
1	48054350	117332062	Marbling QTL (4019)	1	52447424	52460077	MSTRG.852.1
1	48054350	117332062	Marbling QTL (4019)	1	107150104	107154187	MSTRG.1509.1
1	48054350	117332062	Marbling QTL (4019)	1	107150105	107154546	MSTRG.1509.2
1	48054350	117332062	Marbling QTL (4019)	1	109184403	109189089	MSTRG.1558.1
1	48054350	117332062	Marbling QTL (4019)	1	109185924	109189089	MSTRG.1558.2
1	48054350	117332062	Marbling QTL (4019)	1	115698959	115734281	MSTRG.1813.1
1	48054350	117332062	Marbling QTL (4019)	1	106933151	106963961	MSTRG.1497.1
1	52050713	52916410	Drip loss QTL (7979)	1	52447424	52460077	MSTRG.852.1
1	52050713	52916410	Drip loss QTL (8140)	1	52447424	52460077	MSTRG.852.1
1	52050713	52916410	Drip loss QTL (8165)	1	52447424	52460077	MSTRG.852.1
1	52050713	52916410	Drip loss QTL (8181)	1	52447424	52460077	MSTRG.852.1
1	52050713	52916410	Drip loss QTL (8215)	1	52447424	52460077	MSTRG.852.1
1	52050713	52916410	Drip loss QTL (8254)	1	52447424	52460077	MSTRG.852.1
1	52050713	52916410	Drip loss QTL (7769)	1	52447424	52460077	MSTRG.852.1
1	52050713	52916410	Drip loss QTL (7794)	1	52447424	52460077	MSTRG.852.1
1	52050713	52916410	Drip loss QTL (7816)	1	52447424	52460077	MSTRG.852.1
1	52050713	52916410	Drip loss QTL (7902)	1	52447424	52460077	MSTRG.852.1
1	52050713	52916410	Drip loss QTL (7910)	1	52447424	52460077	MSTRG.852.1
1	52874641	169149638	Liver weight QTL (872)	1	107150104	107154187	MSTRG.1509.1
1	52874641	169149638	Liver weight QTL (872)	1	107150105	107154546	MSTRG.1509.2
1	52874641	169149638	Liver weight QTL (872)	1	109184403	109189089	MSTRG.1558.1
1	52874641	169149638	Liver weight QTL (872)	1	109185924	109189089	MSTRG.1558.2
1	52874641	169149638	Liver weight QTL (872)	1	115698959	115734281	MSTRG.1813.1
1	52874641	169149638	Liver weight QTL (872)	1	138258064	138262930	MSTRG.2297.1
1	52874641	169149638	Liver weight QTL (872)	1	106933151	106963961	MSTRG.1497.1
1	52874641	233806417	External fat on ham QTL (12715)	1	107150104	107154187	MSTRG.1509.1
1	52874641	233806417	External fat on ham QTL (12715)	1	107150105	107154546	MSTRG.1509.2
1	52874641	233806417	External fat on ham QTL (12715)	1	109184403	109189089	MSTRG.1558.1
1	52874641	233806417	External fat on ham QTL (12715)	1	109185924	109189089	MSTRG.1558.2
1	52874641	233806417	External fat on ham QTL (12715)	1	115698959	115734281	MSTRG.1813.1
1	52874641	233806417	External fat on ham QTL (12715)	1	138258064	138262930	MSTRG.2297.1
1	52874641	233806417	External fat on ham QTL (12715)	1	179788962	179799724	MSTRG.2773.1
1	52874641	233806417	External fat on ham QTL (12715)	1	179796932	179799853	MSTRG.2773.2
1	52874641	233806417	External fat on ham QTL (12715)	1	213147552	213195062	MSTRG.3379.1
1	52874641	233806417	External fat on ham QTL (12715)	1	229871932	229955811	MSTRG.3631.1
1	52874641	233806417	External fat on ham QTL (12715)	1	106933151	106963961	MSTRG.1497.1
1	52874641	130756529	Carcass weight (hot) QTL (16859)	1	107150104	107154187	MSTRG.1509.1
1	52874641	130756529	Carcass weight (hot) QTL (16859)	1	107150105	107154546	MSTRG.1509.2
1	52874641	130756529	Carcass weight (hot) QTL (16859)	1	109184403	109189089	MSTRG.1558.1
1	52874641	130756529	Carcass weight (hot) QTL (16859)	1	109185924	109189089	MSTRG.1558.2
1	52874641	130756529	Carcass weight (hot) QTL (16859)	1	115698959	115734281	MSTRG.1813.1
1	52874641	130756529	Carcass weight (hot) QTL (16859)	1	106933151	106963961	MSTRG.1497.1
1	52874641	169149638	Head weight QTL (860)	1	107150104	107154187	MSTRG.1509.1
1	52874641	169149638	Head weight QTL (860)	1	107150105	107154546	MSTRG.1509.2
1	52874641	169149638	Head weight QTL (860)	1	109184403	109189089	MSTRG.1558.1
1	52874641	169149638	Head weight QTL (860)	1	109185924	109189089	MSTRG.1558.2
1	52874641	169149638	Head weight QTL (860)	1	115698959	115734281	MSTRG.1813.1
1	52874641	169149638	Head weight QTL (860)	1	138258064	138262930	MSTRG.2297.1
1	52874641	169149638	Head weight QTL (860)	1	106933151	106963961	MSTRG.1497.1
1	52874641	169149638	Feed intake QTL (871)	1	107150104	107154187	MSTRG.1509.1
1	52874641	169149638	Feed intake QTL (871)	1	107150105	107154546	MSTRG.1509.2
1	52874641	169149638	Feed intake QTL (871)	1	109184403	109189089	MSTRG.1558.1
1	52874641	169149638	Feed intake QTL (871)	1	109185924	109189089	MSTRG.1558.2
1	52874641	169149638	Feed intake QTL (871)	1	115698959	115734281	MSTRG.1813.1
1	52874641	169149638	Feed intake QTL (871)	1	138258064	138262930	MSTRG.2297.1
1	52874641	169149638	Feed intake QTL (871)	1	106933151	106963961	MSTRG.1497.1
1	52874641	233806417	Average daily gain QTL (16886)	1	107150104	107154187	MSTRG.1509.1
1	52874641	233806417	Average daily gain QTL (16886)	1	107150105	107154546	MSTRG.1509.2
1	52874641	233806417	Average daily gain QTL (16886)	1	109184403	109189089	MSTRG.1558.1
1	52874641	233806417	Average daily gain QTL (16886)	1	109185924	109189089	MSTRG.1558.2
1	52874641	233806417	Average daily gain QTL (16886)	1	115698959	115734281	MSTRG.1813.1
1	52874641	233806417	Average daily gain QTL (16886)	1	138258064	138262930	MSTRG.2297.1
1	52874641	233806417	Average daily gain QTL (16886)	1	179788962	179799724	MSTRG.2773.1
1	52874641	233806417	Average daily gain QTL (16886)	1	179796932	179799853	MSTRG.2773.2
1	52874641	233806417	Average daily gain QTL (16886)	1	213147552	213195062	MSTRG.3379.1
1	52874641	233806417	Average daily gain QTL (16886)	1	229871932	229955811	MSTRG.3631.1
1	52874641	233806417	Average daily gain QTL (16886)	1	106933151	106963961	MSTRG.1497.1
1	52874641	169149638	Carcass weight (cold) QTL (12711)	1	107150104	107154187	MSTRG.1509.1
1	52874641	169149638	Carcass weight (cold) QTL (12711)	1	107150105	107154546	MSTRG.1509.2
1	52874641	169149638	Carcass weight (cold) QTL (12711)	1	109184403	109189089	MSTRG.1558.1
1	52874641	169149638	Carcass weight (cold) QTL (12711)	1	109185924	109189089	MSTRG.1558.2
1	52874641	169149638	Carcass weight (cold) QTL (12711)	1	115698959	115734281	MSTRG.1813.1
1	52874641	169149638	Carcass weight (cold) QTL (12711)	1	138258064	138262930	MSTRG.2297.1
1	52874641	169149638	Carcass weight (cold) QTL (12711)	1	106933151	106963961	MSTRG.1497.1
1	52874641	169149638	Backfat weight QTL (12725)	1	107150104	107154187	MSTRG.1509.1
1	52874641	169149638	Backfat weight QTL (12725)	1	107150105	107154546	MSTRG.1509.2
1	52874641	169149638	Backfat weight QTL (12725)	1	109184403	109189089	MSTRG.1558.1
1	52874641	169149638	Backfat weight QTL (12725)	1	109185924	109189089	MSTRG.1558.2
1	52874641	169149638	Backfat weight QTL (12725)	1	115698959	115734281	MSTRG.1813.1
1	52874641	169149638	Backfat weight QTL (12725)	1	138258064	138262930	MSTRG.2297.1
1	52874641	169149638	Backfat weight QTL (12725)	1	106933151	106963961	MSTRG.1497.1
1	52874641	169149638	External fat on ham QTL (12719)	1	107150104	107154187	MSTRG.1509.1
1	52874641	169149638	External fat on ham QTL (12719)	1	107150105	107154546	MSTRG.1509.2
1	52874641	169149638	External fat on ham QTL (12719)	1	109184403	109189089	MSTRG.1558.1
1	52874641	169149638	External fat on ham QTL (12719)	1	109185924	109189089	MSTRG.1558.2
1	52874641	169149638	External fat on ham QTL (12719)	1	115698959	115734281	MSTRG.1813.1
1	52874641	169149638	External fat on ham QTL (12719)	1	138258064	138262930	MSTRG.2297.1
1	52874641	169149638	External fat on ham QTL (12719)	1	106933151	106963961	MSTRG.1497.1
1	62261447	133275468	Average daily gain QTL (3673)	1	107150104	107154187	MSTRG.1509.1
1	62261447	133275468	Average daily gain QTL (3673)	1	107150105	107154546	MSTRG.1509.2
1	62261447	133275468	Average daily gain QTL (3673)	1	109184403	109189089	MSTRG.1558.1
1	62261447	133275468	Average daily gain QTL (3673)	1	109185924	109189089	MSTRG.1558.2
1	62261447	133275468	Average daily gain QTL (3673)	1	115698959	115734281	MSTRG.1813.1
1	62261447	133275468	Average daily gain QTL (3673)	1	106933151	106963961	MSTRG.1497.1
1	62261447	133275468	PH for Longissmus dorsi QTL (3693)	1	107150104	107154187	MSTRG.1509.1
1	62261447	133275468	PH for Longissmus dorsi QTL (3693)	1	107150105	107154546	MSTRG.1509.2
1	62261447	133275468	PH for Longissmus dorsi QTL (3693)	1	109184403	109189089	MSTRG.1558.1
1	62261447	133275468	PH for Longissmus dorsi QTL (3693)	1	109185924	109189089	MSTRG.1558.2
1	62261447	133275468	PH for Longissmus dorsi QTL (3693)	1	115698959	115734281	MSTRG.1813.1
1	62261447	133275468	PH for Longissmus dorsi QTL (3693)	1	106933151	106963961	MSTRG.1497.1
1	62261447	133275468	PH for Longissmus dorsi QTL (3694)	1	107150104	107154187	MSTRG.1509.1
1	62261447	133275468	PH for Longissmus dorsi QTL (3694)	1	107150105	107154546	MSTRG.1509.2
1	62261447	133275468	PH for Longissmus dorsi QTL (3694)	1	109184403	109189089	MSTRG.1558.1
1	62261447	133275468	PH for Longissmus dorsi QTL (3694)	1	109185924	109189089	MSTRG.1558.2
1	62261447	133275468	PH for Longissmus dorsi QTL (3694)	1	115698959	115734281	MSTRG.1813.1
1	62261447	133275468	PH for Longissmus dorsi QTL (3694)	1	106933151	106963961	MSTRG.1497.1
1	62261447	133275468	Carcass weight (hot) QTL (3695)	1	107150104	107154187	MSTRG.1509.1
1	62261447	133275468	Carcass weight (hot) QTL (3695)	1	107150105	107154546	MSTRG.1509.2
1	62261447	133275468	Carcass weight (hot) QTL (3695)	1	109184403	109189089	MSTRG.1558.1
1	62261447	133275468	Carcass weight (hot) QTL (3695)	1	109185924	109189089	MSTRG.1558.2
1	62261447	133275468	Carcass weight (hot) QTL (3695)	1	115698959	115734281	MSTRG.1813.1
1	62261447	133275468	Carcass weight (hot) QTL (3695)	1	106933151	106963961	MSTRG.1497.1
1	62261447	133275468	backfat at P2 position QTL (4108)	1	107150104	107154187	MSTRG.1509.1
1	62261447	133275468	backfat at P2 position QTL (4108)	1	107150105	107154546	MSTRG.1509.2
1	62261447	133275468	backfat at P2 position QTL (4108)	1	109184403	109189089	MSTRG.1558.1
1	62261447	133275468	backfat at P2 position QTL (4108)	1	109185924	109189089	MSTRG.1558.2
1	62261447	133275468	backfat at P2 position QTL (4108)	1	115698959	115734281	MSTRG.1813.1
1	62261447	133275468	backfat at P2 position QTL (4108)	1	106933151	106963961	MSTRG.1497.1
1	62261447	133275468	backfat at P2 position QTL (4107)	1	107150104	107154187	MSTRG.1509.1
1	62261447	133275468	backfat at P2 position QTL (4107)	1	107150105	107154546	MSTRG.1509.2
1	62261447	133275468	backfat at P2 position QTL (4107)	1	109184403	109189089	MSTRG.1558.1
1	62261447	133275468	backfat at P2 position QTL (4107)	1	109185924	109189089	MSTRG.1558.2
1	62261447	133275468	backfat at P2 position QTL (4107)	1	115698959	115734281	MSTRG.1813.1
1	62261447	133275468	backfat at P2 position QTL (4107)	1	106933151	106963961	MSTRG.1497.1
1	62261447	133275468	Lean meat percentage QTL (4109)	1	107150104	107154187	MSTRG.1509.1
1	62261447	133275468	Lean meat percentage QTL (4109)	1	107150105	107154546	MSTRG.1509.2
1	62261447	133275468	Lean meat percentage QTL (4109)	1	109184403	109189089	MSTRG.1558.1
1	62261447	133275468	Lean meat percentage QTL (4109)	1	109185924	109189089	MSTRG.1558.2
1	62261447	133275468	Lean meat percentage QTL (4109)	1	115698959	115734281	MSTRG.1813.1
1	62261447	133275468	Lean meat percentage QTL (4109)	1	106933151	106963961	MSTRG.1497.1
1	62261447	133275468	PH for Longissmus dorsi QTL (4110)	1	107150104	107154187	MSTRG.1509.1
1	62261447	133275468	PH for Longissmus dorsi QTL (4110)	1	107150105	107154546	MSTRG.1509.2
1	62261447	133275468	PH for Longissmus dorsi QTL (4110)	1	109184403	109189089	MSTRG.1558.1
1	62261447	133275468	PH for Longissmus dorsi QTL (4110)	1	109185924	109189089	MSTRG.1558.2
1	62261447	133275468	PH for Longissmus dorsi QTL (4110)	1	115698959	115734281	MSTRG.1813.1
1	62261447	133275468	PH for Longissmus dorsi QTL (4110)	1	106933151	106963961	MSTRG.1497.1
1	62261447	233806417	Front feet conformation QTL (8908)	1	107150104	107154187	MSTRG.1509.1
1	62261447	233806417	Front feet conformation QTL (8908)	1	107150105	107154546	MSTRG.1509.2
1	62261447	233806417	Front feet conformation QTL (8908)	1	109184403	109189089	MSTRG.1558.1
1	62261447	233806417	Front feet conformation QTL (8908)	1	109185924	109189089	MSTRG.1558.2
1	62261447	233806417	Front feet conformation QTL (8908)	1	115698959	115734281	MSTRG.1813.1
1	62261447	233806417	Front feet conformation QTL (8908)	1	138258064	138262930	MSTRG.2297.1
1	62261447	233806417	Front feet conformation QTL (8908)	1	179788962	179799724	MSTRG.2773.1
1	62261447	233806417	Front feet conformation QTL (8908)	1	179796932	179799853	MSTRG.2773.2
1	62261447	233806417	Front feet conformation QTL (8908)	1	213147552	213195062	MSTRG.3379.1
1	62261447	233806417	Front feet conformation QTL (8908)	1	229871932	229955811	MSTRG.3631.1
1	62261447	233806417	Front feet conformation QTL (8908)	1	106933151	106963961	MSTRG.1497.1
1	62261447	162073157	Average daily gain QTL (329)	1	107150104	107154187	MSTRG.1509.1
1	62261447	162073157	Average daily gain QTL (329)	1	107150105	107154546	MSTRG.1509.2
1	62261447	162073157	Average daily gain QTL (329)	1	109184403	109189089	MSTRG.1558.1
1	62261447	162073157	Average daily gain QTL (329)	1	109185924	109189089	MSTRG.1558.2
1	62261447	162073157	Average daily gain QTL (329)	1	115698959	115734281	MSTRG.1813.1
1	62261447	162073157	Average daily gain QTL (329)	1	138258064	138262930	MSTRG.2297.1
1	62261447	162073157	Average daily gain QTL (329)	1	106933151	106963961	MSTRG.1497.1
1	62261447	233806417	Hind leg conformation QTL (8910)	1	107150104	107154187	MSTRG.1509.1
1	62261447	233806417	Hind leg conformation QTL (8910)	1	107150105	107154546	MSTRG.1509.2
1	62261447	233806417	Hind leg conformation QTL (8910)	1	109184403	109189089	MSTRG.1558.1
1	62261447	233806417	Hind leg conformation QTL (8910)	1	109185924	109189089	MSTRG.1558.2
1	62261447	233806417	Hind leg conformation QTL (8910)	1	115698959	115734281	MSTRG.1813.1
1	62261447	233806417	Hind leg conformation QTL (8910)	1	138258064	138262930	MSTRG.2297.1
1	62261447	233806417	Hind leg conformation QTL (8910)	1	179788962	179799724	MSTRG.2773.1
1	62261447	233806417	Hind leg conformation QTL (8910)	1	179796932	179799853	MSTRG.2773.2
1	62261447	233806417	Hind leg conformation QTL (8910)	1	213147552	213195062	MSTRG.3379.1
1	62261447	233806417	Hind leg conformation QTL (8910)	1	229871932	229955811	MSTRG.3631.1
1	62261447	233806417	Hind leg conformation QTL (8910)	1	106933151	106963961	MSTRG.1497.1
1	62261447	233806417	White blood cell counts QTL (611)	1	107150104	107154187	MSTRG.1509.1
1	62261447	233806417	White blood cell counts QTL (611)	1	107150105	107154546	MSTRG.1509.2
1	62261447	233806417	White blood cell counts QTL (611)	1	109184403	109189089	MSTRG.1558.1
1	62261447	233806417	White blood cell counts QTL (611)	1	109185924	109189089	MSTRG.1558.2
1	62261447	233806417	White blood cell counts QTL (611)	1	115698959	115734281	MSTRG.1813.1
1	62261447	233806417	White blood cell counts QTL (611)	1	138258064	138262930	MSTRG.2297.1
1	62261447	233806417	White blood cell counts QTL (611)	1	179788962	179799724	MSTRG.2773.1
1	62261447	233806417	White blood cell counts QTL (611)	1	179796932	179799853	MSTRG.2773.2
1	62261447	233806417	White blood cell counts QTL (611)	1	213147552	213195062	MSTRG.3379.1
1	62261447	233806417	White blood cell counts QTL (611)	1	229871932	229955811	MSTRG.3631.1
1	62261447	233806417	White blood cell counts QTL (611)	1	106933151	106963961	MSTRG.1497.1
1	63012552	226764071	Creatinine level QTL (6366)	1	107150104	107154187	MSTRG.1509.1
1	63012552	226764071	Creatinine level QTL (6366)	1	107150105	107154546	MSTRG.1509.2
1	63012552	226764071	Creatinine level QTL (6366)	1	109184403	109189089	MSTRG.1558.1
1	63012552	226764071	Creatinine level QTL (6366)	1	109185924	109189089	MSTRG.1558.2
1	63012552	226764071	Creatinine level QTL (6366)	1	115698959	115734281	MSTRG.1813.1
1	63012552	226764071	Creatinine level QTL (6366)	1	138258064	138262930	MSTRG.2297.1
1	63012552	226764071	Creatinine level QTL (6366)	1	179788962	179799724	MSTRG.2773.1
1	63012552	226764071	Creatinine level QTL (6366)	1	179796932	179799853	MSTRG.2773.2
1	63012552	226764071	Creatinine level QTL (6366)	1	213147552	213195062	MSTRG.3379.1
1	63012552	226764071	Creatinine level QTL (6366)	1	106933151	106963961	MSTRG.1497.1
1	63012552	226764071	Potassium level QTL (6380)	1	107150104	107154187	MSTRG.1509.1
1	63012552	226764071	Potassium level QTL (6380)	1	107150105	107154546	MSTRG.1509.2
1	63012552	226764071	Potassium level QTL (6380)	1	109184403	109189089	MSTRG.1558.1
1	63012552	226764071	Potassium level QTL (6380)	1	109185924	109189089	MSTRG.1558.2
1	63012552	226764071	Potassium level QTL (6380)	1	115698959	115734281	MSTRG.1813.1
1	63012552	226764071	Potassium level QTL (6380)	1	138258064	138262930	MSTRG.2297.1
1	63012552	226764071	Potassium level QTL (6380)	1	179788962	179799724	MSTRG.2773.1
1	63012552	226764071	Potassium level QTL (6380)	1	179796932	179799853	MSTRG.2773.2
1	63012552	226764071	Potassium level QTL (6380)	1	213147552	213195062	MSTRG.3379.1
1	63012552	226764071	Potassium level QTL (6380)	1	106933151	106963961	MSTRG.1497.1
1	63012552	226764071	Hematocrit QTL (5420)	1	107150104	107154187	MSTRG.1509.1
1	63012552	226764071	Hematocrit QTL (5420)	1	107150105	107154546	MSTRG.1509.2
1	63012552	226764071	Hematocrit QTL (5420)	1	109184403	109189089	MSTRG.1558.1
1	63012552	226764071	Hematocrit QTL (5420)	1	109185924	109189089	MSTRG.1558.2
1	63012552	226764071	Hematocrit QTL (5420)	1	115698959	115734281	MSTRG.1813.1
1	63012552	226764071	Hematocrit QTL (5420)	1	138258064	138262930	MSTRG.2297.1
1	63012552	226764071	Hematocrit QTL (5420)	1	179788962	179799724	MSTRG.2773.1
1	63012552	226764071	Hematocrit QTL (5420)	1	179796932	179799853	MSTRG.2773.2
1	63012552	226764071	Hematocrit QTL (5420)	1	213147552	213195062	MSTRG.3379.1
1	63012552	226764071	Hematocrit QTL (5420)	1	106933151	106963961	MSTRG.1497.1
1	63012552	226764071	Lymphocyte number QTL (5468)	1	107150104	107154187	MSTRG.1509.1
1	63012552	226764071	Lymphocyte number QTL (5468)	1	107150105	107154546	MSTRG.1509.2
1	63012552	226764071	Lymphocyte number QTL (5468)	1	109184403	109189089	MSTRG.1558.1
1	63012552	226764071	Lymphocyte number QTL (5468)	1	109185924	109189089	MSTRG.1558.2
1	63012552	226764071	Lymphocyte number QTL (5468)	1	115698959	115734281	MSTRG.1813.1
1	63012552	226764071	Lymphocyte number QTL (5468)	1	138258064	138262930	MSTRG.2297.1
1	63012552	226764071	Lymphocyte number QTL (5468)	1	179788962	179799724	MSTRG.2773.1
1	63012552	226764071	Lymphocyte number QTL (5468)	1	179796932	179799853	MSTRG.2773.2
1	63012552	226764071	Lymphocyte number QTL (5468)	1	213147552	213195062	MSTRG.3379.1
1	63012552	226764071	Lymphocyte number QTL (5468)	1	106933151	106963961	MSTRG.1497.1
1	70361295	292707685	backfat at mid-back QTL (5206)	1	107150104	107154187	MSTRG.1509.1
1	70361295	292707685	backfat at mid-back QTL (5206)	1	107150105	107154546	MSTRG.1509.2
1	70361295	292707685	backfat at mid-back QTL (5206)	1	109184403	109189089	MSTRG.1558.1
1	70361295	292707685	backfat at mid-back QTL (5206)	1	109185924	109189089	MSTRG.1558.2
1	70361295	292707685	backfat at mid-back QTL (5206)	1	115698959	115734281	MSTRG.1813.1
1	70361295	292707685	backfat at mid-back QTL (5206)	1	138258064	138262930	MSTRG.2297.1
1	70361295	292707685	backfat at mid-back QTL (5206)	1	179788962	179799724	MSTRG.2773.1
1	70361295	292707685	backfat at mid-back QTL (5206)	1	179796932	179799853	MSTRG.2773.2
1	70361295	292707685	backfat at mid-back QTL (5206)	1	213147552	213195062	MSTRG.3379.1
1	70361295	292707685	backfat at mid-back QTL (5206)	1	247060447	247069977	MSTRG.3931.1
1	70361295	292707685	backfat at mid-back QTL (5206)	1	247062253	247065719	MSTRG.3931.2
1	70361295	292707685	backfat at mid-back QTL (5206)	1	264223330	264237373	MSTRG.4184.1
1	70361295	292707685	backfat at mid-back QTL (5206)	1	264223330	264237373	MSTRG.4184.2
1	70361295	292707685	backfat at mid-back QTL (5206)	1	267187495	267188526	MSTRG.4258.2
1	70361295	292707685	backfat at mid-back QTL (5206)	1	267187495	267206909	MSTRG.4258.1
1	70361295	292707685	backfat at mid-back QTL (5206)	1	229871932	229955811	MSTRG.3631.1
1	70361295	292707685	backfat at mid-back QTL (5206)	1	106933151	106963961	MSTRG.1497.1
1	77611099	234035171	Loin muscle depth QTL (29579)	1	107150104	107154187	MSTRG.1509.1
1	77611099	234035171	Loin muscle depth QTL (29579)	1	107150105	107154546	MSTRG.1509.2
1	77611099	234035171	Loin muscle depth QTL (29579)	1	109184403	109189089	MSTRG.1558.1
1	77611099	234035171	Loin muscle depth QTL (29579)	1	109185924	109189089	MSTRG.1558.2
1	77611099	234035171	Loin muscle depth QTL (29579)	1	115698959	115734281	MSTRG.1813.1
1	77611099	234035171	Loin muscle depth QTL (29579)	1	138258064	138262930	MSTRG.2297.1
1	77611099	234035171	Loin muscle depth QTL (29579)	1	179788962	179799724	MSTRG.2773.1
1	77611099	234035171	Loin muscle depth QTL (29579)	1	179796932	179799853	MSTRG.2773.2
1	77611099	234035171	Loin muscle depth QTL (29579)	1	213147552	213195062	MSTRG.3379.1
1	77611099	234035171	Loin muscle depth QTL (29579)	1	229871932	229955811	MSTRG.3631.1
1	77611099	234035171	Loin muscle depth QTL (29579)	1	106933151	106963961	MSTRG.1497.1
1	85842604	162073157	Ear weight QTL (8853)	1	107150104	107154187	MSTRG.1509.1
1	85842604	162073157	Ear weight QTL (8853)	1	107150105	107154546	MSTRG.1509.2
1	85842604	162073157	Ear weight QTL (8853)	1	109184403	109189089	MSTRG.1558.1
1	85842604	162073157	Ear weight QTL (8853)	1	109185924	109189089	MSTRG.1558.2
1	85842604	162073157	Ear weight QTL (8853)	1	115698959	115734281	MSTRG.1813.1
1	85842604	162073157	Ear weight QTL (8853)	1	138258064	138262930	MSTRG.2297.1
1	85842604	162073157	Ear weight QTL (8853)	1	106933151	106963961	MSTRG.1497.1
1	85842604	162073157	Ear area QTL (8886)	1	107150104	107154187	MSTRG.1509.1
1	85842604	162073157	Ear area QTL (8886)	1	107150105	107154546	MSTRG.1509.2
1	85842604	162073157	Ear area QTL (8886)	1	109184403	109189089	MSTRG.1558.1
1	85842604	162073157	Ear area QTL (8886)	1	109185924	109189089	MSTRG.1558.2
1	85842604	162073157	Ear area QTL (8886)	1	115698959	115734281	MSTRG.1813.1
1	85842604	162073157	Ear area QTL (8886)	1	138258064	138262930	MSTRG.2297.1
1	85842604	162073157	Ear area QTL (8886)	1	106933151	106963961	MSTRG.1497.1
1	85842604	162073157	Ear area QTL (8885)	1	107150104	107154187	MSTRG.1509.1
1	85842604	162073157	Ear area QTL (8885)	1	107150105	107154546	MSTRG.1509.2
1	85842604	162073157	Ear area QTL (8885)	1	109184403	109189089	MSTRG.1558.1
1	85842604	162073157	Ear area QTL (8885)	1	109185924	109189089	MSTRG.1558.2
1	85842604	162073157	Ear area QTL (8885)	1	115698959	115734281	MSTRG.1813.1
1	85842604	162073157	Ear area QTL (8885)	1	138258064	138262930	MSTRG.2297.1
1	85842604	162073157	Ear area QTL (8885)	1	106933151	106963961	MSTRG.1497.1
1	85842604	162073157	Ear weight QTL (8854)	1	107150104	107154187	MSTRG.1509.1
1	85842604	162073157	Ear weight QTL (8854)	1	107150105	107154546	MSTRG.1509.2
1	85842604	162073157	Ear weight QTL (8854)	1	109184403	109189089	MSTRG.1558.1
1	85842604	162073157	Ear weight QTL (8854)	1	109185924	109189089	MSTRG.1558.2
1	85842604	162073157	Ear weight QTL (8854)	1	115698959	115734281	MSTRG.1813.1
1	85842604	162073157	Ear weight QTL (8854)	1	138258064	138262930	MSTRG.2297.1
1	85842604	162073157	Ear weight QTL (8854)	1	106933151	106963961	MSTRG.1497.1
1	85842604	162073157	Teat number QTL (6481)	1	107150104	107154187	MSTRG.1509.1
1	85842604	162073157	Teat number QTL (6481)	1	107150105	107154546	MSTRG.1509.2
1	85842604	162073157	Teat number QTL (6481)	1	109184403	109189089	MSTRG.1558.1
1	85842604	162073157	Teat number QTL (6481)	1	109185924	109189089	MSTRG.1558.2
1	85842604	162073157	Teat number QTL (6481)	1	115698959	115734281	MSTRG.1813.1
1	85842604	162073157	Teat number QTL (6481)	1	138258064	138262930	MSTRG.2297.1
1	85842604	162073157	Teat number QTL (6481)	1	106933151	106963961	MSTRG.1497.1
1	85842604	257944209	Backfat at rump QTL (651)	1	107150104	107154187	MSTRG.1509.1
1	85842604	257944209	Backfat at rump QTL (651)	1	107150105	107154546	MSTRG.1509.2
1	85842604	257944209	Backfat at rump QTL (651)	1	109184403	109189089	MSTRG.1558.1
1	85842604	257944209	Backfat at rump QTL (651)	1	109185924	109189089	MSTRG.1558.2
1	85842604	257944209	Backfat at rump QTL (651)	1	115698959	115734281	MSTRG.1813.1
1	85842604	257944209	Backfat at rump QTL (651)	1	138258064	138262930	MSTRG.2297.1
1	85842604	257944209	Backfat at rump QTL (651)	1	179788962	179799724	MSTRG.2773.1
1	85842604	257944209	Backfat at rump QTL (651)	1	179796932	179799853	MSTRG.2773.2
1	85842604	257944209	Backfat at rump QTL (651)	1	213147552	213195062	MSTRG.3379.1
1	85842604	257944209	Backfat at rump QTL (651)	1	247060447	247069977	MSTRG.3931.1
1	85842604	257944209	Backfat at rump QTL (651)	1	247062253	247065719	MSTRG.3931.2
1	85842604	257944209	Backfat at rump QTL (651)	1	229871932	229955811	MSTRG.3631.1
1	85842604	257944209	Backfat at rump QTL (651)	1	106933151	106963961	MSTRG.1497.1
1	96293184	142302138	Meat color L* QTL (4326)	1	107150104	107154187	MSTRG.1509.1
1	96293184	142302138	Meat color L* QTL (4326)	1	107150105	107154546	MSTRG.1509.2
1	96293184	142302138	Meat color L* QTL (4326)	1	109184403	109189089	MSTRG.1558.1
1	96293184	142302138	Meat color L* QTL (4326)	1	109185924	109189089	MSTRG.1558.2
1	96293184	142302138	Meat color L* QTL (4326)	1	115698959	115734281	MSTRG.1813.1
1	96293184	142302138	Meat color L* QTL (4326)	1	138258064	138262930	MSTRG.2297.1
1	96293184	142302138	Meat color L* QTL (4326)	1	106933151	106963961	MSTRG.1497.1
1	96293184	247820666	Belly weight QTL (2845)	1	107150104	107154187	MSTRG.1509.1
1	96293184	247820666	Belly weight QTL (2845)	1	107150105	107154546	MSTRG.1509.2
1	96293184	247820666	Belly weight QTL (2845)	1	109184403	109189089	MSTRG.1558.1
1	96293184	247820666	Belly weight QTL (2845)	1	109185924	109189089	MSTRG.1558.2
1	96293184	247820666	Belly weight QTL (2845)	1	115698959	115734281	MSTRG.1813.1
1	96293184	247820666	Belly weight QTL (2845)	1	138258064	138262930	MSTRG.2297.1
1	96293184	247820666	Belly weight QTL (2845)	1	179788962	179799724	MSTRG.2773.1
1	96293184	247820666	Belly weight QTL (2845)	1	179796932	179799853	MSTRG.2773.2
1	96293184	247820666	Belly weight QTL (2845)	1	213147552	213195062	MSTRG.3379.1
1	96293184	247820666	Belly weight QTL (2845)	1	247060447	247069977	MSTRG.3931.1
1	96293184	247820666	Belly weight QTL (2845)	1	247062253	247065719	MSTRG.3931.2
1	96293184	247820666	Belly weight QTL (2845)	1	229871932	229955811	MSTRG.3631.1
1	96293184	247820666	Belly weight QTL (2845)	1	106933151	106963961	MSTRG.1497.1
1	103891575	112246100	Linoleic acid content QTL (32101)	1	107150104	107154187	MSTRG.1509.1
1	103891575	112246100	Linoleic acid content QTL (32101)	1	107150105	107154546	MSTRG.1509.2
1	103891575	112246100	Linoleic acid content QTL (32101)	1	109184403	109189089	MSTRG.1558.1
1	103891575	112246100	Linoleic acid content QTL (32101)	1	109185924	109189089	MSTRG.1558.2
1	103891575	112246100	Linoleic acid content QTL (32101)	1	106933151	106963961	MSTRG.1497.1
1	105086765	169149638	Marbling QTL (2930)	1	107150104	107154187	MSTRG.1509.1
1	105086765	169149638	Marbling QTL (2930)	1	107150105	107154546	MSTRG.1509.2
1	105086765	169149638	Marbling QTL (2930)	1	109184403	109189089	MSTRG.1558.1
1	105086765	169149638	Marbling QTL (2930)	1	109185924	109189089	MSTRG.1558.2
1	105086765	169149638	Marbling QTL (2930)	1	115698959	115734281	MSTRG.1813.1
1	105086765	169149638	Marbling QTL (2930)	1	138258064	138262930	MSTRG.2297.1
1	105086765	169149638	Marbling QTL (2930)	1	106933151	106963961	MSTRG.1497.1
1	105086765	154329026	Cholesterol level QTL (17711)	1	107150104	107154187	MSTRG.1509.1
1	105086765	154329026	Cholesterol level QTL (17711)	1	107150105	107154546	MSTRG.1509.2
1	105086765	154329026	Cholesterol level QTL (17711)	1	109184403	109189089	MSTRG.1558.1
1	105086765	154329026	Cholesterol level QTL (17711)	1	109185924	109189089	MSTRG.1558.2
1	105086765	154329026	Cholesterol level QTL (17711)	1	115698959	115734281	MSTRG.1813.1
1	105086765	154329026	Cholesterol level QTL (17711)	1	138258064	138262930	MSTRG.2297.1
1	105086765	154329026	Cholesterol level QTL (17711)	1	106933151	106963961	MSTRG.1497.1
1	105086765	154329026	HDL/LDL ratio QTL (17712)	1	107150104	107154187	MSTRG.1509.1
1	105086765	154329026	HDL/LDL ratio QTL (17712)	1	107150105	107154546	MSTRG.1509.2
1	105086765	154329026	HDL/LDL ratio QTL (17712)	1	109184403	109189089	MSTRG.1558.1
1	105086765	154329026	HDL/LDL ratio QTL (17712)	1	109185924	109189089	MSTRG.1558.2
1	105086765	154329026	HDL/LDL ratio QTL (17712)	1	115698959	115734281	MSTRG.1813.1
1	105086765	154329026	HDL/LDL ratio QTL (17712)	1	138258064	138262930	MSTRG.2297.1
1	105086765	154329026	HDL/LDL ratio QTL (17712)	1	106933151	106963961	MSTRG.1497.1
1	105086765	154329026	LDL cholesterol QTL (17713)	1	107150104	107154187	MSTRG.1509.1
1	105086765	154329026	LDL cholesterol QTL (17713)	1	107150105	107154546	MSTRG.1509.2
1	105086765	154329026	LDL cholesterol QTL (17713)	1	109184403	109189089	MSTRG.1558.1
1	105086765	154329026	LDL cholesterol QTL (17713)	1	109185924	109189089	MSTRG.1558.2
1	105086765	154329026	LDL cholesterol QTL (17713)	1	115698959	115734281	MSTRG.1813.1
1	105086765	154329026	LDL cholesterol QTL (17713)	1	138258064	138262930	MSTRG.2297.1
1	105086765	154329026	LDL cholesterol QTL (17713)	1	106933151	106963961	MSTRG.1497.1
1	105086765	274130998	Conductivity 24 hours postmortem (ham) QTL (5669)	1	107150104	107154187	MSTRG.1509.1
1	105086765	274130998	Conductivity 24 hours postmortem (ham) QTL (5669)	1	107150105	107154546	MSTRG.1509.2
1	105086765	274130998	Conductivity 24 hours postmortem (ham) QTL (5669)	1	109184403	109189089	MSTRG.1558.1
1	105086765	274130998	Conductivity 24 hours postmortem (ham) QTL (5669)	1	109185924	109189089	MSTRG.1558.2
1	105086765	274130998	Conductivity 24 hours postmortem (ham) QTL (5669)	1	115698959	115734281	MSTRG.1813.1
1	105086765	274130998	Conductivity 24 hours postmortem (ham) QTL (5669)	1	138258064	138262930	MSTRG.2297.1
1	105086765	274130998	Conductivity 24 hours postmortem (ham) QTL (5669)	1	179788962	179799724	MSTRG.2773.1
1	105086765	274130998	Conductivity 24 hours postmortem (ham) QTL (5669)	1	179796932	179799853	MSTRG.2773.2
1	105086765	274130998	Conductivity 24 hours postmortem (ham) QTL (5669)	1	213147552	213195062	MSTRG.3379.1
1	105086765	274130998	Conductivity 24 hours postmortem (ham) QTL (5669)	1	247060447	247069977	MSTRG.3931.1
1	105086765	274130998	Conductivity 24 hours postmortem (ham) QTL (5669)	1	247062253	247065719	MSTRG.3931.2
1	105086765	274130998	Conductivity 24 hours postmortem (ham) QTL (5669)	1	264223330	264237373	MSTRG.4184.1
1	105086765	274130998	Conductivity 24 hours postmortem (ham) QTL (5669)	1	264223330	264237373	MSTRG.4184.2
1	105086765	274130998	Conductivity 24 hours postmortem (ham) QTL (5669)	1	267187495	267188526	MSTRG.4258.2
1	105086765	274130998	Conductivity 24 hours postmortem (ham) QTL (5669)	1	267187495	267206909	MSTRG.4258.1
1	105086765	274130998	Conductivity 24 hours postmortem (ham) QTL (5669)	1	229871932	229955811	MSTRG.3631.1
1	105086765	274130998	Conductivity 24 hours postmortem (ham) QTL (5669)	1	106933151	106963961	MSTRG.1497.1
1	105086765	154329026	Average daily gain QTL (5928)	1	107150104	107154187	MSTRG.1509.1
1	105086765	154329026	Average daily gain QTL (5928)	1	107150105	107154546	MSTRG.1509.2
1	105086765	154329026	Average daily gain QTL (5928)	1	109184403	109189089	MSTRG.1558.1
1	105086765	154329026	Average daily gain QTL (5928)	1	109185924	109189089	MSTRG.1558.2
1	105086765	154329026	Average daily gain QTL (5928)	1	115698959	115734281	MSTRG.1813.1
1	105086765	154329026	Average daily gain QTL (5928)	1	138258064	138262930	MSTRG.2297.1
1	105086765	154329026	Average daily gain QTL (5928)	1	106933151	106963961	MSTRG.1497.1
1	105086765	154329026	Body weight (weaning) QTL (5931)	1	107150104	107154187	MSTRG.1509.1
1	105086765	154329026	Body weight (weaning) QTL (5931)	1	107150105	107154546	MSTRG.1509.2
1	105086765	154329026	Body weight (weaning) QTL (5931)	1	109184403	109189089	MSTRG.1558.1
1	105086765	154329026	Body weight (weaning) QTL (5931)	1	109185924	109189089	MSTRG.1558.2
1	105086765	154329026	Body weight (weaning) QTL (5931)	1	115698959	115734281	MSTRG.1813.1
1	105086765	154329026	Body weight (weaning) QTL (5931)	1	138258064	138262930	MSTRG.2297.1
1	105086765	154329026	Body weight (weaning) QTL (5931)	1	106933151	106963961	MSTRG.1497.1
1	105086765	210644363	PH for Longissmus dorsi QTL (5664)	1	107150104	107154187	MSTRG.1509.1
1	105086765	210644363	PH for Longissmus dorsi QTL (5664)	1	107150105	107154546	MSTRG.1509.2
1	105086765	210644363	PH for Longissmus dorsi QTL (5664)	1	109184403	109189089	MSTRG.1558.1
1	105086765	210644363	PH for Longissmus dorsi QTL (5664)	1	109185924	109189089	MSTRG.1558.2
1	105086765	210644363	PH for Longissmus dorsi QTL (5664)	1	115698959	115734281	MSTRG.1813.1
1	105086765	210644363	PH for Longissmus dorsi QTL (5664)	1	138258064	138262930	MSTRG.2297.1
1	105086765	210644363	PH for Longissmus dorsi QTL (5664)	1	179788962	179799724	MSTRG.2773.1
1	105086765	210644363	PH for Longissmus dorsi QTL (5664)	1	179796932	179799853	MSTRG.2773.2
1	105086765	210644363	PH for Longissmus dorsi QTL (5664)	1	106933151	106963961	MSTRG.1497.1
1	105086765	210644363	pH for Semimembranosus QTL (5665)	1	107150104	107154187	MSTRG.1509.1
1	105086765	210644363	pH for Semimembranosus QTL (5665)	1	107150105	107154546	MSTRG.1509.2
1	105086765	210644363	pH for Semimembranosus QTL (5665)	1	109184403	109189089	MSTRG.1558.1
1	105086765	210644363	pH for Semimembranosus QTL (5665)	1	109185924	109189089	MSTRG.1558.2
1	105086765	210644363	pH for Semimembranosus QTL (5665)	1	115698959	115734281	MSTRG.1813.1
1	105086765	210644363	pH for Semimembranosus QTL (5665)	1	138258064	138262930	MSTRG.2297.1
1	105086765	210644363	pH for Semimembranosus QTL (5665)	1	179788962	179799724	MSTRG.2773.1
1	105086765	210644363	pH for Semimembranosus QTL (5665)	1	179796932	179799853	MSTRG.2773.2
1	105086765	210644363	pH for Semimembranosus QTL (5665)	1	106933151	106963961	MSTRG.1497.1
1	105086765	210644363	PH for Longissmus dorsi QTL (5666)	1	107150104	107154187	MSTRG.1509.1
1	105086765	210644363	PH for Longissmus dorsi QTL (5666)	1	107150105	107154546	MSTRG.1509.2
1	105086765	210644363	PH for Longissmus dorsi QTL (5666)	1	109184403	109189089	MSTRG.1558.1
1	105086765	210644363	PH for Longissmus dorsi QTL (5666)	1	109185924	109189089	MSTRG.1558.2
1	105086765	210644363	PH for Longissmus dorsi QTL (5666)	1	115698959	115734281	MSTRG.1813.1
1	105086765	210644363	PH for Longissmus dorsi QTL (5666)	1	138258064	138262930	MSTRG.2297.1
1	105086765	210644363	PH for Longissmus dorsi QTL (5666)	1	179788962	179799724	MSTRG.2773.1
1	105086765	210644363	PH for Longissmus dorsi QTL (5666)	1	179796932	179799853	MSTRG.2773.2
1	105086765	210644363	PH for Longissmus dorsi QTL (5666)	1	106933151	106963961	MSTRG.1497.1
1	105086765	210644363	Conductivity 24 hours postmortem (loin) QTL (5668)	1	107150104	107154187	MSTRG.1509.1
1	105086765	210644363	Conductivity 24 hours postmortem (loin) QTL (5668)	1	107150105	107154546	MSTRG.1509.2
1	105086765	210644363	Conductivity 24 hours postmortem (loin) QTL (5668)	1	109184403	109189089	MSTRG.1558.1
1	105086765	210644363	Conductivity 24 hours postmortem (loin) QTL (5668)	1	109185924	109189089	MSTRG.1558.2
1	105086765	210644363	Conductivity 24 hours postmortem (loin) QTL (5668)	1	115698959	115734281	MSTRG.1813.1
1	105086765	210644363	Conductivity 24 hours postmortem (loin) QTL (5668)	1	138258064	138262930	MSTRG.2297.1
1	105086765	210644363	Conductivity 24 hours postmortem (loin) QTL (5668)	1	179788962	179799724	MSTRG.2773.1
1	105086765	210644363	Conductivity 24 hours postmortem (loin) QTL (5668)	1	179796932	179799853	MSTRG.2773.2
1	105086765	210644363	Conductivity 24 hours postmortem (loin) QTL (5668)	1	106933151	106963961	MSTRG.1497.1
1	105086765	228164160	Loin muscle area QTL (3796)	1	107150104	107154187	MSTRG.1509.1
1	105086765	228164160	Loin muscle area QTL (3796)	1	107150105	107154546	MSTRG.1509.2
1	105086765	228164160	Loin muscle area QTL (3796)	1	109184403	109189089	MSTRG.1558.1
1	105086765	228164160	Loin muscle area QTL (3796)	1	109185924	109189089	MSTRG.1558.2
1	105086765	228164160	Loin muscle area QTL (3796)	1	115698959	115734281	MSTRG.1813.1
1	105086765	228164160	Loin muscle area QTL (3796)	1	138258064	138262930	MSTRG.2297.1
1	105086765	228164160	Loin muscle area QTL (3796)	1	179788962	179799724	MSTRG.2773.1
1	105086765	228164160	Loin muscle area QTL (3796)	1	179796932	179799853	MSTRG.2773.2
1	105086765	228164160	Loin muscle area QTL (3796)	1	213147552	213195062	MSTRG.3379.1
1	105086765	228164160	Loin muscle area QTL (3796)	1	106933151	106963961	MSTRG.1497.1
1	105086765	274130998	Backfat at last rib QTL (3794)	1	107150104	107154187	MSTRG.1509.1
1	105086765	274130998	Backfat at last rib QTL (3794)	1	107150105	107154546	MSTRG.1509.2
1	105086765	274130998	Backfat at last rib QTL (3794)	1	109184403	109189089	MSTRG.1558.1
1	105086765	274130998	Backfat at last rib QTL (3794)	1	109185924	109189089	MSTRG.1558.2
1	105086765	274130998	Backfat at last rib QTL (3794)	1	115698959	115734281	MSTRG.1813.1
1	105086765	274130998	Backfat at last rib QTL (3794)	1	138258064	138262930	MSTRG.2297.1
1	105086765	274130998	Backfat at last rib QTL (3794)	1	179788962	179799724	MSTRG.2773.1
1	105086765	274130998	Backfat at last rib QTL (3794)	1	179796932	179799853	MSTRG.2773.2
1	105086765	274130998	Backfat at last rib QTL (3794)	1	213147552	213195062	MSTRG.3379.1
1	105086765	274130998	Backfat at last rib QTL (3794)	1	247060447	247069977	MSTRG.3931.1
1	105086765	274130998	Backfat at last rib QTL (3794)	1	247062253	247065719	MSTRG.3931.2
1	105086765	274130998	Backfat at last rib QTL (3794)	1	264223330	264237373	MSTRG.4184.1
1	105086765	274130998	Backfat at last rib QTL (3794)	1	264223330	264237373	MSTRG.4184.2
1	105086765	274130998	Backfat at last rib QTL (3794)	1	267187495	267188526	MSTRG.4258.2
1	105086765	274130998	Backfat at last rib QTL (3794)	1	267187495	267206909	MSTRG.4258.1
1	105086765	274130998	Backfat at last rib QTL (3794)	1	229871932	229955811	MSTRG.3631.1
1	105086765	274130998	Backfat at last rib QTL (3794)	1	106933151	106963961	MSTRG.1497.1
1	105086765	228164160	Backfat at tenth rib QTL (3795)	1	107150104	107154187	MSTRG.1509.1
1	105086765	228164160	Backfat at tenth rib QTL (3795)	1	107150105	107154546	MSTRG.1509.2
1	105086765	228164160	Backfat at tenth rib QTL (3795)	1	109184403	109189089	MSTRG.1558.1
1	105086765	228164160	Backfat at tenth rib QTL (3795)	1	109185924	109189089	MSTRG.1558.2
1	105086765	228164160	Backfat at tenth rib QTL (3795)	1	115698959	115734281	MSTRG.1813.1
1	105086765	228164160	Backfat at tenth rib QTL (3795)	1	138258064	138262930	MSTRG.2297.1
1	105086765	228164160	Backfat at tenth rib QTL (3795)	1	179788962	179799724	MSTRG.2773.1
1	105086765	228164160	Backfat at tenth rib QTL (3795)	1	179796932	179799853	MSTRG.2773.2
1	105086765	228164160	Backfat at tenth rib QTL (3795)	1	213147552	213195062	MSTRG.3379.1
1	105086765	228164160	Backfat at tenth rib QTL (3795)	1	106933151	106963961	MSTRG.1497.1
1	105086765	274130998	Average backfat thickness QTL (3793)	1	107150104	107154187	MSTRG.1509.1
1	105086765	274130998	Average backfat thickness QTL (3793)	1	107150105	107154546	MSTRG.1509.2
1	105086765	274130998	Average backfat thickness QTL (3793)	1	109184403	109189089	MSTRG.1558.1
1	105086765	274130998	Average backfat thickness QTL (3793)	1	109185924	109189089	MSTRG.1558.2
1	105086765	274130998	Average backfat thickness QTL (3793)	1	115698959	115734281	MSTRG.1813.1
1	105086765	274130998	Average backfat thickness QTL (3793)	1	138258064	138262930	MSTRG.2297.1
1	105086765	274130998	Average backfat thickness QTL (3793)	1	179788962	179799724	MSTRG.2773.1
1	105086765	274130998	Average backfat thickness QTL (3793)	1	179796932	179799853	MSTRG.2773.2
1	105086765	274130998	Average backfat thickness QTL (3793)	1	213147552	213195062	MSTRG.3379.1
1	105086765	274130998	Average backfat thickness QTL (3793)	1	247060447	247069977	MSTRG.3931.1
1	105086765	274130998	Average backfat thickness QTL (3793)	1	247062253	247065719	MSTRG.3931.2
1	105086765	274130998	Average backfat thickness QTL (3793)	1	264223330	264237373	MSTRG.4184.1
1	105086765	274130998	Average backfat thickness QTL (3793)	1	264223330	264237373	MSTRG.4184.2
1	105086765	274130998	Average backfat thickness QTL (3793)	1	267187495	267188526	MSTRG.4258.2
1	105086765	274130998	Average backfat thickness QTL (3793)	1	267187495	267206909	MSTRG.4258.1
1	105086765	274130998	Average backfat thickness QTL (3793)	1	229871932	229955811	MSTRG.3631.1
1	105086765	274130998	Average backfat thickness QTL (3793)	1	106933151	106963961	MSTRG.1497.1
1	105086765	252283830	Meat color OPTO QTL (5667)	1	107150104	107154187	MSTRG.1509.1
1	105086765	252283830	Meat color OPTO QTL (5667)	1	107150105	107154546	MSTRG.1509.2
1	105086765	252283830	Meat color OPTO QTL (5667)	1	109184403	109189089	MSTRG.1558.1
1	105086765	252283830	Meat color OPTO QTL (5667)	1	109185924	109189089	MSTRG.1558.2
1	105086765	252283830	Meat color OPTO QTL (5667)	1	115698959	115734281	MSTRG.1813.1
1	105086765	252283830	Meat color OPTO QTL (5667)	1	138258064	138262930	MSTRG.2297.1
1	105086765	252283830	Meat color OPTO QTL (5667)	1	179788962	179799724	MSTRG.2773.1
1	105086765	252283830	Meat color OPTO QTL (5667)	1	179796932	179799853	MSTRG.2773.2
1	105086765	252283830	Meat color OPTO QTL (5667)	1	213147552	213195062	MSTRG.3379.1
1	105086765	252283830	Meat color OPTO QTL (5667)	1	247060447	247069977	MSTRG.3931.1
1	105086765	252283830	Meat color OPTO QTL (5667)	1	247062253	247065719	MSTRG.3931.2
1	105086765	252283830	Meat color OPTO QTL (5667)	1	229871932	229955811	MSTRG.3631.1
1	105086765	252283830	Meat color OPTO QTL (5667)	1	106933151	106963961	MSTRG.1497.1
1	105873529	290457491	Teat number QTL (5255)	1	107150104	107154187	MSTRG.1509.1
1	105873529	290457491	Teat number QTL (5255)	1	107150105	107154546	MSTRG.1509.2
1	105873529	290457491	Teat number QTL (5255)	1	109184403	109189089	MSTRG.1558.1
1	105873529	290457491	Teat number QTL (5255)	1	109185924	109189089	MSTRG.1558.2
1	105873529	290457491	Teat number QTL (5255)	1	115698959	115734281	MSTRG.1813.1
1	105873529	290457491	Teat number QTL (5255)	1	138258064	138262930	MSTRG.2297.1
1	105873529	290457491	Teat number QTL (5255)	1	179788962	179799724	MSTRG.2773.1
1	105873529	290457491	Teat number QTL (5255)	1	179796932	179799853	MSTRG.2773.2
1	105873529	290457491	Teat number QTL (5255)	1	213147552	213195062	MSTRG.3379.1
1	105873529	290457491	Teat number QTL (5255)	1	247060447	247069977	MSTRG.3931.1
1	105873529	290457491	Teat number QTL (5255)	1	247062253	247065719	MSTRG.3931.2
1	105873529	290457491	Teat number QTL (5255)	1	264223330	264237373	MSTRG.4184.1
1	105873529	290457491	Teat number QTL (5255)	1	264223330	264237373	MSTRG.4184.2
1	105873529	290457491	Teat number QTL (5255)	1	267187495	267188526	MSTRG.4258.2
1	105873529	290457491	Teat number QTL (5255)	1	267187495	267206909	MSTRG.4258.1
1	105873529	290457491	Teat number QTL (5255)	1	229871932	229955811	MSTRG.3631.1
1	105873529	290457491	Teat number QTL (5255)	1	106933151	106963961	MSTRG.1497.1
1	106187796	309614845	Drip loss QTL (7936)	1	107150104	107154187	MSTRG.1509.1
1	106187796	309614845	Drip loss QTL (7936)	1	107150105	107154546	MSTRG.1509.2
1	106187796	309614845	Drip loss QTL (7936)	1	109184403	109189089	MSTRG.1558.1
1	106187796	309614845	Drip loss QTL (7936)	1	109185924	109189089	MSTRG.1558.2
1	106187796	309614845	Drip loss QTL (7936)	1	115698959	115734281	MSTRG.1813.1
1	106187796	309614845	Drip loss QTL (7936)	1	138258064	138262930	MSTRG.2297.1
1	106187796	309614845	Drip loss QTL (7936)	1	179788962	179799724	MSTRG.2773.1
1	106187796	309614845	Drip loss QTL (7936)	1	179796932	179799853	MSTRG.2773.2
1	106187796	309614845	Drip loss QTL (7936)	1	213147552	213195062	MSTRG.3379.1
1	106187796	309614845	Drip loss QTL (7936)	1	247060447	247069977	MSTRG.3931.1
1	106187796	309614845	Drip loss QTL (7936)	1	247062253	247065719	MSTRG.3931.2
1	106187796	309614845	Drip loss QTL (7936)	1	264223330	264237373	MSTRG.4184.1
1	106187796	309614845	Drip loss QTL (7936)	1	264223330	264237373	MSTRG.4184.2
1	106187796	309614845	Drip loss QTL (7936)	1	267187495	267188526	MSTRG.4258.2
1	106187796	309614845	Drip loss QTL (7936)	1	267187495	267206909	MSTRG.4258.1
1	106187796	309614845	Drip loss QTL (7936)	1	229871932	229955811	MSTRG.3631.1
1	106187796	309614845	Drip loss QTL (7936)	1	106933151	106963961	MSTRG.1497.1
1	106187796	309614845	Drip loss QTL (8063)	1	107150104	107154187	MSTRG.1509.1
1	106187796	309614845	Drip loss QTL (8063)	1	107150105	107154546	MSTRG.1509.2
1	106187796	309614845	Drip loss QTL (8063)	1	109184403	109189089	MSTRG.1558.1
1	106187796	309614845	Drip loss QTL (8063)	1	109185924	109189089	MSTRG.1558.2
1	106187796	309614845	Drip loss QTL (8063)	1	115698959	115734281	MSTRG.1813.1
1	106187796	309614845	Drip loss QTL (8063)	1	138258064	138262930	MSTRG.2297.1
1	106187796	309614845	Drip loss QTL (8063)	1	179788962	179799724	MSTRG.2773.1
1	106187796	309614845	Drip loss QTL (8063)	1	179796932	179799853	MSTRG.2773.2
1	106187796	309614845	Drip loss QTL (8063)	1	213147552	213195062	MSTRG.3379.1
1	106187796	309614845	Drip loss QTL (8063)	1	247060447	247069977	MSTRG.3931.1
1	106187796	309614845	Drip loss QTL (8063)	1	247062253	247065719	MSTRG.3931.2
1	106187796	309614845	Drip loss QTL (8063)	1	264223330	264237373	MSTRG.4184.1
1	106187796	309614845	Drip loss QTL (8063)	1	264223330	264237373	MSTRG.4184.2
1	106187796	309614845	Drip loss QTL (8063)	1	267187495	267188526	MSTRG.4258.2
1	106187796	309614845	Drip loss QTL (8063)	1	267187495	267206909	MSTRG.4258.1
1	106187796	309614845	Drip loss QTL (8063)	1	229871932	229955811	MSTRG.3631.1
1	106187796	309614845	Drip loss QTL (8063)	1	106933151	106963961	MSTRG.1497.1
1	106187796	309614845	Drip loss QTL (8131)	1	107150104	107154187	MSTRG.1509.1
1	106187796	309614845	Drip loss QTL (8131)	1	107150105	107154546	MSTRG.1509.2
1	106187796	309614845	Drip loss QTL (8131)	1	109184403	109189089	MSTRG.1558.1
1	106187796	309614845	Drip loss QTL (8131)	1	109185924	109189089	MSTRG.1558.2
1	106187796	309614845	Drip loss QTL (8131)	1	115698959	115734281	MSTRG.1813.1
1	106187796	309614845	Drip loss QTL (8131)	1	138258064	138262930	MSTRG.2297.1
1	106187796	309614845	Drip loss QTL (8131)	1	179788962	179799724	MSTRG.2773.1
1	106187796	309614845	Drip loss QTL (8131)	1	179796932	179799853	MSTRG.2773.2
1	106187796	309614845	Drip loss QTL (8131)	1	213147552	213195062	MSTRG.3379.1
1	106187796	309614845	Drip loss QTL (8131)	1	247060447	247069977	MSTRG.3931.1
1	106187796	309614845	Drip loss QTL (8131)	1	247062253	247065719	MSTRG.3931.2
1	106187796	309614845	Drip loss QTL (8131)	1	264223330	264237373	MSTRG.4184.1
1	106187796	309614845	Drip loss QTL (8131)	1	264223330	264237373	MSTRG.4184.2
1	106187796	309614845	Drip loss QTL (8131)	1	267187495	267188526	MSTRG.4258.2
1	106187796	309614845	Drip loss QTL (8131)	1	267187495	267206909	MSTRG.4258.1
1	106187796	309614845	Drip loss QTL (8131)	1	229871932	229955811	MSTRG.3631.1
1	106187796	309614845	Drip loss QTL (8131)	1	106933151	106963961	MSTRG.1497.1
1	106187796	309614845	Drip loss QTL (8300)	1	107150104	107154187	MSTRG.1509.1
1	106187796	309614845	Drip loss QTL (8300)	1	107150105	107154546	MSTRG.1509.2
1	106187796	309614845	Drip loss QTL (8300)	1	109184403	109189089	MSTRG.1558.1
1	106187796	309614845	Drip loss QTL (8300)	1	109185924	109189089	MSTRG.1558.2
1	106187796	309614845	Drip loss QTL (8300)	1	115698959	115734281	MSTRG.1813.1
1	106187796	309614845	Drip loss QTL (8300)	1	138258064	138262930	MSTRG.2297.1
1	106187796	309614845	Drip loss QTL (8300)	1	179788962	179799724	MSTRG.2773.1
1	106187796	309614845	Drip loss QTL (8300)	1	179796932	179799853	MSTRG.2773.2
1	106187796	309614845	Drip loss QTL (8300)	1	213147552	213195062	MSTRG.3379.1
1	106187796	309614845	Drip loss QTL (8300)	1	247060447	247069977	MSTRG.3931.1
1	106187796	309614845	Drip loss QTL (8300)	1	247062253	247065719	MSTRG.3931.2
1	106187796	309614845	Drip loss QTL (8300)	1	264223330	264237373	MSTRG.4184.1
1	106187796	309614845	Drip loss QTL (8300)	1	264223330	264237373	MSTRG.4184.2
1	106187796	309614845	Drip loss QTL (8300)	1	267187495	267188526	MSTRG.4258.2
1	106187796	309614845	Drip loss QTL (8300)	1	267187495	267206909	MSTRG.4258.1
1	106187796	309614845	Drip loss QTL (8300)	1	229871932	229955811	MSTRG.3631.1
1	106187796	309614845	Drip loss QTL (8300)	1	106933151	106963961	MSTRG.1497.1
1	106187796	309614845	Drip loss QTL (8323)	1	107150104	107154187	MSTRG.1509.1
1	106187796	309614845	Drip loss QTL (8323)	1	107150105	107154546	MSTRG.1509.2
1	106187796	309614845	Drip loss QTL (8323)	1	109184403	109189089	MSTRG.1558.1
1	106187796	309614845	Drip loss QTL (8323)	1	109185924	109189089	MSTRG.1558.2
1	106187796	309614845	Drip loss QTL (8323)	1	115698959	115734281	MSTRG.1813.1
1	106187796	309614845	Drip loss QTL (8323)	1	138258064	138262930	MSTRG.2297.1
1	106187796	309614845	Drip loss QTL (8323)	1	179788962	179799724	MSTRG.2773.1
1	106187796	309614845	Drip loss QTL (8323)	1	179796932	179799853	MSTRG.2773.2
1	106187796	309614845	Drip loss QTL (8323)	1	213147552	213195062	MSTRG.3379.1
1	106187796	309614845	Drip loss QTL (8323)	1	247060447	247069977	MSTRG.3931.1
1	106187796	309614845	Drip loss QTL (8323)	1	247062253	247065719	MSTRG.3931.2
1	106187796	309614845	Drip loss QTL (8323)	1	264223330	264237373	MSTRG.4184.1
1	106187796	309614845	Drip loss QTL (8323)	1	264223330	264237373	MSTRG.4184.2
1	106187796	309614845	Drip loss QTL (8323)	1	267187495	267188526	MSTRG.4258.2
1	106187796	309614845	Drip loss QTL (8323)	1	267187495	267206909	MSTRG.4258.1
1	106187796	309614845	Drip loss QTL (8323)	1	229871932	229955811	MSTRG.3631.1
1	106187796	309614845	Drip loss QTL (8323)	1	106933151	106963961	MSTRG.1497.1
1	106187796	309614845	Drip loss QTL (8382)	1	107150104	107154187	MSTRG.1509.1
1	106187796	309614845	Drip loss QTL (8382)	1	107150105	107154546	MSTRG.1509.2
1	106187796	309614845	Drip loss QTL (8382)	1	109184403	109189089	MSTRG.1558.1
1	106187796	309614845	Drip loss QTL (8382)	1	109185924	109189089	MSTRG.1558.2
1	106187796	309614845	Drip loss QTL (8382)	1	115698959	115734281	MSTRG.1813.1
1	106187796	309614845	Drip loss QTL (8382)	1	138258064	138262930	MSTRG.2297.1
1	106187796	309614845	Drip loss QTL (8382)	1	179788962	179799724	MSTRG.2773.1
1	106187796	309614845	Drip loss QTL (8382)	1	179796932	179799853	MSTRG.2773.2
1	106187796	309614845	Drip loss QTL (8382)	1	213147552	213195062	MSTRG.3379.1
1	106187796	309614845	Drip loss QTL (8382)	1	247060447	247069977	MSTRG.3931.1
1	106187796	309614845	Drip loss QTL (8382)	1	247062253	247065719	MSTRG.3931.2
1	106187796	309614845	Drip loss QTL (8382)	1	264223330	264237373	MSTRG.4184.1
1	106187796	309614845	Drip loss QTL (8382)	1	264223330	264237373	MSTRG.4184.2
1	106187796	309614845	Drip loss QTL (8382)	1	267187495	267188526	MSTRG.4258.2
1	106187796	309614845	Drip loss QTL (8382)	1	267187495	267206909	MSTRG.4258.1
1	106187796	309614845	Drip loss QTL (8382)	1	229871932	229955811	MSTRG.3631.1
1	106187796	309614845	Drip loss QTL (8382)	1	106933151	106963961	MSTRG.1497.1
1	106187796	309614845	Drip loss QTL (8480)	1	107150104	107154187	MSTRG.1509.1
1	106187796	309614845	Drip loss QTL (8480)	1	107150105	107154546	MSTRG.1509.2
1	106187796	309614845	Drip loss QTL (8480)	1	109184403	109189089	MSTRG.1558.1
1	106187796	309614845	Drip loss QTL (8480)	1	109185924	109189089	MSTRG.1558.2
1	106187796	309614845	Drip loss QTL (8480)	1	115698959	115734281	MSTRG.1813.1
1	106187796	309614845	Drip loss QTL (8480)	1	138258064	138262930	MSTRG.2297.1
1	106187796	309614845	Drip loss QTL (8480)	1	179788962	179799724	MSTRG.2773.1
1	106187796	309614845	Drip loss QTL (8480)	1	179796932	179799853	MSTRG.2773.2
1	106187796	309614845	Drip loss QTL (8480)	1	213147552	213195062	MSTRG.3379.1
1	106187796	309614845	Drip loss QTL (8480)	1	247060447	247069977	MSTRG.3931.1
1	106187796	309614845	Drip loss QTL (8480)	1	247062253	247065719	MSTRG.3931.2
1	106187796	309614845	Drip loss QTL (8480)	1	264223330	264237373	MSTRG.4184.1
1	106187796	309614845	Drip loss QTL (8480)	1	264223330	264237373	MSTRG.4184.2
1	106187796	309614845	Drip loss QTL (8480)	1	267187495	267188526	MSTRG.4258.2
1	106187796	309614845	Drip loss QTL (8480)	1	267187495	267206909	MSTRG.4258.1
1	106187796	309614845	Drip loss QTL (8480)	1	229871932	229955811	MSTRG.3631.1
1	106187796	309614845	Drip loss QTL (8480)	1	106933151	106963961	MSTRG.1497.1
1	106187796	309614845	Drip loss QTL (8564)	1	107150104	107154187	MSTRG.1509.1
1	106187796	309614845	Drip loss QTL (8564)	1	107150105	107154546	MSTRG.1509.2
1	106187796	309614845	Drip loss QTL (8564)	1	109184403	109189089	MSTRG.1558.1
1	106187796	309614845	Drip loss QTL (8564)	1	109185924	109189089	MSTRG.1558.2
1	106187796	309614845	Drip loss QTL (8564)	1	115698959	115734281	MSTRG.1813.1
1	106187796	309614845	Drip loss QTL (8564)	1	138258064	138262930	MSTRG.2297.1
1	106187796	309614845	Drip loss QTL (8564)	1	179788962	179799724	MSTRG.2773.1
1	106187796	309614845	Drip loss QTL (8564)	1	179796932	179799853	MSTRG.2773.2
1	106187796	309614845	Drip loss QTL (8564)	1	213147552	213195062	MSTRG.3379.1
1	106187796	309614845	Drip loss QTL (8564)	1	247060447	247069977	MSTRG.3931.1
1	106187796	309614845	Drip loss QTL (8564)	1	247062253	247065719	MSTRG.3931.2
1	106187796	309614845	Drip loss QTL (8564)	1	264223330	264237373	MSTRG.4184.1
1	106187796	309614845	Drip loss QTL (8564)	1	264223330	264237373	MSTRG.4184.2
1	106187796	309614845	Drip loss QTL (8564)	1	267187495	267188526	MSTRG.4258.2
1	106187796	309614845	Drip loss QTL (8564)	1	267187495	267206909	MSTRG.4258.1
1	106187796	309614845	Drip loss QTL (8564)	1	229871932	229955811	MSTRG.3631.1
1	106187796	309614845	Drip loss QTL (8564)	1	106933151	106963961	MSTRG.1497.1
1	106187796	309614845	Drip loss QTL (8602)	1	107150104	107154187	MSTRG.1509.1
1	106187796	309614845	Drip loss QTL (8602)	1	107150105	107154546	MSTRG.1509.2
1	106187796	309614845	Drip loss QTL (8602)	1	109184403	109189089	MSTRG.1558.1
1	106187796	309614845	Drip loss QTL (8602)	1	109185924	109189089	MSTRG.1558.2
1	106187796	309614845	Drip loss QTL (8602)	1	115698959	115734281	MSTRG.1813.1
1	106187796	309614845	Drip loss QTL (8602)	1	138258064	138262930	MSTRG.2297.1
1	106187796	309614845	Drip loss QTL (8602)	1	179788962	179799724	MSTRG.2773.1
1	106187796	309614845	Drip loss QTL (8602)	1	179796932	179799853	MSTRG.2773.2
1	106187796	309614845	Drip loss QTL (8602)	1	213147552	213195062	MSTRG.3379.1
1	106187796	309614845	Drip loss QTL (8602)	1	247060447	247069977	MSTRG.3931.1
1	106187796	309614845	Drip loss QTL (8602)	1	247062253	247065719	MSTRG.3931.2
1	106187796	309614845	Drip loss QTL (8602)	1	264223330	264237373	MSTRG.4184.1
1	106187796	309614845	Drip loss QTL (8602)	1	264223330	264237373	MSTRG.4184.2
1	106187796	309614845	Drip loss QTL (8602)	1	267187495	267188526	MSTRG.4258.2
1	106187796	309614845	Drip loss QTL (8602)	1	267187495	267206909	MSTRG.4258.1
1	106187796	309614845	Drip loss QTL (8602)	1	229871932	229955811	MSTRG.3631.1
1	106187796	309614845	Drip loss QTL (8602)	1	106933151	106963961	MSTRG.1497.1
1	106747450	133275468	Backfat at last lumbar QTL (17787)	1	107150104	107154187	MSTRG.1509.1
1	106747450	133275468	Backfat at last lumbar QTL (17787)	1	107150105	107154546	MSTRG.1509.2
1	106747450	133275468	Backfat at last lumbar QTL (17787)	1	109184403	109189089	MSTRG.1558.1
1	106747450	133275468	Backfat at last lumbar QTL (17787)	1	109185924	109189089	MSTRG.1558.2
1	106747450	133275468	Backfat at last lumbar QTL (17787)	1	115698959	115734281	MSTRG.1813.1
1	106747450	133275468	Backfat at last lumbar QTL (17787)	1	106933151	106963961	MSTRG.1497.1
1	106747450	133275468	Shear force QTL (17788)	1	107150104	107154187	MSTRG.1509.1
1	106747450	133275468	Shear force QTL (17788)	1	107150105	107154546	MSTRG.1509.2
1	106747450	133275468	Shear force QTL (17788)	1	109184403	109189089	MSTRG.1558.1
1	106747450	133275468	Shear force QTL (17788)	1	109185924	109189089	MSTRG.1558.2
1	106747450	133275468	Shear force QTL (17788)	1	115698959	115734281	MSTRG.1813.1
1	106747450	133275468	Shear force QTL (17788)	1	106933151	106963961	MSTRG.1497.1
1	106747450	233806417	Ear erectness QTL (5646)	1	107150104	107154187	MSTRG.1509.1
1	106747450	233806417	Ear erectness QTL (5646)	1	107150105	107154546	MSTRG.1509.2
1	106747450	233806417	Ear erectness QTL (5646)	1	109184403	109189089	MSTRG.1558.1
1	106747450	233806417	Ear erectness QTL (5646)	1	109185924	109189089	MSTRG.1558.2
1	106747450	233806417	Ear erectness QTL (5646)	1	115698959	115734281	MSTRG.1813.1
1	106747450	233806417	Ear erectness QTL (5646)	1	138258064	138262930	MSTRG.2297.1
1	106747450	233806417	Ear erectness QTL (5646)	1	179788962	179799724	MSTRG.2773.1
1	106747450	233806417	Ear erectness QTL (5646)	1	179796932	179799853	MSTRG.2773.2
1	106747450	233806417	Ear erectness QTL (5646)	1	213147552	213195062	MSTRG.3379.1
1	106747450	233806417	Ear erectness QTL (5646)	1	229871932	229955811	MSTRG.3631.1
1	106747450	233806417	Ear erectness QTL (5646)	1	106933151	106963961	MSTRG.1497.1
1	106747450	233806417	Ear erectness QTL (5651)	1	107150104	107154187	MSTRG.1509.1
1	106747450	233806417	Ear erectness QTL (5651)	1	107150105	107154546	MSTRG.1509.2
1	106747450	233806417	Ear erectness QTL (5651)	1	109184403	109189089	MSTRG.1558.1
1	106747450	233806417	Ear erectness QTL (5651)	1	109185924	109189089	MSTRG.1558.2
1	106747450	233806417	Ear erectness QTL (5651)	1	115698959	115734281	MSTRG.1813.1
1	106747450	233806417	Ear erectness QTL (5651)	1	138258064	138262930	MSTRG.2297.1
1	106747450	233806417	Ear erectness QTL (5651)	1	179788962	179799724	MSTRG.2773.1
1	106747450	233806417	Ear erectness QTL (5651)	1	179796932	179799853	MSTRG.2773.2
1	106747450	233806417	Ear erectness QTL (5651)	1	213147552	213195062	MSTRG.3379.1
1	106747450	233806417	Ear erectness QTL (5651)	1	229871932	229955811	MSTRG.3631.1
1	106747450	233806417	Ear erectness QTL (5651)	1	106933151	106963961	MSTRG.1497.1
1	106747450	233806417	Ear size QTL (5640)	1	107150104	107154187	MSTRG.1509.1
1	106747450	233806417	Ear size QTL (5640)	1	107150105	107154546	MSTRG.1509.2
1	106747450	233806417	Ear size QTL (5640)	1	109184403	109189089	MSTRG.1558.1
1	106747450	233806417	Ear size QTL (5640)	1	109185924	109189089	MSTRG.1558.2
1	106747450	233806417	Ear size QTL (5640)	1	115698959	115734281	MSTRG.1813.1
1	106747450	233806417	Ear size QTL (5640)	1	138258064	138262930	MSTRG.2297.1
1	106747450	233806417	Ear size QTL (5640)	1	179788962	179799724	MSTRG.2773.1
1	106747450	233806417	Ear size QTL (5640)	1	179796932	179799853	MSTRG.2773.2
1	106747450	233806417	Ear size QTL (5640)	1	213147552	213195062	MSTRG.3379.1
1	106747450	233806417	Ear size QTL (5640)	1	229871932	229955811	MSTRG.3631.1
1	106747450	233806417	Ear size QTL (5640)	1	106933151	106963961	MSTRG.1497.1
1	107871792	109893944	Body weight QTL (65008)	1	109184403	109189089	MSTRG.1558.1
1	107871792	109893944	Body weight QTL (65008)	1	109185924	109189089	MSTRG.1558.2
1	108714563	220801047	Backfat weight QTL (3171)	1	109184403	109189089	MSTRG.1558.1
1	108714563	220801047	Backfat weight QTL (3171)	1	109185924	109189089	MSTRG.1558.2
1	108714563	220801047	Backfat weight QTL (3171)	1	115698959	115734281	MSTRG.1813.1
1	108714563	220801047	Backfat weight QTL (3171)	1	138258064	138262930	MSTRG.2297.1
1	108714563	220801047	Backfat weight QTL (3171)	1	179788962	179799724	MSTRG.2773.1
1	108714563	220801047	Backfat weight QTL (3171)	1	179796932	179799853	MSTRG.2773.2
1	108714563	220801047	Backfat weight QTL (3171)	1	213147552	213195062	MSTRG.3379.1
1	108714563	293277782	Body weight (weaning) QTL (5230)	1	109184403	109189089	MSTRG.1558.1
1	108714563	293277782	Body weight (weaning) QTL (5230)	1	109185924	109189089	MSTRG.1558.2
1	108714563	293277782	Body weight (weaning) QTL (5230)	1	115698959	115734281	MSTRG.1813.1
1	108714563	293277782	Body weight (weaning) QTL (5230)	1	138258064	138262930	MSTRG.2297.1
1	108714563	293277782	Body weight (weaning) QTL (5230)	1	179788962	179799724	MSTRG.2773.1
1	108714563	293277782	Body weight (weaning) QTL (5230)	1	179796932	179799853	MSTRG.2773.2
1	108714563	293277782	Body weight (weaning) QTL (5230)	1	213147552	213195062	MSTRG.3379.1
1	108714563	293277782	Body weight (weaning) QTL (5230)	1	247060447	247069977	MSTRG.3931.1
1	108714563	293277782	Body weight (weaning) QTL (5230)	1	247062253	247065719	MSTRG.3931.2
1	108714563	293277782	Body weight (weaning) QTL (5230)	1	264223330	264237373	MSTRG.4184.1
1	108714563	293277782	Body weight (weaning) QTL (5230)	1	264223330	264237373	MSTRG.4184.2
1	108714563	293277782	Body weight (weaning) QTL (5230)	1	267187495	267188526	MSTRG.4258.2
1	108714563	293277782	Body weight (weaning) QTL (5230)	1	267187495	267206909	MSTRG.4258.1
1	108714563	293277782	Body weight (weaning) QTL (5230)	1	229871932	229955811	MSTRG.3631.1
1	109014259	109245786	Litter size QTL (18219)	1	109184403	109189089	MSTRG.1558.1
1	109014259	109245786	Litter size QTL (18219)	1	109185924	109189089	MSTRG.1558.2
1	109147846	109707434	Drip loss QTL (8002)	1	109184403	109189089	MSTRG.1558.1
1	109147846	109707434	Drip loss QTL (8002)	1	109185924	109189089	MSTRG.1558.2
1	109147846	109707434	Drip loss QTL (8122)	1	109184403	109189089	MSTRG.1558.1
1	109147846	109707434	Drip loss QTL (8122)	1	109185924	109189089	MSTRG.1558.2
1	109147846	109707434	Drip loss QTL (8304)	1	109184403	109189089	MSTRG.1558.1
1	109147846	109707434	Drip loss QTL (8304)	1	109185924	109189089	MSTRG.1558.2
1	109147846	109707434	Drip loss QTL (8383)	1	109184403	109189089	MSTRG.1558.1
1	109147846	109707434	Drip loss QTL (8383)	1	109185924	109189089	MSTRG.1558.2
1	109147846	109707434	Drip loss QTL (8557)	1	109184403	109189089	MSTRG.1558.1
1	109147846	109707434	Drip loss QTL (8557)	1	109185924	109189089	MSTRG.1558.2
1	109147846	109707434	Drip loss QTL (7944)	1	109184403	109189089	MSTRG.1558.1
1	109147846	109707434	Drip loss QTL (7944)	1	109185924	109189089	MSTRG.1558.2
1	133275468	154329026	Marbling QTL (78)	1	138258064	138262930	MSTRG.2297.1
1	133275468	242497921	Platelet distribution width QTL (12312)	1	138258064	138262930	MSTRG.2297.1
1	133275468	242497921	Platelet distribution width QTL (12312)	1	179788962	179799724	MSTRG.2773.1
1	133275468	242497921	Platelet distribution width QTL (12312)	1	179796932	179799853	MSTRG.2773.2
1	133275468	242497921	Platelet distribution width QTL (12312)	1	213147552	213195062	MSTRG.3379.1
1	133275468	242497921	Platelet distribution width QTL (12312)	1	229871932	229955811	MSTRG.3631.1
1	133275468	220801047	Backfat at last lumbar QTL (45)	1	138258064	138262930	MSTRG.2297.1
1	133275468	220801047	Backfat at last lumbar QTL (45)	1	179788962	179799724	MSTRG.2773.1
1	133275468	220801047	Backfat at last lumbar QTL (45)	1	179796932	179799853	MSTRG.2773.2
1	133275468	220801047	Backfat at last lumbar QTL (45)	1	213147552	213195062	MSTRG.3379.1
1	134741085	142302138	Cross-sectional area of type IIa muscle fibers QTL (10236)	1	138258064	138262930	MSTRG.2297.1
1	137226009	141252903	Linoleic acid content QTL (32103)	1	138258064	138262930	MSTRG.2297.1
1	137907455	154329026	Hemoglobin QTL (7215)	1	138258064	138262930	MSTRG.2297.1
1	140728674	229018949	Marbling QTL (4020)	1	179788962	179799724	MSTRG.2773.1
1	140728674	229018949	Marbling QTL (4020)	1	179796932	179799853	MSTRG.2773.2
1	140728674	229018949	Marbling QTL (4020)	1	213147552	213195062	MSTRG.3379.1
1	150567892	184999941	Muscle fat content QTL (4017)	1	179788962	179799724	MSTRG.2773.1
1	150567892	184999941	Muscle fat content QTL (4017)	1	179796932	179799853	MSTRG.2773.2
1	154143188	180898441	Average backfat thickness QTL (797)	1	179788962	179799724	MSTRG.2773.1
1	154143188	180898441	Average backfat thickness QTL (797)	1	179796932	179799853	MSTRG.2773.2
1	154329026	210644363	Side fat thickness QTL (5958)	1	179788962	179799724	MSTRG.2773.1
1	154329026	210644363	Side fat thickness QTL (5958)	1	179796932	179799853	MSTRG.2773.2
1	162073157	233806417	Backfat at tenth rib QTL (138)	1	179788962	179799724	MSTRG.2773.1
1	162073157	233806417	Backfat at tenth rib QTL (138)	1	179796932	179799853	MSTRG.2773.2
1	162073157	233806417	Backfat at tenth rib QTL (138)	1	213147552	213195062	MSTRG.3379.1
1	162073157	233806417	Backfat at tenth rib QTL (138)	1	229871932	229955811	MSTRG.3631.1
1	162073157	233806417	Average daily gain QTL (139)	1	179788962	179799724	MSTRG.2773.1
1	162073157	233806417	Average daily gain QTL (139)	1	179796932	179799853	MSTRG.2773.2
1	162073157	233806417	Average daily gain QTL (139)	1	213147552	213195062	MSTRG.3379.1
1	162073157	233806417	Average daily gain QTL (139)	1	229871932	229955811	MSTRG.3631.1
1	162073157	233806417	Average daily gain QTL (140)	1	179788962	179799724	MSTRG.2773.1
1	162073157	233806417	Average daily gain QTL (140)	1	179796932	179799853	MSTRG.2773.2
1	162073157	233806417	Average daily gain QTL (140)	1	213147552	213195062	MSTRG.3379.1
1	162073157	233806417	Average daily gain QTL (140)	1	229871932	229955811	MSTRG.3631.1
1	162073157	233806417	Daily feed intake QTL (141)	1	179788962	179799724	MSTRG.2773.1
1	162073157	233806417	Daily feed intake QTL (141)	1	179796932	179799853	MSTRG.2773.2
1	162073157	233806417	Daily feed intake QTL (141)	1	213147552	213195062	MSTRG.3379.1
1	162073157	233806417	Daily feed intake QTL (141)	1	229871932	229955811	MSTRG.3631.1
1	162073157	257944209	Ear erectness QTL (8898)	1	179788962	179799724	MSTRG.2773.1
1	162073157	257944209	Ear erectness QTL (8898)	1	179796932	179799853	MSTRG.2773.2
1	162073157	257944209	Ear erectness QTL (8898)	1	213147552	213195062	MSTRG.3379.1
1	162073157	257944209	Ear erectness QTL (8898)	1	247060447	247069977	MSTRG.3931.1
1	162073157	257944209	Ear erectness QTL (8898)	1	247062253	247065719	MSTRG.3931.2
1	162073157	257944209	Ear erectness QTL (8898)	1	229871932	229955811	MSTRG.3631.1
1	162073157	233806417	Salmonella count in spleen QTL (11557)	1	179788962	179799724	MSTRG.2773.1
1	162073157	233806417	Salmonella count in spleen QTL (11557)	1	179796932	179799853	MSTRG.2773.2
1	162073157	233806417	Salmonella count in spleen QTL (11557)	1	213147552	213195062	MSTRG.3379.1
1	162073157	233806417	Salmonella count in spleen QTL (11557)	1	229871932	229955811	MSTRG.3631.1
1	162275821	311704372	Umbilical hernia QTL (8742)	1	179788962	179799724	MSTRG.2773.1
1	162275821	311704372	Umbilical hernia QTL (8742)	1	179796932	179799853	MSTRG.2773.2
1	162275821	311704372	Umbilical hernia QTL (8742)	1	213147552	213195062	MSTRG.3379.1
1	162275821	311704372	Umbilical hernia QTL (8742)	1	247060447	247069977	MSTRG.3931.1
1	162275821	311704372	Umbilical hernia QTL (8742)	1	247062253	247065719	MSTRG.3931.2
1	162275821	311704372	Umbilical hernia QTL (8742)	1	264223330	264237373	MSTRG.4184.1
1	162275821	311704372	Umbilical hernia QTL (8742)	1	264223330	264237373	MSTRG.4184.2
1	162275821	311704372	Umbilical hernia QTL (8742)	1	267187495	267188526	MSTRG.4258.2
1	162275821	311704372	Umbilical hernia QTL (8742)	1	267187495	267206909	MSTRG.4258.1
1	162275821	311704372	Umbilical hernia QTL (8742)	1	229871932	229955811	MSTRG.3631.1
1	162857849	233723456	Drip loss QTL (7784)	1	179788962	179799724	MSTRG.2773.1
1	162857849	233723456	Drip loss QTL (7784)	1	179796932	179799853	MSTRG.2773.2
1	162857849	233723456	Drip loss QTL (7784)	1	213147552	213195062	MSTRG.3379.1
1	162857849	233723456	Drip loss QTL (7784)	1	229871932	229955811	MSTRG.3631.1
1	162857849	233723456	Drip loss QTL (7861)	1	179788962	179799724	MSTRG.2773.1
1	162857849	233723456	Drip loss QTL (7861)	1	179796932	179799853	MSTRG.2773.2
1	162857849	233723456	Drip loss QTL (7861)	1	213147552	213195062	MSTRG.3379.1
1	162857849	233723456	Drip loss QTL (7861)	1	229871932	229955811	MSTRG.3631.1
1	162857849	233723456	Drip loss QTL (8102)	1	179788962	179799724	MSTRG.2773.1
1	162857849	233723456	Drip loss QTL (8102)	1	179796932	179799853	MSTRG.2773.2
1	162857849	233723456	Drip loss QTL (8102)	1	213147552	213195062	MSTRG.3379.1
1	162857849	233723456	Drip loss QTL (8102)	1	229871932	229955811	MSTRG.3631.1
1	162857849	233723456	Drip loss QTL (8156)	1	179788962	179799724	MSTRG.2773.1
1	162857849	233723456	Drip loss QTL (8156)	1	179796932	179799853	MSTRG.2773.2
1	162857849	233723456	Drip loss QTL (8156)	1	213147552	213195062	MSTRG.3379.1
1	162857849	233723456	Drip loss QTL (8156)	1	229871932	229955811	MSTRG.3631.1
1	162857849	233723456	Drip loss QTL (8348)	1	179788962	179799724	MSTRG.2773.1
1	162857849	233723456	Drip loss QTL (8348)	1	179796932	179799853	MSTRG.2773.2
1	162857849	233723456	Drip loss QTL (8348)	1	213147552	213195062	MSTRG.3379.1
1	162857849	233723456	Drip loss QTL (8348)	1	229871932	229955811	MSTRG.3631.1
1	163919363	234502051	Head weight QTL (432)	1	179788962	179799724	MSTRG.2773.1
1	163919363	234502051	Head weight QTL (432)	1	179796932	179799853	MSTRG.2773.2
1	163919363	234502051	Head weight QTL (432)	1	213147552	213195062	MSTRG.3379.1
1	163919363	234502051	Head weight QTL (432)	1	229871932	229955811	MSTRG.3631.1
1	165580236	257944209	Nonfunctional nipples QTL (7453)	1	179788962	179799724	MSTRG.2773.1
1	165580236	257944209	Nonfunctional nipples QTL (7453)	1	179796932	179799853	MSTRG.2773.2
1	165580236	257944209	Nonfunctional nipples QTL (7453)	1	213147552	213195062	MSTRG.3379.1
1	165580236	257944209	Nonfunctional nipples QTL (7453)	1	247060447	247069977	MSTRG.3931.1
1	165580236	257944209	Nonfunctional nipples QTL (7453)	1	247062253	247065719	MSTRG.3931.2
1	165580236	257944209	Nonfunctional nipples QTL (7453)	1	229871932	229955811	MSTRG.3631.1
1	167392293	226764071	Liver weight QTL (13264)	1	179788962	179799724	MSTRG.2773.1
1	167392293	226764071	Liver weight QTL (13264)	1	179796932	179799853	MSTRG.2773.2
1	167392293	226764071	Liver weight QTL (13264)	1	213147552	213195062	MSTRG.3379.1
1	168669767	210644363	Ham fat weight QTL (1271)	1	179788962	179799724	MSTRG.2773.1
1	168669767	210644363	Ham fat weight QTL (1271)	1	179796932	179799853	MSTRG.2773.2
1	169149638	233806417	Fat to meat ratio QTL (12742)	1	179788962	179799724	MSTRG.2773.1
1	169149638	233806417	Fat to meat ratio QTL (12742)	1	179796932	179799853	MSTRG.2773.2
1	169149638	233806417	Fat to meat ratio QTL (12742)	1	213147552	213195062	MSTRG.3379.1
1	169149638	233806417	Fat to meat ratio QTL (12742)	1	229871932	229955811	MSTRG.3631.1
1	169149638	233806417	Abdominal fat weight QTL (12714)	1	179788962	179799724	MSTRG.2773.1
1	169149638	233806417	Abdominal fat weight QTL (12714)	1	179796932	179799853	MSTRG.2773.2
1	169149638	233806417	Abdominal fat weight QTL (12714)	1	213147552	213195062	MSTRG.3379.1
1	169149638	233806417	Abdominal fat weight QTL (12714)	1	229871932	229955811	MSTRG.3631.1
1	169149638	233806417	backfat above muscle dorsi QTL (12731)	1	179788962	179799724	MSTRG.2773.1
1	169149638	233806417	backfat above muscle dorsi QTL (12731)	1	179796932	179799853	MSTRG.2773.2
1	169149638	233806417	backfat above muscle dorsi QTL (12731)	1	213147552	213195062	MSTRG.3379.1
1	169149638	233806417	backfat above muscle dorsi QTL (12731)	1	229871932	229955811	MSTRG.3631.1
1	169149638	233806417	Shoulder external fat weight QTL (12722)	1	179788962	179799724	MSTRG.2773.1
1	169149638	233806417	Shoulder external fat weight QTL (12722)	1	179796932	179799853	MSTRG.2773.2
1	169149638	233806417	Shoulder external fat weight QTL (12722)	1	213147552	213195062	MSTRG.3379.1
1	169149638	233806417	Shoulder external fat weight QTL (12722)	1	229871932	229955811	MSTRG.3631.1
1	169149638	233806417	Subcutanous fat area QTL (12736)	1	179788962	179799724	MSTRG.2773.1
1	169149638	233806417	Subcutanous fat area QTL (12736)	1	179796932	179799853	MSTRG.2773.2
1	169149638	233806417	Subcutanous fat area QTL (12736)	1	213147552	213195062	MSTRG.3379.1
1	169149638	233806417	Subcutanous fat area QTL (12736)	1	229871932	229955811	MSTRG.3631.1
1	169149638	226764071	Adipocyte diameter QTL (18028)	1	179788962	179799724	MSTRG.2773.1
1	169149638	226764071	Adipocyte diameter QTL (18028)	1	179796932	179799853	MSTRG.2773.2
1	169149638	226764071	Adipocyte diameter QTL (18028)	1	213147552	213195062	MSTRG.3379.1
1	169149638	233806417	Backfat weight QTL (12724)	1	179788962	179799724	MSTRG.2773.1
1	169149638	233806417	Backfat weight QTL (12724)	1	179796932	179799853	MSTRG.2773.2
1	169149638	233806417	Backfat weight QTL (12724)	1	213147552	213195062	MSTRG.3379.1
1	169149638	233806417	Backfat weight QTL (12724)	1	229871932	229955811	MSTRG.3631.1
1	169149638	228164160	Loin muscle area QTL (3640)	1	179788962	179799724	MSTRG.2773.1
1	169149638	228164160	Loin muscle area QTL (3640)	1	179796932	179799853	MSTRG.2773.2
1	169149638	228164160	Loin muscle area QTL (3640)	1	213147552	213195062	MSTRG.3379.1
1	169149638	233806417	Carcass weight (cold) QTL (12709)	1	179788962	179799724	MSTRG.2773.1
1	169149638	233806417	Carcass weight (cold) QTL (12709)	1	179796932	179799853	MSTRG.2773.2
1	169149638	233806417	Carcass weight (cold) QTL (12709)	1	213147552	213195062	MSTRG.3379.1
1	169149638	233806417	Carcass weight (cold) QTL (12709)	1	229871932	229955811	MSTRG.3631.1
1	169149638	233806417	External fat on ham QTL (12717)	1	179788962	179799724	MSTRG.2773.1
1	169149638	233806417	External fat on ham QTL (12717)	1	179796932	179799853	MSTRG.2773.2
1	169149638	233806417	External fat on ham QTL (12717)	1	213147552	213195062	MSTRG.3379.1
1	169149638	233806417	External fat on ham QTL (12717)	1	229871932	229955811	MSTRG.3631.1
1	169149638	233806417	Backfat at tenth rib QTL (12733)	1	179788962	179799724	MSTRG.2773.1
1	169149638	233806417	Backfat at tenth rib QTL (12733)	1	179796932	179799853	MSTRG.2773.2
1	169149638	233806417	Backfat at tenth rib QTL (12733)	1	213147552	213195062	MSTRG.3379.1
1	169149638	233806417	Backfat at tenth rib QTL (12733)	1	229871932	229955811	MSTRG.3631.1
1	169149638	226764071	Feed intake QTL (866)	1	179788962	179799724	MSTRG.2773.1
1	169149638	226764071	Feed intake QTL (866)	1	179796932	179799853	MSTRG.2773.2
1	169149638	226764071	Feed intake QTL (866)	1	213147552	213195062	MSTRG.3379.1
1	169149638	257763699	Backfat at last rib QTL (44)	1	179788962	179799724	MSTRG.2773.1
1	169149638	257763699	Backfat at last rib QTL (44)	1	179796932	179799853	MSTRG.2773.2
1	169149638	257763699	Backfat at last rib QTL (44)	1	213147552	213195062	MSTRG.3379.1
1	169149638	257763699	Backfat at last rib QTL (44)	1	247060447	247069977	MSTRG.3931.1
1	169149638	257763699	Backfat at last rib QTL (44)	1	247062253	247065719	MSTRG.3931.2
1	169149638	257763699	Backfat at last rib QTL (44)	1	229871932	229955811	MSTRG.3631.1
1	169149638	228164160	Loin muscle area QTL (2742)	1	179788962	179799724	MSTRG.2773.1
1	169149638	228164160	Loin muscle area QTL (2742)	1	179796932	179799853	MSTRG.2773.2
1	169149638	228164160	Loin muscle area QTL (2742)	1	213147552	213195062	MSTRG.3379.1
1	169149638	292955427	Average daily gain QTL (3914)	1	179788962	179799724	MSTRG.2773.1
1	169149638	292955427	Average daily gain QTL (3914)	1	179796932	179799853	MSTRG.2773.2
1	169149638	292955427	Average daily gain QTL (3914)	1	213147552	213195062	MSTRG.3379.1
1	169149638	292955427	Average daily gain QTL (3914)	1	247060447	247069977	MSTRG.3931.1
1	169149638	292955427	Average daily gain QTL (3914)	1	247062253	247065719	MSTRG.3931.2
1	169149638	292955427	Average daily gain QTL (3914)	1	264223330	264237373	MSTRG.4184.1
1	169149638	292955427	Average daily gain QTL (3914)	1	264223330	264237373	MSTRG.4184.2
1	169149638	292955427	Average daily gain QTL (3914)	1	267187495	267188526	MSTRG.4258.2
1	169149638	292955427	Average daily gain QTL (3914)	1	267187495	267206909	MSTRG.4258.1
1	169149638	292955427	Average daily gain QTL (3914)	1	229871932	229955811	MSTRG.3631.1
1	169149638	265323610	Average backfat thickness QTL (17996)	1	179788962	179799724	MSTRG.2773.1
1	169149638	265323610	Average backfat thickness QTL (17996)	1	179796932	179799853	MSTRG.2773.2
1	169149638	265323610	Average backfat thickness QTL (17996)	1	213147552	213195062	MSTRG.3379.1
1	169149638	265323610	Average backfat thickness QTL (17996)	1	247060447	247069977	MSTRG.3931.1
1	169149638	265323610	Average backfat thickness QTL (17996)	1	247062253	247065719	MSTRG.3931.2
1	169149638	265323610	Average backfat thickness QTL (17996)	1	264223330	264237373	MSTRG.4184.1
1	169149638	265323610	Average backfat thickness QTL (17996)	1	264223330	264237373	MSTRG.4184.2
1	169149638	265323610	Average backfat thickness QTL (17996)	1	229871932	229955811	MSTRG.3631.1
1	169149638	265323610	Carcass weight (hot) QTL (16897)	1	179788962	179799724	MSTRG.2773.1
1	169149638	265323610	Carcass weight (hot) QTL (16897)	1	179796932	179799853	MSTRG.2773.2
1	169149638	265323610	Carcass weight (hot) QTL (16897)	1	213147552	213195062	MSTRG.3379.1
1	169149638	265323610	Carcass weight (hot) QTL (16897)	1	247060447	247069977	MSTRG.3931.1
1	169149638	265323610	Carcass weight (hot) QTL (16897)	1	247062253	247065719	MSTRG.3931.2
1	169149638	265323610	Carcass weight (hot) QTL (16897)	1	264223330	264237373	MSTRG.4184.1
1	169149638	265323610	Carcass weight (hot) QTL (16897)	1	264223330	264237373	MSTRG.4184.2
1	169149638	265323610	Carcass weight (hot) QTL (16897)	1	229871932	229955811	MSTRG.3631.1
1	169149638	292955427	Average daily gain QTL (3917)	1	179788962	179799724	MSTRG.2773.1
1	169149638	292955427	Average daily gain QTL (3917)	1	179796932	179799853	MSTRG.2773.2
1	169149638	292955427	Average daily gain QTL (3917)	1	213147552	213195062	MSTRG.3379.1
1	169149638	292955427	Average daily gain QTL (3917)	1	247060447	247069977	MSTRG.3931.1
1	169149638	292955427	Average daily gain QTL (3917)	1	247062253	247065719	MSTRG.3931.2
1	169149638	292955427	Average daily gain QTL (3917)	1	264223330	264237373	MSTRG.4184.1
1	169149638	292955427	Average daily gain QTL (3917)	1	264223330	264237373	MSTRG.4184.2
1	169149638	292955427	Average daily gain QTL (3917)	1	267187495	267188526	MSTRG.4258.2
1	169149638	292955427	Average daily gain QTL (3917)	1	267187495	267206909	MSTRG.4258.1
1	169149638	292955427	Average daily gain QTL (3917)	1	229871932	229955811	MSTRG.3631.1
1	174394489	230570794	Average backfat thickness QTL (1269)	1	179788962	179799724	MSTRG.2773.1
1	174394489	230570794	Average backfat thickness QTL (1269)	1	179796932	179799853	MSTRG.2773.2
1	174394489	230570794	Average backfat thickness QTL (1269)	1	213147552	213195062	MSTRG.3379.1
1	174394489	230570794	Average backfat thickness QTL (1269)	1	229871932	229955811	MSTRG.3631.1
1	175004689	189008437	Backfat at last lumbar QTL (4015)	1	179788962	179799724	MSTRG.2773.1
1	175004689	189008437	Backfat at last lumbar QTL (4015)	1	179796932	179799853	MSTRG.2773.2
1	175004689	199579088	Average backfat thickness QTL (4016)	1	179788962	179799724	MSTRG.2773.1
1	175004689	199579088	Average backfat thickness QTL (4016)	1	179796932	179799853	MSTRG.2773.2
1	176184627	230570794	Meat color a* QTL (12663)	1	179788962	179799724	MSTRG.2773.1
1	176184627	230570794	Meat color a* QTL (12663)	1	179796932	179799853	MSTRG.2773.2
1	176184627	230570794	Meat color a* QTL (12663)	1	213147552	213195062	MSTRG.3379.1
1	176184627	230570794	Meat color a* QTL (12663)	1	229871932	229955811	MSTRG.3631.1
1	178024855	179959509	Time in feeder per day QTL (135650)	1	179788962	179799724	MSTRG.2773.1
1	178024855	179959509	Time in feeder per day QTL (135650)	1	179796932	179799853	MSTRG.2773.2
1	179002367	179959509	Days to 110 kg QTL (139164)	1	179788962	179799724	MSTRG.2773.1
1	179002367	179959509	Days to 110 kg QTL (139164)	1	179796932	179799853	MSTRG.2773.2
1	179002367	179959509	Daily feed intake QTL (135641)	1	179788962	179799724	MSTRG.2773.1
1	179002367	179959509	Daily feed intake QTL (135641)	1	179796932	179799853	MSTRG.2773.2
1	179002367	179959509	Time in feeder per day QTL (135651)	1	179788962	179799724	MSTRG.2773.1
1	179002367	179959509	Time in feeder per day QTL (135651)	1	179796932	179799853	MSTRG.2773.2
1	199128720	272692549	Age at puberty QTL (520)	1	213147552	213195062	MSTRG.3379.1
1	199128720	272692549	Age at puberty QTL (520)	1	247060447	247069977	MSTRG.3931.1
1	199128720	272692549	Age at puberty QTL (520)	1	247062253	247065719	MSTRG.3931.2
1	199128720	272692549	Age at puberty QTL (520)	1	264223330	264237373	MSTRG.4184.1
1	199128720	272692549	Age at puberty QTL (520)	1	264223330	264237373	MSTRG.4184.2
1	199128720	272692549	Age at puberty QTL (520)	1	267187495	267188526	MSTRG.4258.2
1	199128720	272692549	Age at puberty QTL (520)	1	267187495	267206909	MSTRG.4258.1
1	199128720	272692549	Age at puberty QTL (520)	1	229871932	229955811	MSTRG.3631.1
1	204653903	279476353	Backfat weight QTL (798)	1	213147552	213195062	MSTRG.3379.1
1	204653903	279476353	Backfat weight QTL (798)	1	247060447	247069977	MSTRG.3931.1
1	204653903	279476353	Backfat weight QTL (798)	1	247062253	247065719	MSTRG.3931.2
1	204653903	279476353	Backfat weight QTL (798)	1	264223330	264237373	MSTRG.4184.1
1	204653903	279476353	Backfat weight QTL (798)	1	264223330	264237373	MSTRG.4184.2
1	204653903	279476353	Backfat weight QTL (798)	1	267187495	267188526	MSTRG.4258.2
1	204653903	279476353	Backfat weight QTL (798)	1	267187495	267206909	MSTRG.4258.1
1	204653903	279476353	Backfat weight QTL (798)	1	229871932	229955811	MSTRG.3631.1
1	204876452	257944209	Locomotion QTL (478)	1	213147552	213195062	MSTRG.3379.1
1	204876452	257944209	Locomotion QTL (478)	1	247060447	247069977	MSTRG.3931.1
1	204876452	257944209	Locomotion QTL (478)	1	247062253	247065719	MSTRG.3931.2
1	204876452	257944209	Locomotion QTL (478)	1	229871932	229955811	MSTRG.3631.1
1	210644363	228164160	Linolenic acid content QTL (686)	1	213147552	213195062	MSTRG.3379.1
1	210644363	292955427	Average daily gain QTL (5681)	1	213147552	213195062	MSTRG.3379.1
1	210644363	292955427	Average daily gain QTL (5681)	1	247060447	247069977	MSTRG.3931.1
1	210644363	292955427	Average daily gain QTL (5681)	1	247062253	247065719	MSTRG.3931.2
1	210644363	292955427	Average daily gain QTL (5681)	1	264223330	264237373	MSTRG.4184.1
1	210644363	292955427	Average daily gain QTL (5681)	1	264223330	264237373	MSTRG.4184.2
1	210644363	292955427	Average daily gain QTL (5681)	1	267187495	267188526	MSTRG.4258.2
1	210644363	292955427	Average daily gain QTL (5681)	1	267187495	267206909	MSTRG.4258.1
1	210644363	292955427	Average daily gain QTL (5681)	1	229871932	229955811	MSTRG.3631.1
1	210644363	252283830	backfat above muscle dorsi QTL (5673)	1	213147552	213195062	MSTRG.3379.1
1	210644363	252283830	backfat above muscle dorsi QTL (5673)	1	247060447	247069977	MSTRG.3931.1
1	210644363	252283830	backfat above muscle dorsi QTL (5673)	1	247062253	247065719	MSTRG.3931.2
1	210644363	252283830	backfat above muscle dorsi QTL (5673)	1	229871932	229955811	MSTRG.3631.1
1	213150682	213670394	Drip loss QTL (7863)	1	213147552	213195062	MSTRG.3379.1
1	213150682	213670394	Drip loss QTL (7864)	1	213147552	213195062	MSTRG.3379.1
1	216112266	294659146	Adipocyte diameter QTL (18019)	1	247060447	247069977	MSTRG.3931.1
1	216112266	294659146	Adipocyte diameter QTL (18019)	1	247062253	247065719	MSTRG.3931.2
1	216112266	294659146	Adipocyte diameter QTL (18019)	1	264223330	264237373	MSTRG.4184.1
1	216112266	294659146	Adipocyte diameter QTL (18019)	1	264223330	264237373	MSTRG.4184.2
1	216112266	294659146	Adipocyte diameter QTL (18019)	1	267187495	267188526	MSTRG.4258.2
1	216112266	294659146	Adipocyte diameter QTL (18019)	1	267187495	267206909	MSTRG.4258.1
1	216112266	294659146	Adipocyte diameter QTL (18019)	1	229871932	229955811	MSTRG.3631.1
1	216112266	294659146	Backfat at last rib QTL (16833)	1	247060447	247069977	MSTRG.3931.1
1	216112266	294659146	Backfat at last rib QTL (16833)	1	247062253	247065719	MSTRG.3931.2
1	216112266	294659146	Backfat at last rib QTL (16833)	1	264223330	264237373	MSTRG.4184.1
1	216112266	294659146	Backfat at last rib QTL (16833)	1	264223330	264237373	MSTRG.4184.2
1	216112266	294659146	Backfat at last rib QTL (16833)	1	267187495	267188526	MSTRG.4258.2
1	216112266	294659146	Backfat at last rib QTL (16833)	1	267187495	267206909	MSTRG.4258.1
1	216112266	294659146	Backfat at last rib QTL (16833)	1	229871932	229955811	MSTRG.3631.1
1	216980027	242984908	Hind leg conformation QTL (126118)	1	229871932	229955811	MSTRG.3631.1
1	218980897	265323610	Subcutanous fat area QTL (18002)	1	247060447	247069977	MSTRG.3931.1
1	218980897	265323610	Subcutanous fat area QTL (18002)	1	247062253	247065719	MSTRG.3931.2
1	218980897	265323610	Subcutanous fat area QTL (18002)	1	264223330	264237373	MSTRG.4184.1
1	218980897	265323610	Subcutanous fat area QTL (18002)	1	264223330	264237373	MSTRG.4184.2
1	218980897	265323610	Subcutanous fat area QTL (18002)	1	229871932	229955811	MSTRG.3631.1
1	220801047	247820666	Average backfat thickness QTL (2844)	1	247060447	247069977	MSTRG.3931.1
1	220801047	247820666	Average backfat thickness QTL (2844)	1	247062253	247065719	MSTRG.3931.2
1	220801047	247820666	Average backfat thickness QTL (2844)	1	229871932	229955811	MSTRG.3631.1
1	220801047	266165650	Ham fat percentage QTL (1272)	1	247060447	247069977	MSTRG.3931.1
1	220801047	266165650	Ham fat percentage QTL (1272)	1	247062253	247065719	MSTRG.3931.2
1	220801047	266165650	Ham fat percentage QTL (1272)	1	264223330	264237373	MSTRG.4184.1
1	220801047	266165650	Ham fat percentage QTL (1272)	1	264223330	264237373	MSTRG.4184.2
1	220801047	266165650	Ham fat percentage QTL (1272)	1	229871932	229955811	MSTRG.3631.1
1	220801047	266165650	Lean meat percentage QTL (1264)	1	247060447	247069977	MSTRG.3931.1
1	220801047	266165650	Lean meat percentage QTL (1264)	1	247062253	247065719	MSTRG.3931.2
1	220801047	266165650	Lean meat percentage QTL (1264)	1	264223330	264237373	MSTRG.4184.1
1	220801047	266165650	Lean meat percentage QTL (1264)	1	264223330	264237373	MSTRG.4184.2
1	220801047	266165650	Lean meat percentage QTL (1264)	1	229871932	229955811	MSTRG.3631.1
1	220801047	266165650	Lean meat + bone in back QTL (1266)	1	247060447	247069977	MSTRG.3931.1
1	220801047	266165650	Lean meat + bone in back QTL (1266)	1	247062253	247065719	MSTRG.3931.2
1	220801047	266165650	Lean meat + bone in back QTL (1266)	1	264223330	264237373	MSTRG.4184.1
1	220801047	266165650	Lean meat + bone in back QTL (1266)	1	264223330	264237373	MSTRG.4184.2
1	220801047	266165650	Lean meat + bone in back QTL (1266)	1	229871932	229955811	MSTRG.3631.1
1	220801047	266165650	Backfat weight QTL (1267)	1	247060447	247069977	MSTRG.3931.1
1	220801047	266165650	Backfat weight QTL (1267)	1	247062253	247065719	MSTRG.3931.2
1	220801047	266165650	Backfat weight QTL (1267)	1	264223330	264237373	MSTRG.4184.1
1	220801047	266165650	Backfat weight QTL (1267)	1	264223330	264237373	MSTRG.4184.2
1	220801047	266165650	Backfat weight QTL (1267)	1	229871932	229955811	MSTRG.3631.1
1	220801047	266165650	Backfat percentage QTL (1268)	1	247060447	247069977	MSTRG.3931.1
1	220801047	266165650	Backfat percentage QTL (1268)	1	247062253	247065719	MSTRG.3931.2
1	220801047	266165650	Backfat percentage QTL (1268)	1	264223330	264237373	MSTRG.4184.1
1	220801047	266165650	Backfat percentage QTL (1268)	1	264223330	264237373	MSTRG.4184.2
1	220801047	266165650	Backfat percentage QTL (1268)	1	229871932	229955811	MSTRG.3631.1
1	220801047	266165650	Ham percentage QTL (1270)	1	247060447	247069977	MSTRG.3931.1
1	220801047	266165650	Ham percentage QTL (1270)	1	247062253	247065719	MSTRG.3931.2
1	220801047	266165650	Ham percentage QTL (1270)	1	264223330	264237373	MSTRG.4184.1
1	220801047	266165650	Ham percentage QTL (1270)	1	264223330	264237373	MSTRG.4184.2
1	220801047	266165650	Ham percentage QTL (1270)	1	229871932	229955811	MSTRG.3631.1
1	220801047	247820666	Protein accretion rate QTL (2848)	1	247060447	247069977	MSTRG.3931.1
1	220801047	247820666	Protein accretion rate QTL (2848)	1	247062253	247065719	MSTRG.3931.2
1	220801047	247820666	Protein accretion rate QTL (2848)	1	229871932	229955811	MSTRG.3631.1
1	220801047	271800234	Jowl weight QTL (2842)	1	247060447	247069977	MSTRG.3931.1
1	220801047	271800234	Jowl weight QTL (2842)	1	247062253	247065719	MSTRG.3931.2
1	220801047	271800234	Jowl weight QTL (2842)	1	264223330	264237373	MSTRG.4184.1
1	220801047	271800234	Jowl weight QTL (2842)	1	264223330	264237373	MSTRG.4184.2
1	220801047	271800234	Jowl weight QTL (2842)	1	267187495	267188526	MSTRG.4258.2
1	220801047	271800234	Jowl weight QTL (2842)	1	267187495	267206909	MSTRG.4258.1
1	220801047	271800234	Jowl weight QTL (2842)	1	229871932	229955811	MSTRG.3631.1
1	220801047	271800234	Average daily gain QTL (2846)	1	247060447	247069977	MSTRG.3931.1
1	220801047	271800234	Average daily gain QTL (2846)	1	247062253	247065719	MSTRG.3931.2
1	220801047	271800234	Average daily gain QTL (2846)	1	264223330	264237373	MSTRG.4184.1
1	220801047	271800234	Average daily gain QTL (2846)	1	264223330	264237373	MSTRG.4184.2
1	220801047	271800234	Average daily gain QTL (2846)	1	267187495	267188526	MSTRG.4258.2
[truncated: 19,542 more rows]
