# Supplementary material for: Transcriptome Analysis Reveals the Effect of Long Intergenic Noncoding RNAs on Pig Muscle Growth and Fat Deposition
Source: Biomed Res Int. 2019 Jun 25;2019:2951427. doi: 10.1155/2019/2951427 (PMC6614983; doi:10.1155/2019/2951427)
Supplement: Supplementary Materials — File S1: All lincRNAs comment files. Table S1: The specific expression of the DEGs between two tissues (af vs. ldm). Table S2: The specific expression of the DEGs between two tissues (af vs. liver). Table S3: The specific expression of the DEGs between two tissues (ldm vs. liver). Table S4: The basic information of the 272 DEGs. Table S5: Results of functional enrichment in gene ontology and pathway analysis. Table S6: Results of relevant QTLs screened by DELs. Table S7: PCR primers of 4 pairs of lincRNAs and PTGs. [file 2951427.f1.zip › TableS7.xlsx]

## Sheet: 工作表1
ID	Primer name	Primer sequence（5'to3'）
1	MSTRG.32975-dl-F	GTTCCCCCCGCTGTCTTTT
2	MSTRG.32975-dl-R	CCCTGTGATCCCATTTCCA
3	MSTRG.7054-dl-F	GGAGCCCTGGATGGACA
4	MSTRG.7054-dl-R	CAAGCAGCGGTTGAGATG
5	GCGR-dl-F	ACCAGTGTCTCCGCAACC
6	GCGR-dl-R	GACGCAAGCAGGTTCGC
7	DPYD-dl-F	CAGTGGTGCTTCGGTCCTC
8	DPYD-dl-R	GGTTTCCCCTTCTGGTGAC
9	MSTRG.29576-dl-F	AGGTGTCTGGTTGCGTTTA
10	MSTRG.29576-dl-R	ACTGCGTTGCTGGTTTACT
11	MSTRG.306-dl-F	ACATTTTCATCAACCCCAA
12	MSTRG.306-dl-R	TAGCCACCAAGGACCACAC
13	FUT4-dl-F	TTGGACGACGAGGAAGAAC
14	FUT4-dl-R	GGGTAGAGGTAGCCATAAG
15	FEM1A-dl-F	GTTGAAGCCTTGGAATTGC
16	FEM1A-dl-R	TCTCATCCGGGTCGGTGAT
